# Supplementary material for: Analysis of change in patient-reported outcome measures with floor and ceiling effects using the multilevel Tobit model: a simulation study and an example from a National Joint Register using body mass index and the Oxford Hip Score
Source: PubMed Central journal article supplement (PMC7454239; doi:10.1136/bmjopen-2019-033646), 2020-08-27

## Supplementary Figures

Supplementary Figure 1: Inclusion / Exclusion Criteria of the NJR study.

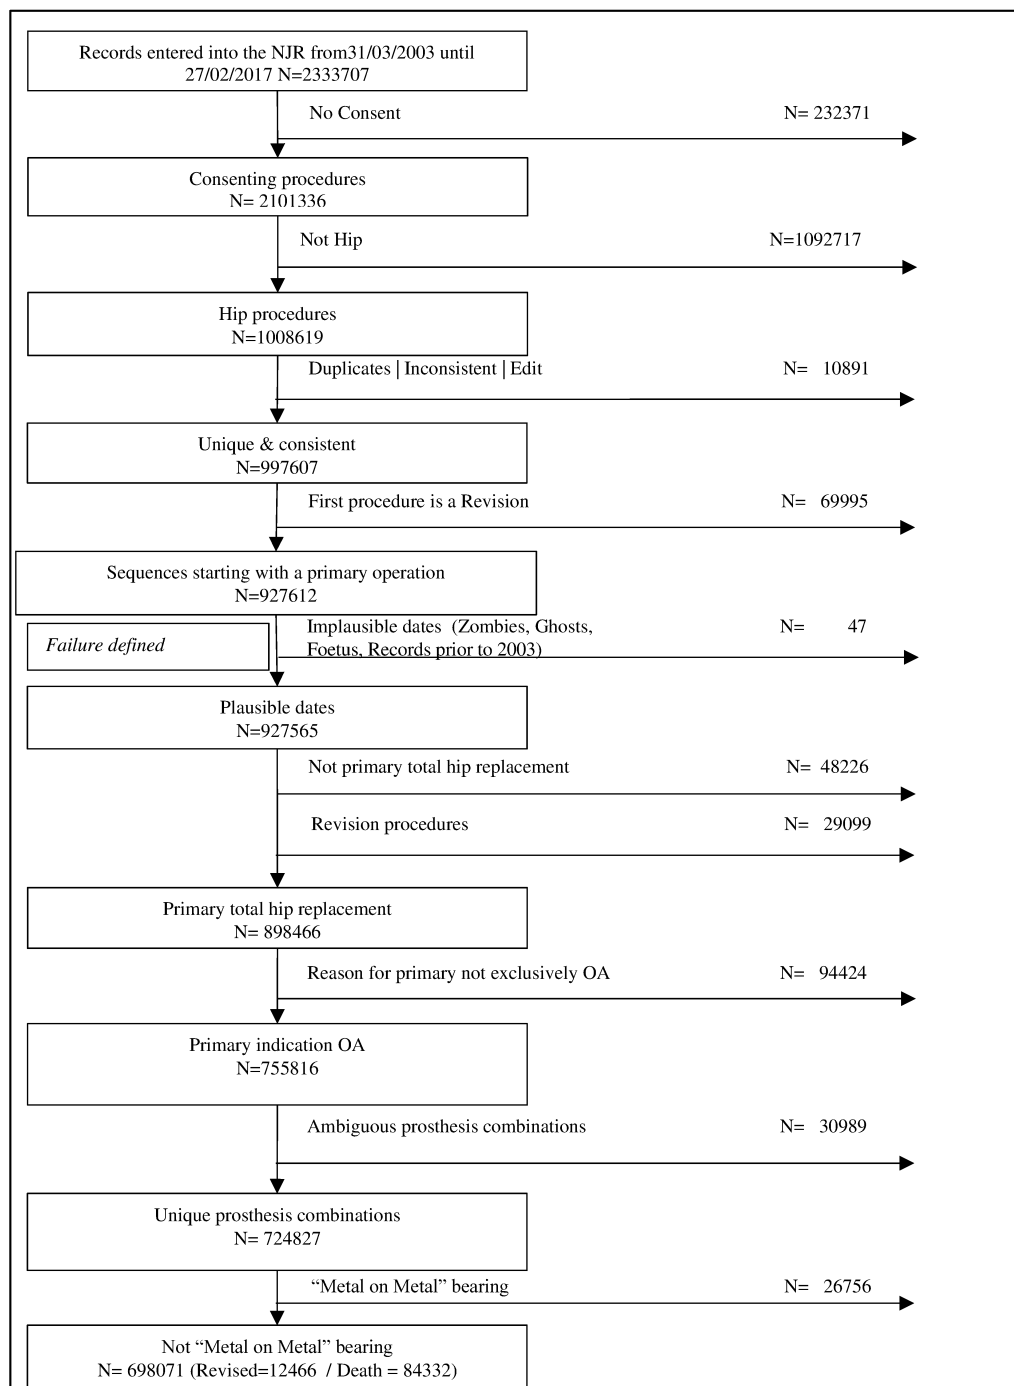

Supplementary.Figure 2: Description of covariate missing data in eligible data

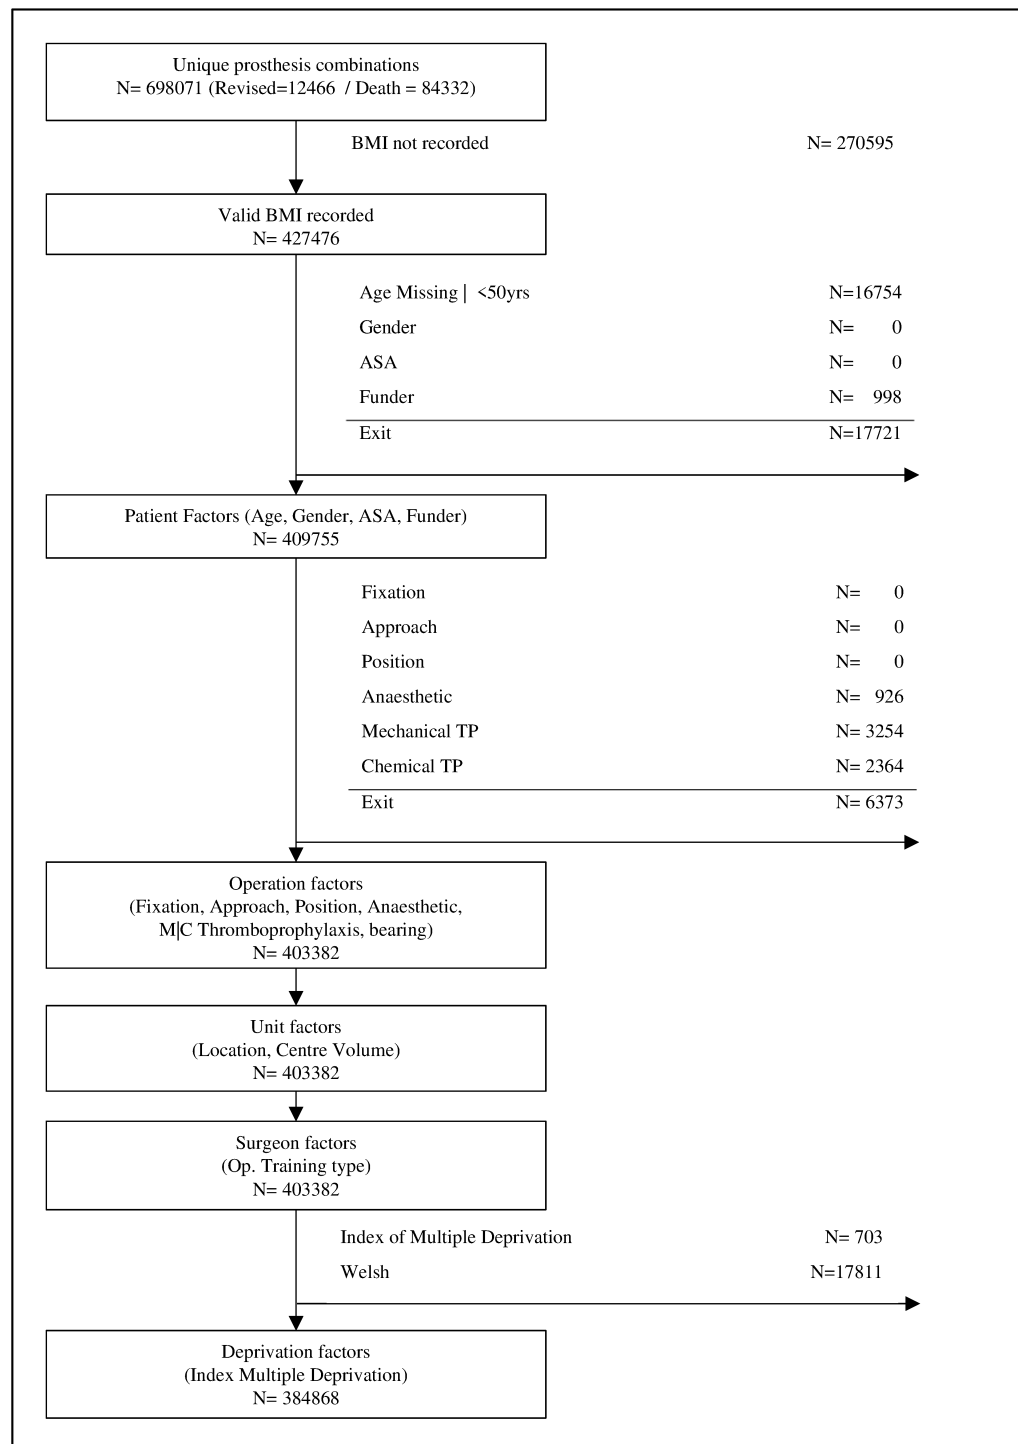

Supplementary.Figure 3: Description of National PROMS linkage to the NJR

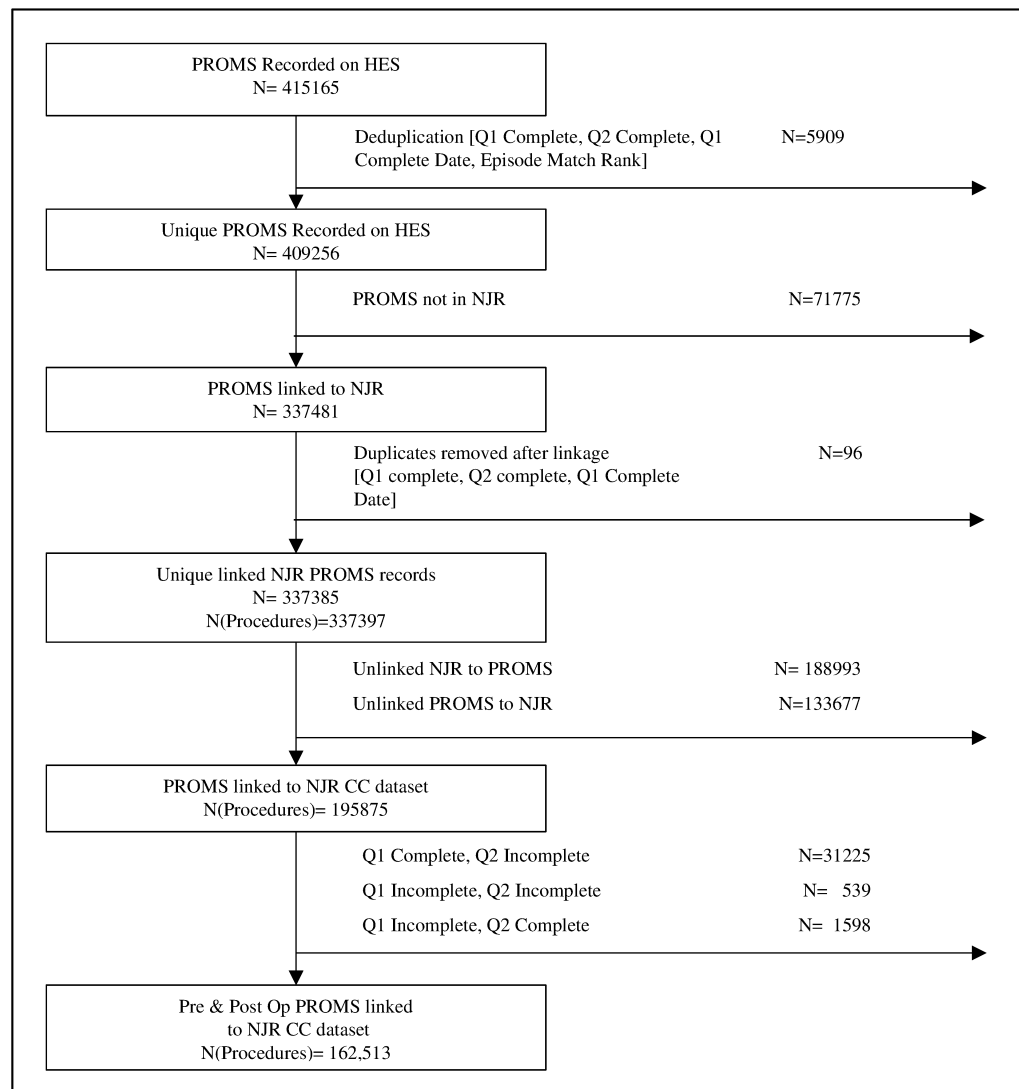

Supplementary Figure 4: “Zip Plot” of the 1000 95% Confidence intervals for each method of analysis for DGP 1. The vertical axis is the centile of the two-sided  $p$ -value against  $H_0 : \beta_3=0$  associated with the confidence interval for MLM and ML Tobit models.

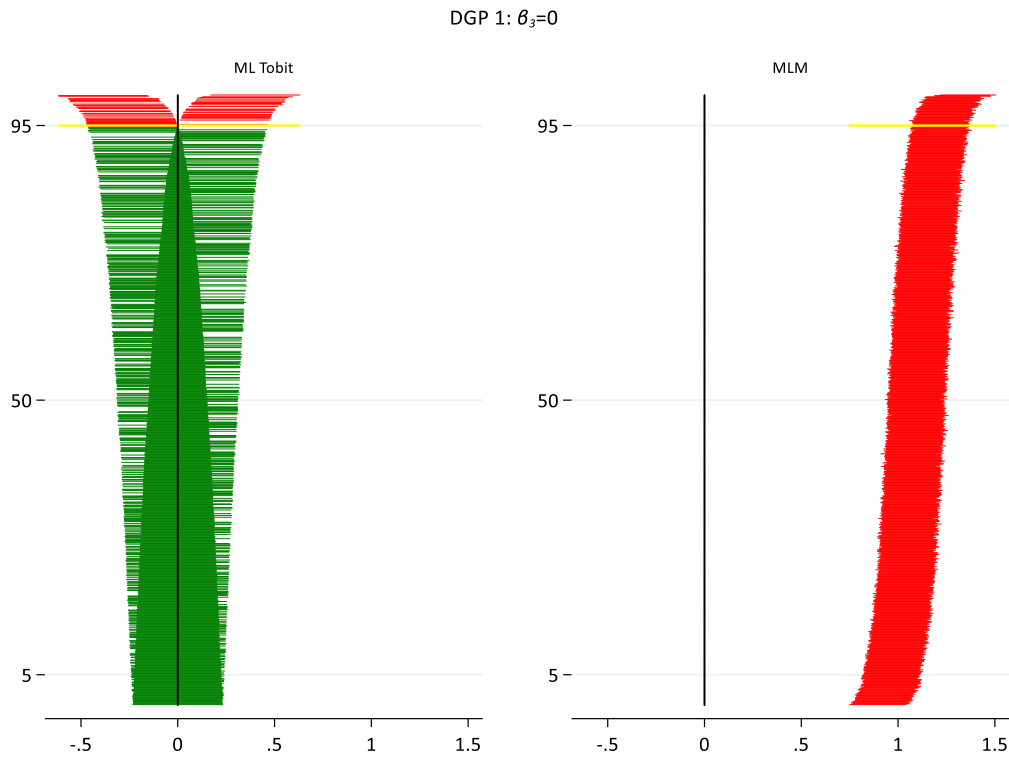

Supplementary.Figure 5: “Zip Plot” of the 1000 95% Confidence intervals for each method of analysis for DGP 1. The vertical axis is the centile of the two-sided p-value against  $H_0 : \beta_3=0$  associated with the confidence interval for ML Tobit models with varying constraints of  $\sigma_\varepsilon^2$

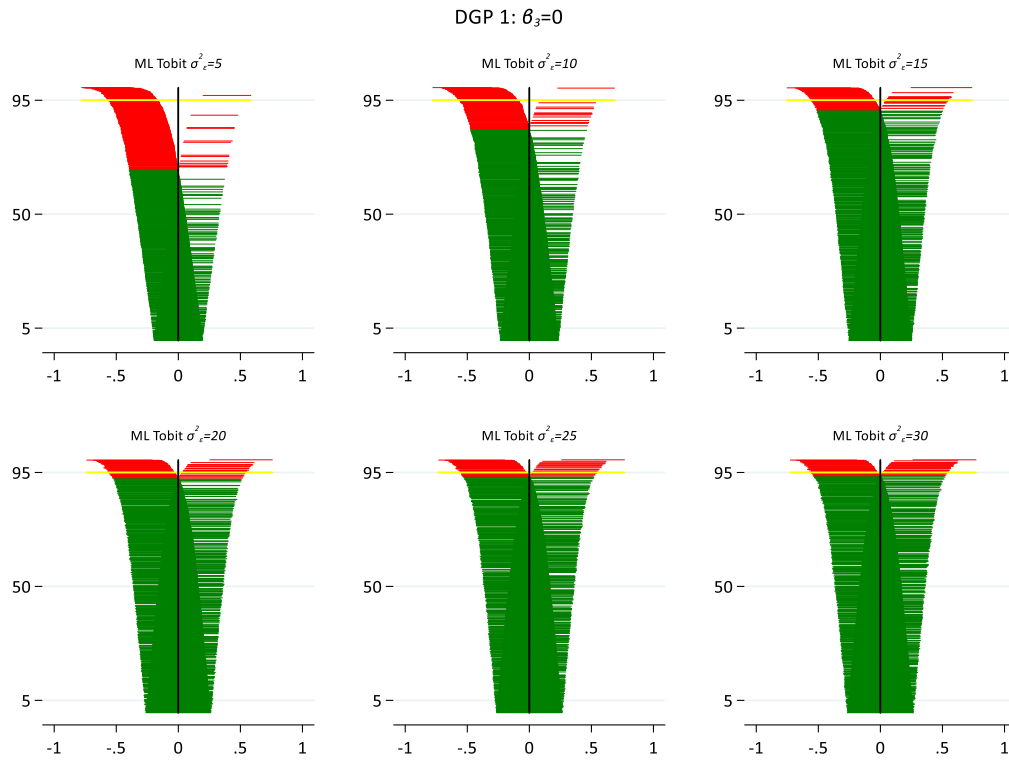

Supplementary.Figure 6: “Zip Plot” of the 1000 95% Confidence intervals for each method of analysis for DGP 1. The vertical axis is the centile of the two-sided p-value against  $H_0 : \beta_3=0$  associated with the confidence interval for Single level OLS and Tobit models.

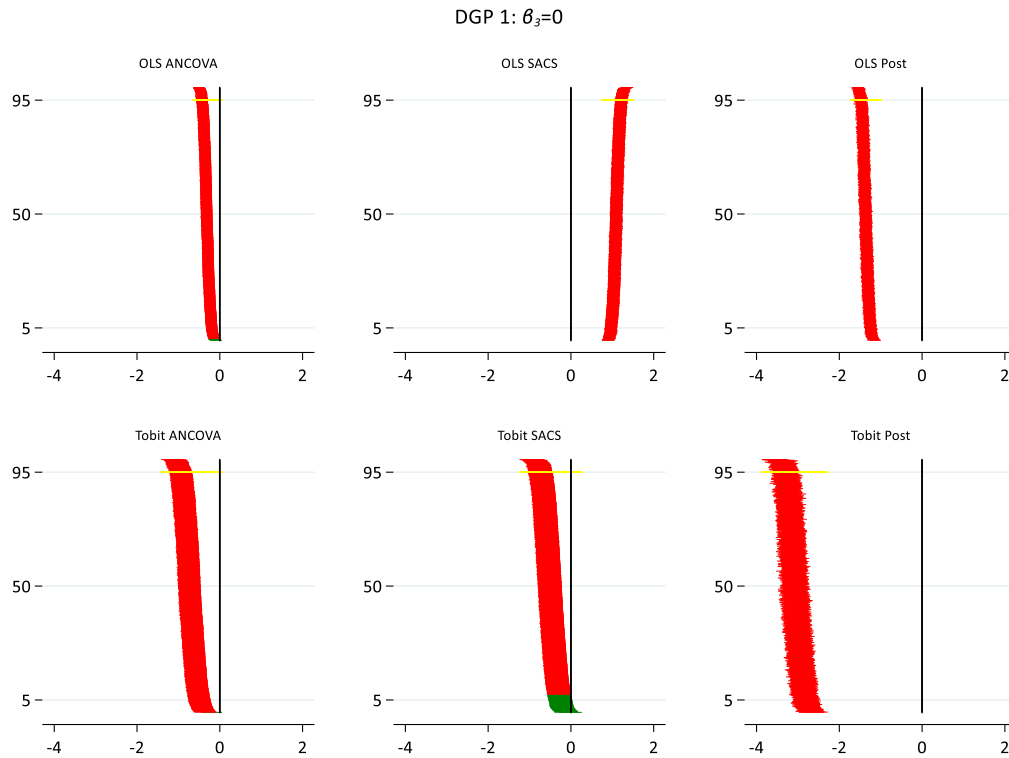

Supplementary.Figure 7: “Zip Plot” of the 1000 95% Confidence intervals for each method of analysis for DGP 2. The vertical axis is the centile of the two-sided p-value against  $H_0 : \beta_3=3$  associated with the confidence interval for MLM and ML Tobit models.

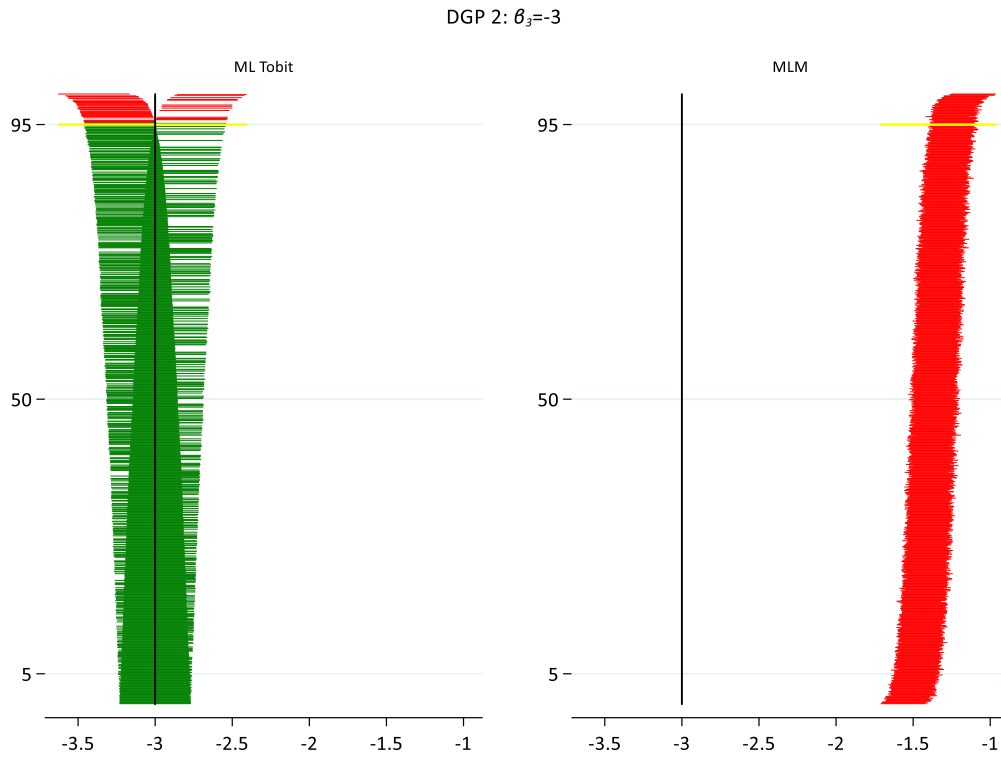

Supplementary Figure 8: “Zip Plot” of the 1000 95% Confidence intervals for each method of analysis for DGP 2. The vertical axis is the centile of the two-sided p-value against  $H_0 : \beta_3=3$  associated with the confidence interval for ML Tobit models with varying constraints of  $\sigma_\varepsilon^2$

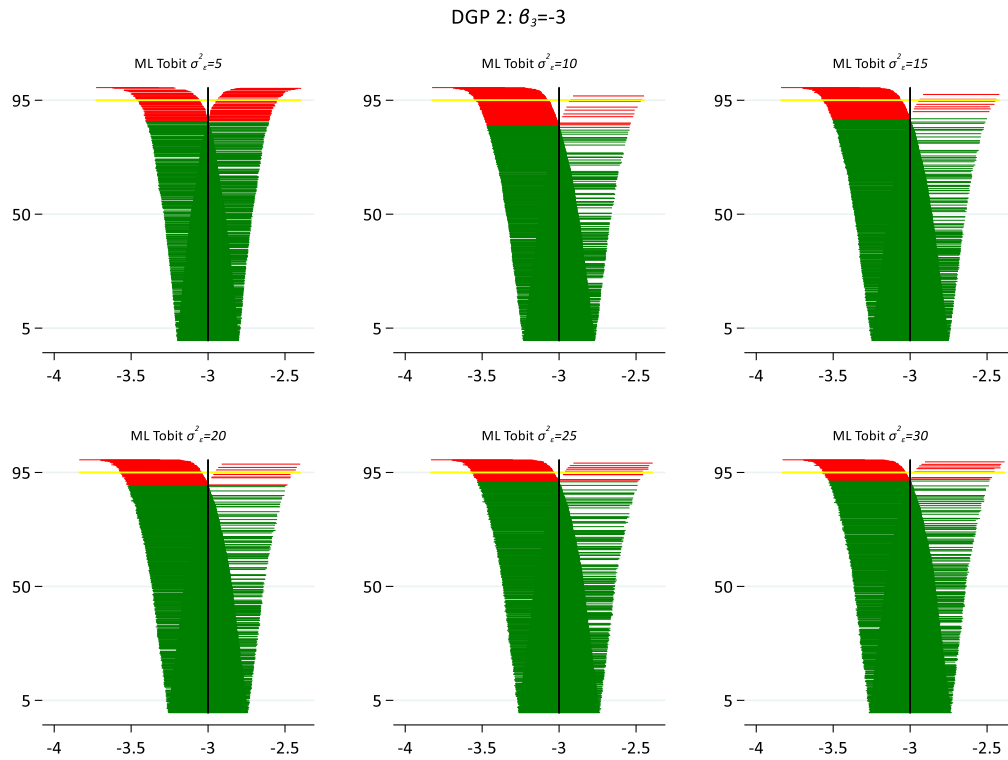



Supplementary.Figure 9: “Zip Plot” of the 1000 95% Confidence intervals for each method of analysis for DGP 2. The vertical axis is the centile of the two-sided p-value against  $H_0 : \beta_3=3$  associated with the confidence interval for Single level OLS and Tobit models.

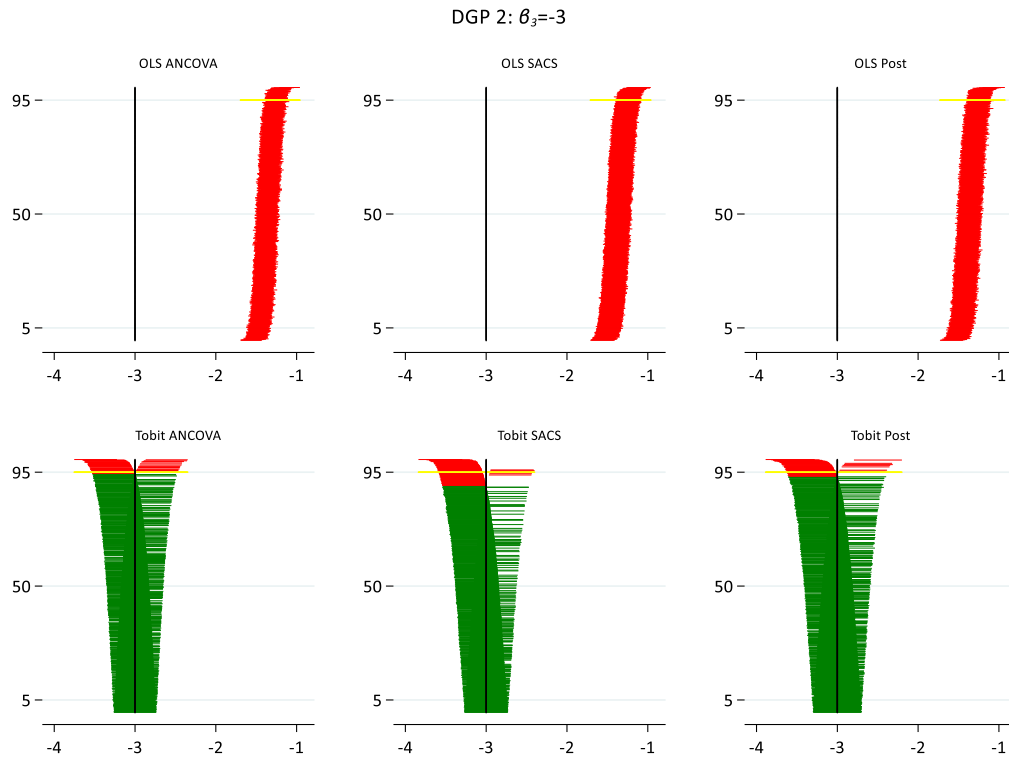

Supplementary Figure 10: “Zip Plot” of the 1000 95% Confidence intervals for each method of analysis for DGP 3. The vertical axis is the centile of the two-sided p-value against  $H_0 : \beta_3=3$  associated with the confidence interval for MLM and ML Tobit models.

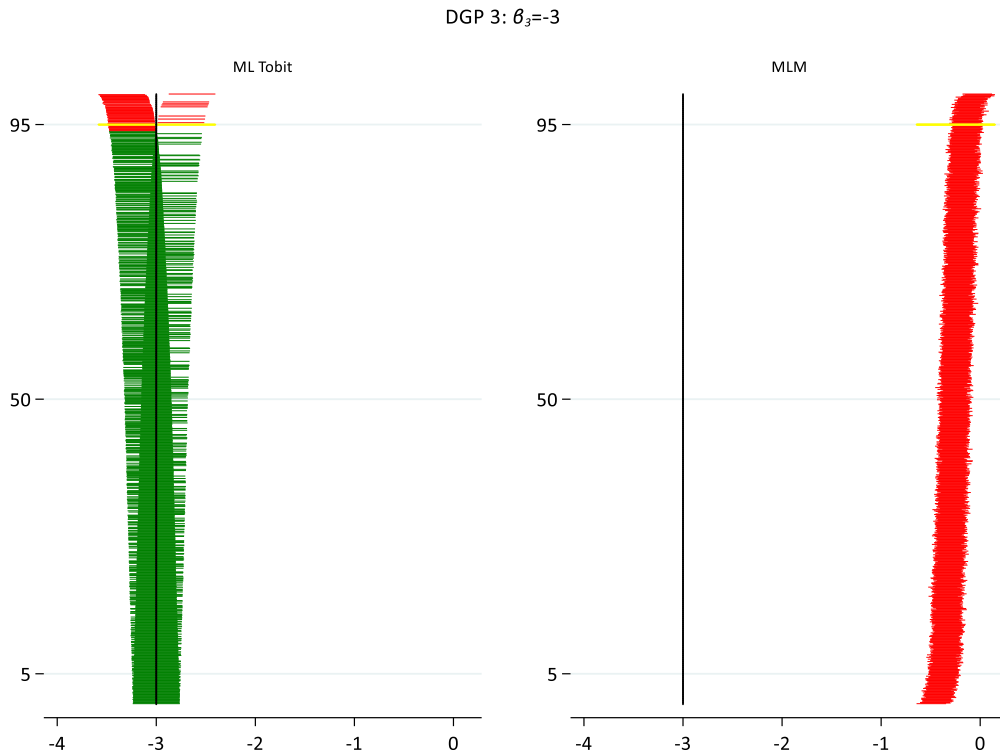

Supplementary.Figure 11: “Zip Plot” of the 1000 95% Confidence intervals for each method of analysis for DGP 3. The vertical axis is the centile of the two-sided p-value against  $H_0 : \beta_3=3$  associated with the confidence interval for ML Tobit models with varying constraints of  $\sigma_\varepsilon^2$

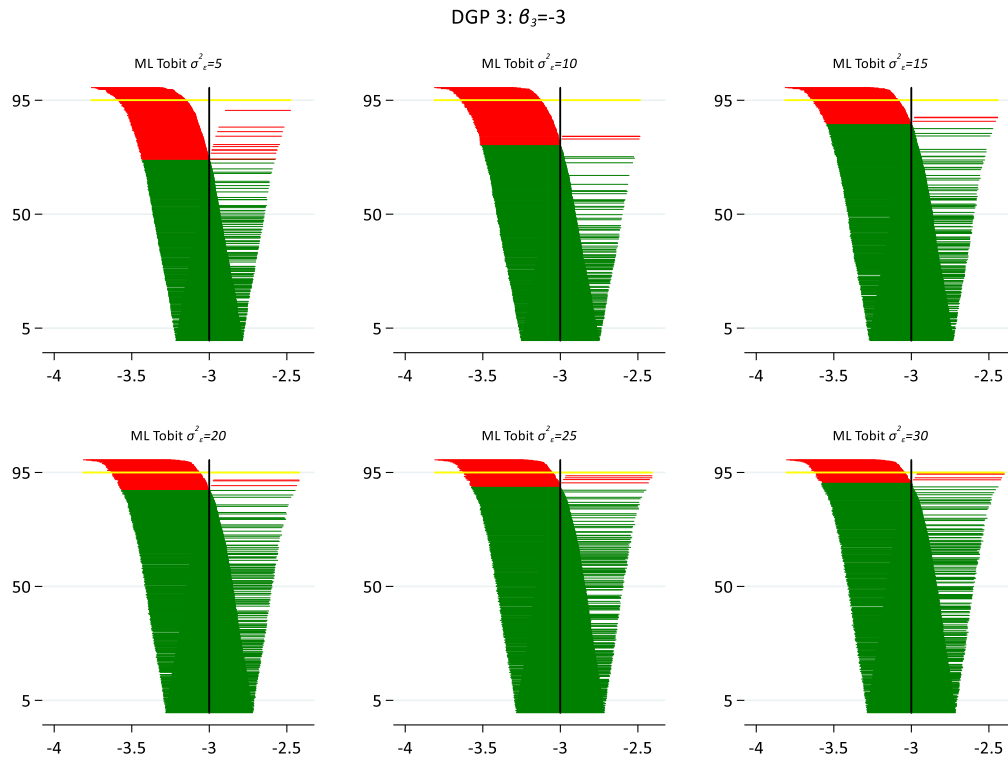

Supplementary Figure 12: “Zip Plot” of the 1000 95% Confidence intervals for each method of analysis for DGP 3. The vertical axis is the centile of the two-sided  $p$ -value against  $H_0 : \beta_3=3$  associated with the confidence interval for Single level OLS and Tobit models.

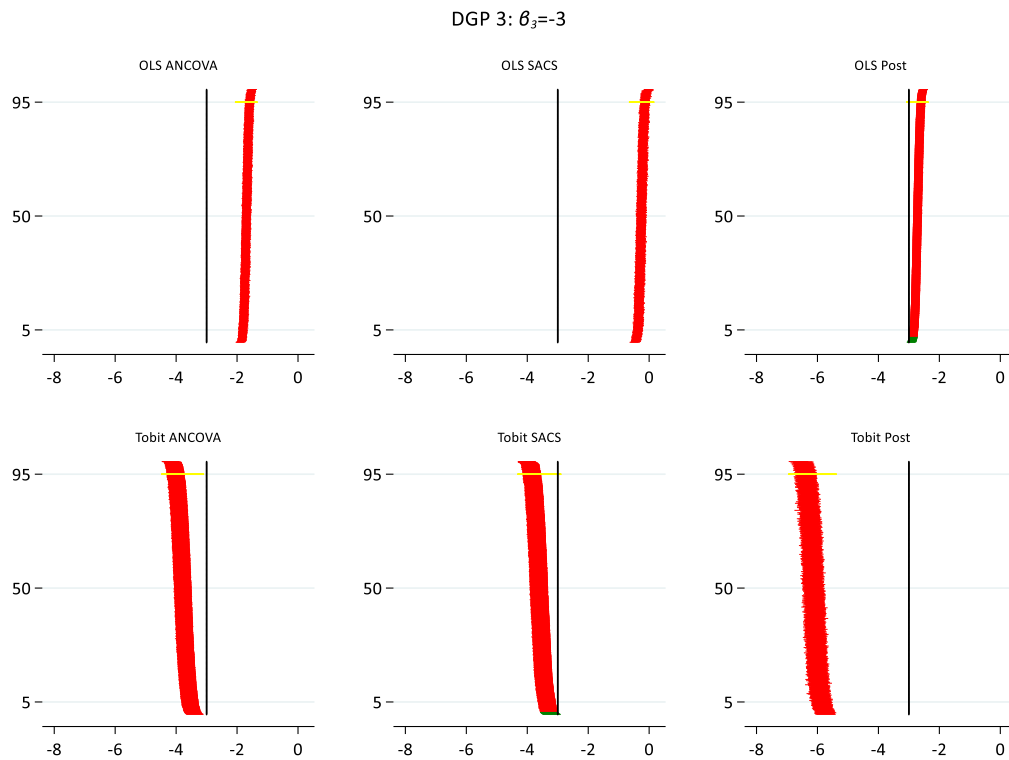

Supplementary.Figure 13: “Zip Plot” of the 1000 95% Confidence intervals for each method of analysis for DGP 4. The vertical axis is the centile of the two-sided  $p$ -value against  $H_0 : \beta_3=0$  associated with the confidence interval for MLM and ML Tobit models.

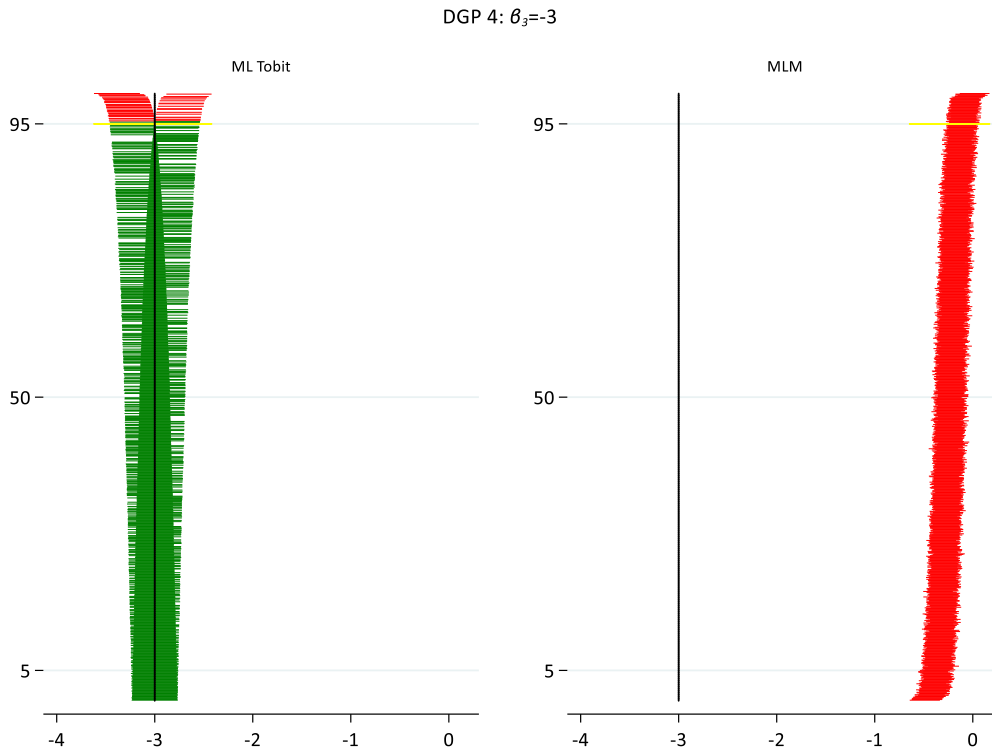

Supplementary.Figure 14: “Zip Plot” of the 1000 95% Confidence intervals for each method of analysis for DGP 4. The vertical axis is the centile of the two-sided p-value against  $H_0 : \beta_3=0$  associated with the confidence interval for ML Tobit models with varying constraints of  $\sigma_\varepsilon^2$

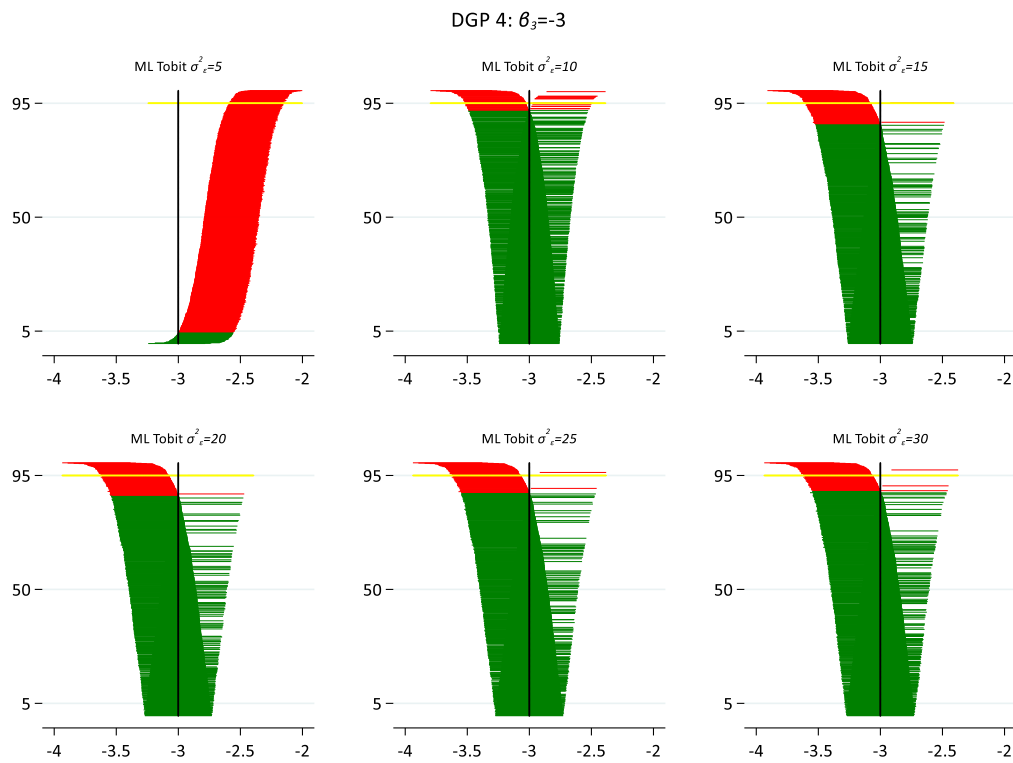

Supplementary Figure 15: “Zip Plot” of the 1000 95% Confidence intervals for each method of analysis for DGP 4. The vertical axis is the centile of the two-sided p-value against  $H_0 : \beta_3=0$  associated with the confidence interval for Single-level OLS and Tobit models.

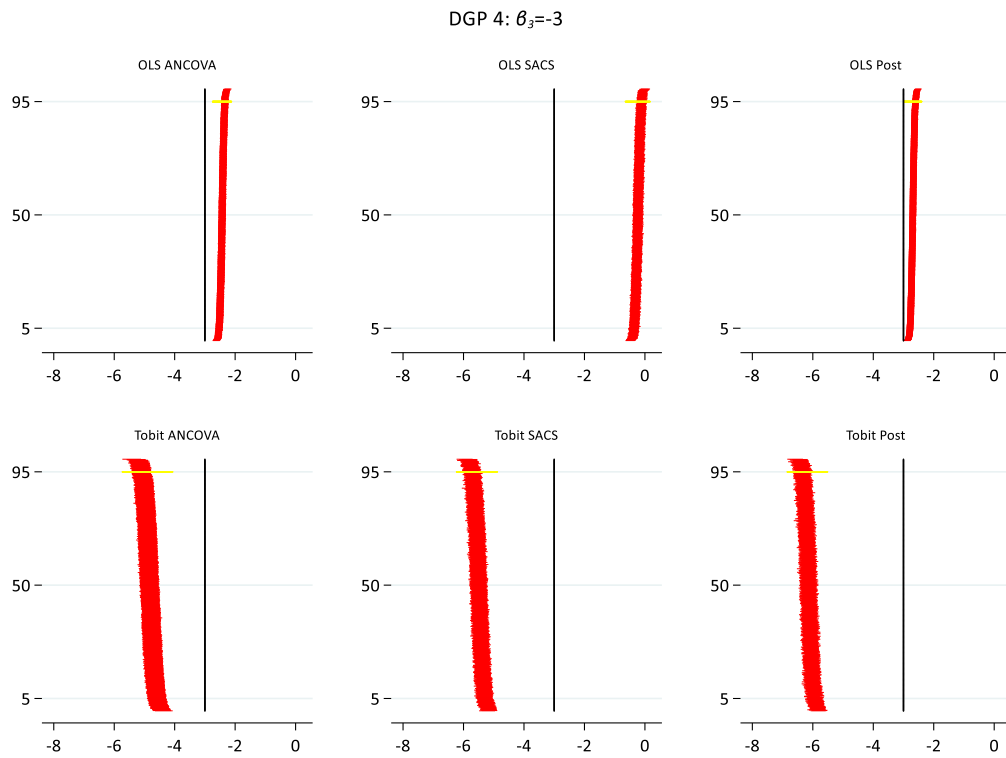

Supplementary Figure 16: Marginal effect of level 1 error variance ( $\sigma_{\varepsilon}^2$ ) constraint on level 2 variance components

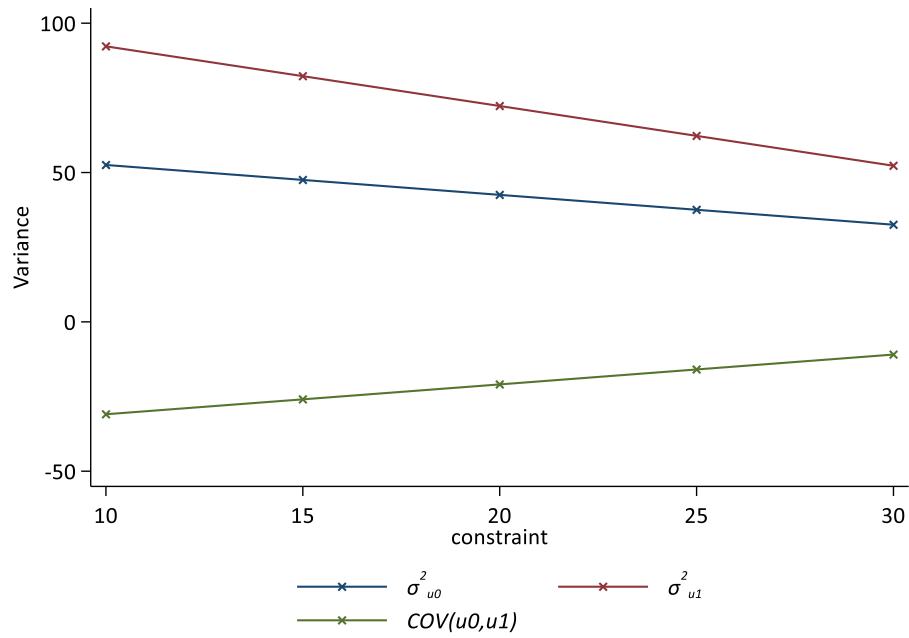

Supplement: bmjopen-2019-033646supp002.pdf [file bmjopen-2019-033646supp002.pdf]
