# Supplementary material for: Analysis of change in patient-reported outcome measures with floor and ceiling effects using the multilevel Tobit model: a simulation study and an example from a National Joint Register using body mass index and the Oxford Hip Score
Source: PubMed Central journal article supplement (PMC7454239; doi:10.1136/bmjopen-2019-033646), 2020-08-27
Supplement: bmjopen-2019-033646.draft_revisions.pdf [file bmjopen-2019-033646.draft_revisions.pdf]

# BMJ Open

BMJ Open is committed to open peer review. As part of this commitment we make the peer review history of every article we publish publicly available.

When an article is published we post the peer reviewers' comments and the authors' responses online. We also post the versions of the paper that were used during peer review. These are the versions that the peer review comments apply to.

The versions of the paper that follow are the versions that were submitted during the peer review process. They are not the versions of record or the final published versions. They should not be cited or distributed as the published version of this manuscript.

BMJ Open is an open access journal and the full, final, typeset and author-corrected version of record of the manuscript is available on our site with no access controls, subscription charges or pay-per-view fees (<http://bmjopen.bmj.com>).

If you have any questions on BMJ Open's open peer review process please email [info.bmjopen@bmj.com](mailto:info.bmjopen@bmj.com)

# BMJ Open

**Analysis of change in patient reported outcome measures with floor and ceiling effects using the multi-level Tobit model: A simulation study and an example from a National Joint Register using body mass index and the Oxford Hip Score.**

|                               |                                                                                                                                                                                                                                                                                                                                                                                                                                                                                                                                          |
|-------------------------------|------------------------------------------------------------------------------------------------------------------------------------------------------------------------------------------------------------------------------------------------------------------------------------------------------------------------------------------------------------------------------------------------------------------------------------------------------------------------------------------------------------------------------------------|
| Journal:                      | <i>BMJ Open</i>                                                                                                                                                                                                                                                                                                                                                                                                                                                                                                                          |
| Manuscript ID                 | bmjopen-2019-033646                                                                                                                                                                                                                                                                                                                                                                                                                                                                                                                      |
| Article Type:                 | Original research                                                                                                                                                                                                                                                                                                                                                                                                                                                                                                                        |
| Date Submitted by the Author: | 19-Aug-2019                                                                                                                                                                                                                                                                                                                                                                                                                                                                                                                              |
| Complete List of Authors:     | Sayers, Adrian; University of Bristol, Musculoskeletal Research Unit Whitehouse, Michael; University of Bristol, Musculoskeletal Research Unit Judge, Andrew; University of Bristol, Musculoskeletal Research Unit, Translational Health Sciences, Bristol Medical School, University of Bristol, Learning and Research Building, Level 1, Southmead Hospital, Southmead, BS10 5NB<br>MacGregor, Alex; University of East Anglia, Norwich Medical School<br>Blom, AW; University of Bristol,<br>Ben-Shlomo, Yoav; University of Bristol, |
| Keywords:                     | Multi-level Tobit Model, Change Scores, Epidemiologic Methods, Arthroplasty, Patient Reported Outcome Measures, Longitudinal Studies                                                                                                                                                                                                                                                                                                                                                                                                     |
|                               |                                                                                                                                                                                                                                                                                                                                                                                                                                                                                                                                          |

SCHOLARONE™  
Manuscripts

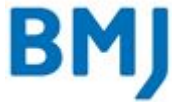

I, the Submitting Author has the right to grant and does grant on behalf of all authors of the Work (as defined in the below author licence), an exclusive licence and/or a non-exclusive licence for contributions from authors who are: i) UK Crown employees; ii) where BMJ has agreed a CC-BY licence shall apply, and/or iii) in accordance with the terms applicable for US Federal Government officers or employees acting as part of their official duties; on a worldwide, perpetual, irrevocable, royalty-free basis to BMJ Publishing Group Ltd ("BMJ") its licensees and where the relevant Journal is co-owned by BMJ to the co-owners of the Journal, to publish the Work in this journal and any other BMJ products and to exploit all rights, as set out in our [licence](#).

The Submitting Author accepts and understands that any supply made under these terms is made by BMJ to the Submitting Author unless you are acting as an employee on behalf of your employer or a postgraduate student of an affiliated institution which is paying any applicable article publishing charge ("APC") for Open Access articles. Where the Submitting Author wishes to make the Work available on an Open Access basis (and intends to pay the relevant APC), the terms of reuse of such Open Access shall be governed by a Creative Commons licence – details of these licences and which [Creative Commons](#) licence will apply to this Work are set out in our licence referred to above.

Other than as permitted in any relevant BMJ Author's Self Archiving Policies, I confirm this Work has not been accepted for publication elsewhere, is not being considered for publication elsewhere and does not duplicate material already published. I confirm all authors consent to publication of this Work and authorise the granting of this licence.

1  
2  
3 Analysis of change in patient reported outcome measures with floor and ceiling effects using the  
4 multi-level Tobit model: A simulation study and an example from a National Joint Register using  
5 body mass index and the Oxford Hip Score.  
6  
7

8 Adrian Sayers<sup>1,2</sup>, Michael R Whitehouse<sup>1,3</sup>, Andrew Judge<sup>1,3</sup>, Alexander Macgregor<sup>4</sup>, Ashley W  
9 Blom<sup>1,3</sup>, Yoav Ben-Shlomo<sup>2</sup>.  
10  
11

12 Author affiliations:  
13

- 14 1. Musculoskeletal Research Unit, Bristol Medical School, 1st Floor Learning & Research  
15 Building, Southmead Hospital, Bristol, BS10 5NB, United Kingdom
- 16 2. Population Health Sciences, Bristol Medical School, Canynge Hall, 39 Whatley Road  
17 Bristol, BS8 2PS, United Kingdom
- 18 3. National Institute for Health Research Bristol Biomedical Research Centre, University of  
19 Bristol  
20 Bristol
- 21 4. Norwich Medical School, University of East Anglia, Norwich, United Kingdom  
22  
23  
24  
25

26 Corresponding Author  
27

28 Adrian Sayers  
29

30 Musculoskeletal Research Unit, Bristol Medical School, 1st Floor Learning & Research  
31 Building, Southmead Hospital, Bristol, BS10 5NB, United Kingdom  
32

33 Email: [adrian.sayers@bristol.ac.uk](mailto:adrian.sayers@bristol.ac.uk) Tel: 0117 4147880 Conflict of Interest: The authors have no  
34 conflict of interests  
35  
36  
37  
38  
39  
40  
41  
42  
43  
44  
45  
46  
47  
48  
49  
50  
51  
52  
53  
54  
55  
56  
57  
58  
59  
60



## **Abstract (290 Words)**

### **Objectives**

Analysis of pre/post intervention change in observational studies using Patient Reported Outcome Measures (PROMs) is often believed to be a trivial exercise, and guidance for analysis of data from randomised controls trials is often applied. This is often inappropriate, and that analysis of change scores may be preferable. However, it is unclear if this is suitable in outcomes with floor and ceiling effects. We investigate the association between body mass index (BMI) and the efficacy of primary hip replacement.

### **Design**

Simulation study and prospective national medical device register

### **Setting**

National register of joint replacement and medical devices

### **Methods**

Using a Monte-Carlo simulation study and data from a national joint replacement register (162,513 patients with pre/post surgery PROMs) we investigate simple approaches for the analysis of outcomes with floor and ceiling effects that are measured at two occasions: linear and Tobit regression (baseline adjusted ANCOVA, change-score analysis, post-score analysis) in addition to linear and multi-level Tobit models.

### **Primary outcome**

The primary outcome of interest is change in patient reported outcome measures from pre-surgery to 6 months post-surgery.

### **Results**

Analysis of data with floor and ceiling effects with models that fail to account for these features induce substantial bias. Single level Tobit models only correct for floor or ceiling effects when the exposure of interest is not associated with the baseline score. In observational data scenarios, only multi-level Tobit models are capable of providing unbiased inferences.

### **Conclusions**

Inferences from pre/post studies that fail to account for floor and ceiling effects may induce spurious associations with substantial risk of bias. Multi-level Tobit models indicate the efficacy of total hip replacement is independent of BMI. Restricting access to total hip replacement based on a patients BMI can not be supported by the data.

## **Strengths and limitations of this study**

- We use a simulation study and large prospective study set to investigate the effect of floor and ceiling effects in the analysis of change in patient reported outcome measure pre- and post-surgery.
- We demonstrate that multi-level Tobit models generate unbiased estimates of change in patient reported outcome measures with floor and ceiling effects.
- Simple change score and baseline adjusted ANCOVA generate estimates that are biased in non-randomised experiments.
- We demonstrate the efficacy of total hip replacement is independent of a patient's BMI, and restriction to joint replacement based on a patient's BMI can not be supported by the data.

## **Keywords**

Multi-level Tobit Model, Change Scores, Epidemiologic Methods, Arthroplasty, Patient Reported Outcome Measures, Longitudinal Studies

## **Introduction**

In many non-randomised experiments, researchers are interested in assessing how change in health status is associated with a covariate of interest. Whilst there is much guidance available on assessing change in randomised experiments, and extensive discussion with respect to efficiency and bias [1-9], the guidance in non-randomised studies is less clear. The principle difference is that in observational studies we do not expect balance between different levels of an exposure at baseline, in addition to expecting imbalance in other confounding factors. Glymour et al. advocate the use of, simple analysis of, change scores (SACS) without baseline adjustment to achieve unbiased causal effect estimates using causal arguments presented through Directed Acyclic Graphs (DAGS) [10]. They briefly suggest that in settings with floor and/or ceiling effects, that standard change analyses with and without baseline adjustment are both biased, and non-standard analyses based on Tobit models (censored regression) may ameliorate floor and ceiling problems. The degree to which Tobit models ameliorate the problems caused by floor and ceiling effects is unclear. Some authors suggest that using percentage change is one strategy to avoid dealing with floor and ceiling effects, but Twisk highlighted that this simply represents a linear transformation of change [11], and therefore does not deal with the problem of floor and ceiling effects. Twisk also describes the use of a longitudinal (multi-level) Tobit regression model to appropriately account for floor and ceiling effects in studies with repeated measures [12]. However, since its publication in 2009 there have only be a handful of analyses that use multi-level Tobit models[13-16], suggesting that lack of familiarity with these methods or understanding of when they can and should be applied has deterred analysts in their use, or when they can be applied.

Multi-level Tobit models are now incorporated in mainstream statistical software packages, such as Stata. Given their accesibility, they could arguably be used more frequently than they are. This is relavent considering that the use of measurement instruments with floor and ceiling effects are omnipresent in health related research. Examples include outcomes in health related quality of life (e.g. EQ5D, SF-36, SF-12), psychological wellbeing (e.g Hospital Anxiety and Depression Scale (HADS), Edinburgh Postnatal Depression Scale (EPDS)), and disease specific measures of wellbeing (e.g. Western Ontario and McMaster Universities Osteoarthritis Index (WOMAC) and Oxford Hip Score (OHS) as used in patients with osteoarthritis). Despite this, there is very little guidance available with respect to the consequences of using measurement instruments with floor or ceiling effects, when attempting to make inferences about the effect of an exposure on the change (between two time points) of an outcome of interest.

In this paper we use a Monte-Carlo simulation study to compare the performance of multi-level linear and Tobit models, Ordinarily Least Squares (OLS) regression and single-level Tobit regression, with and without adjustment for baseline scores, in the analysis of change in three different non-

1  
2  
3 randomised experiments, and a randomised experiment. We also demonstrate the use of these models  
4 using real world data from a large national joint replacement register.  
5  
6

7 We motivate the simulation and exemplar data analysis using an example from joint replacement  
8 research describing the association between body mass index (BMI) and the change in a disease  
9 specific patient reported outcome measure (PROM), the Oxford Hip Score (OHS). The issue is  
10 contentious in the UK [17-19] and USA [20] as some organisations suggest restricting joint-  
11 replacement to patients based on their BMI, citing an increased risk of revision surgery and lack of  
12 efficacy of surgery. The small increase in absolute risk of revision in obese patients, must be balanced  
13 against the other benefits of joint replacement, including a reduction in pain and improved physical  
14 functioning. Therefore, it is of interest to clinicians, policy makers, and patients to know the relative  
15 effect of obesity on the efficacy of total hip replacement compared to “normal weight patients”.  
16  
17  
18  
19  
20  
21  
22  
23  
24  
25  
26  
27  
28  
29  
30  
31  
32  
33  
34  
35  
36  
37  
38  
39  
40  
41  
42  
43  
44  
45  
46  
47  
48  
49  
50  
51  
52  
53  
54  
55  
56  
57  
58  
59  
60

## **Methods**

### **Simulation Study Aims**

We investigated the performance of four different methods of analysis, when estimating the effect of an exposure (BMI) on change in response (PROM) before and after total hip replacement with floor and ceiling effects using the Aims, Data Generating Process (DGP), Methods, Estimand, Performance (ADMEP) approach recommended by Morris et al. [21].

### **Data Generating Process (DGP)**

We simulated longitudinal data of “well-being” before and after surgery. We assume that “well-being” is a latent, truly continuous and stable construct which is measured imperfectly by the OHS. Measurement error and floor/ceiling effects are then added to the latent construct to illustrate their consequences.

We assume the response, well-being, is a latent construct ( $y_{ij}^*$ ) measured at the  $i^{\text{th}}$  occasion, where  $i$  varies from 0 (pre-surgery) to 1 (1 year post-surgery), for the  $j^{\text{th}}$  individual is modelled as a linear function of time.  $x_{0j}$  is mean-centred BMI categories according to WHO criteria i.e. -2 = BMI<18.5 (under weight), -1=18.5<BMI≤25 (normal), 0=25<BMI≤30 (overweight), 1=30<BMI≤35 (obese), and 2= BMI>35 (morbidly obese), i.e.  $x_{0j}=0$  is a patient with a BMI classed as overweight.

$$y_{ij}^* = \beta_0 + u_{0j} + (\beta_1 + u_{1j})t_{ij} + \beta_2 x_{0j} + \beta_3 x_{0j} t_{ij} \quad 1$$

$$\begin{bmatrix} u_{0j} \\ u_{1j} \end{bmatrix} \sim N(0, \Omega_u), \quad \Omega_u = \begin{bmatrix} \sigma_{u0}^2 & \\ \sigma_{u01} & \sigma_{u1}^2 \end{bmatrix}$$

where  $t_{ij}$  is the time at which measurement  $i$  was taken on individual  $j$ , coded as 0 at pre-surgery and 1 post-surgery.  $\beta_0$  is the baseline population average response for a patient with average BMI, and  $u_{0j}$  represents the  $j^{\text{th}}$  individual difference from the baseline response. The sum of  $\beta_0 + u_{0j}$  is the individual baseline response for a patient with average BMI.  $\beta_1$  represents the population average change per unit increase in time for a patient with average BMI, and  $u_{1j}$  represents the  $j^{\text{th}}$  individual difference from the population average change per unit increase in time. The sum  $\beta_1 + u_{1j}$  is the individual average change per unit increase in time for a patient with average BMI.  $\beta_2$  represents the effect of a 1-unit increase in the exposure ( $x_{0j}$ ) of interest (BMI) pre-surgery and  $\beta_3$  represents the effect of a 1-unit increase in BMI ( $x_{0j}$ ) on the pre-post surgery change in well-being ( $y_{ij}^*$ ). The variance in individual deviations from the population average response at baseline and the average rate of change are  $\sigma_{u0}^2$  and  $\sigma_{u1}^2$  respectively. The covariance between baseline measurements and rate of change is characterised by  $\sigma_{u01}$  (with correlation  $\rho_{u01}$ ).

Under the assumption of linear change, data was simulated from a multi-level model with a random intercept and slope, see Figure 1 for an illustration of a patient trajectory with an average BMI.

<Figure 1 Here>

The observed response without floor and ceiling effects ( $y_{ij}$ ) is simulated by adding measurement error in the linear trajectory,  $\varepsilon_{ij}$ , to the latent response, where  $\varepsilon_{ij} \sim N(0, \sigma_\varepsilon^2)$ .

$$y_{ij} = y_{ij}^* + \varepsilon_{ij} \quad 2$$

A response with floor and ceiling effects  $y_{ij}^{FC}$  is simulated by restricting the response to lie between 0 and 48.

$$y_{ij}^{FC} = \begin{cases} 0 & \text{if } y_{ij} \leq 0 \\ y_{ij} & \text{if } 0 < y_{ij} < 48 \\ 48 & \text{if } y_{ij} \geq 48 \end{cases} \quad 3$$

See Figure 2 for a graphical illustration of the trajectory generation: we first simulate  $y_{ij}^*$ , then add some measurement error ( $\varepsilon_{ij}$ ) to yield an observed response ( $y_{ij}$ ), and finally add floor and ceiling effects to obtain the observed truncated response ( $y_{ij}^{FC}$ ).

<Figure 2 Here>

We compared 4 DGPs to illustrate a range of scenarios by manipulating  $\beta_2$ ,  $\beta_3$ , and  $\rho_{u01}(\sigma_{u01})$  to influence the association between pre- and post-surgery outcomes.  $\beta_0$ ,  $\beta_1$ ,  $\sigma_{u0}$ ,  $\sigma_{u1}$ , and  $\sigma_{\varepsilon_{ij}}$  were fixed at 10, 40, 10, 15 and 3 respectively. **DGP 1** is a null model, where there is a baseline effect of the exposure is  $\beta_2 = -3$ , but the exposure did not influence change over time ( $\beta_3 = 0$ ), and there is no correlation between baseline values and subsequent change ( $\rho_{u01} = 0$ ).

**DGP 2** replicates a simple randomised trial where there is no difference between levels of the exposure at baseline ( $\beta_2 = 0$ ), but the exposure did influence change over time ( $\beta_3 = -3$ ), and there is no correlation between baseline values and subsequent change ( $\rho_{u01} = 0$ ). **DGP 3** and **DGP 4** replicate a cohort study, where there is a difference between levels of the exposure at baseline ( $\beta_2 = -3$ ), and the exposure also influenced change over time ( $\beta_3 = -3$ ). **DGP 3** specified no correlation between baseline values and subsequent change ( $\rho_{u01} = 0$ ), whereas **DGP 4** specified a negative correlation between baseline values and change ( $\rho_{u01} = -0.5$ ), reflecting the fact the joint-replacement surgery has the tendency to normalise an individuals well-being, see Figure 3 for an illustration of the associated trajectories.

<Figure 3 Here>

We conducted a Monte-Carlo simulation with 1000 replicated datasets, each with 10,000 patients. A balanced dataset, i.e. 3 data points for each individual, was simulated to ensure identification of the

linear and Tobit multi-level models occurred, i.e. two data points allows estimation of baseline and change parameters but not measurement error. The middle data point was then dropped to replicate a pre/post design.

### Method of analysis

For data sets with 3 measurement occasions, a linear multi-level model and a multi-level Tobit model (MLTM) that reflects the data generating process were fitted to the data, see equation 1.

In datasets with 2 measurement occasions, i.e. a pre-post design, single-level OLS and Tobit models were fitted to the data. Tobit models were only used when floor and ceiling effects had been simulated. Three different models were explored:

1) A simple model for post surgery well-being.

$$y_{1j}^{FC} = \alpha_1 + \alpha_2 x_{0j} + \varepsilon_j \quad 4$$

2) A Simple Analysis of Change Score (SACS).

$$(y_{1j}^{FC} - y_{0j}^{FC}) = \alpha_6 + \alpha_7 x_{0j} + \varepsilon_j \quad 5$$

3) A model for change adjusted for baseline i.e. baseline adjusted ANCOVA. This model is equivalent to a model for the post score adjusted for baseline ANCOVA, with the exception of the interpretation of the intercept.

$$(y_{1j}^{FC} - y_{0j}^{FC}) = \alpha_8 + \alpha_9 x_{0j} + \alpha_{10} y_{0j}^{FC} + \varepsilon_j \quad 6$$

In addition, an under-identified MLTM model, equivalent to equation 1 with constrained error variance  $\sigma_\varepsilon^2$  was fitted in the spirit of a sensitivity analysis, where  $\sigma_\varepsilon^2$  was constrained to a value from 5, 10, 15, 20, 25 and 30.

### Estimand

The estimand of interest is the population average effect of the interaction between the exposure and change in slope i.e.  $\beta_3$  the pre-post surgery change in well-being. We test whether the exposure modifies the improvement post-surgery (i.e. the null hypothesis that  $\beta_3 = 0$ ).

### Performance

The performance of each method was explored in terms of bias, coverage, empirical standard error, model based standard error, mean square error, relative error and relative precision.

**National Joint Registry of England, Wales, Northern Ireland, and the Isle of Man (NJR)**

1  
2  
3 Using data from the NJR, we investigated the association between BMI and a patient reported  
4 outcome measure, the OHS, in patients undergoing elective total hip replacement (THR) between 1<sup>st</sup>  
5 April 2003 and 22<sup>nd</sup> February 2017.  
6  
7

### 8 **Patient and public involvement**

9  
10 Patient representatives sit on the committee structure of the National Joint Registry. The  
11 research priorities of the National Joint Registry are identified by this committee structure  
12 and approved by the patient representatives. Patients were not involved in the setting of the  
13 research question or the outcome measures, nor were they involved in designing or  
14 implementing this work or interpretation of the results. We are unable to disseminate results  
15 of this study directly to study participants due to the anonymous nature of the data. We plan  
16 to disseminate our findings to the National Joint Registry, via their communications team, to  
17 relevant to the provision of joint replacement and to the general population through the local  
18 and national press.  
19  
20  
21  
22  
23  
24  
25

### 26 **Data source**

27  
28 The NJR commenced data collection in April 2003; at inception it was mandatory for all THRs  
29 conducted in the private sector to be entered into the NJR, and from 2011 all THR procedures in the  
30 public and private sector were required to be entered into the NJR. A recent national audit of data  
31 entered into the NJR between 2014 and 2015 estimated data capture of 95% for primary THR and  
32 91% for revision THR.  
33  
34  
35  
36

### 37 **Inclusion/exclusion criteria**

38  
39 All consenting patients undergoing THR were eligible to be included in the analysis. Patients were  
40 included if their patient history was unique and consistent, i.e. contained no duplicates, revision prior  
41 to primary, or currently held in query by the submitting unit. Due to the requirement for reliable date  
42 information, patients who were indicated to have died prior to undergoing a procedure, were more  
43 than 110 years of age, had undergone a procedure prior to their date of birth, or received a procedure  
44 prior to 2003 were excluded from the analysis. Only primary THRs, where the primary indication for  
45 operation was osteoarthritis (OA) with unique prosthesis combinations were included in the analysis.  
46 All THRs with metal-on-metal bearing combinations were excluded from the analysis due to the  
47 exceptionally high failure rate in this group[22, 23]. Patients who were less than 50 years of age at the  
48 date of the index THR were also excluded, due to the high likelihood that these cases are due to OA  
49 secondary to other pathology.  
50  
51  
52  
53  
54  
55

56 See Supplementary.Figure 1 and Supplementary.Figure 2 for a detailed breakdown of inclusion  
57 criteria and missing data.  
58  
59  
60



### Primary outcome

The primary outcome of interest in this study is change in OHS after surgery. Linked National PROMs were first available in 2009, see Supplementary.Figure 3 for details of linkage.

### Primary exposure

The primary exposure of interest in this study is BMI. BMI was introduced into the second “Minimal Data Set” in 2004. Patients with BMI between 10 and 60 were included in the analysis. BMI measures were excluded as implausible if height and weight measures were less than 130cm and weight less than 30kg respectively. See Supplementary.Figure 2.

### Confounding factors

Pre-operative confounding factors were thematically organised into groups: 1) Patient factors included sex, American Society of Anesthesiologists (ASA) grade, and operation funder. 2) Operation factors included fixation, approach, patient position during surgery, anaesthetic type, thromboprophylaxis regime, bearing, and year of primary THR. 3) The setting of the treatment episode (i.e. private or NHS hospital). 4) Consultant based factors included the training status of the primary surgeon performing the operation. 5) Deprivation factors were based on the English indices of multiple deprivation (an area based index of deprivation).

### Statistical analyses

Means, standard deviations and interquartile points were used to describe continuous variables. Frequencies and percentages were used to describe categorical variables.

The association between change in PROMS score was investigated using the same single-level methods and the ML Tobit model with constrained error variances described in the simulation study as an exemplar. In addition, we conducted more comprehensive analyses using restricted cubic splines to model the BMI association in the ML Tobit model with constrained variance, single-level linear and Tobit SACS, ANCOVA, and Post score models. In the ML Tobit model, BMI was modelled with restricted cubic splines at baseline and its interaction with time. Correspondingly, we adjusted OHS for patient and deprivation confounding factors at baseline and operation, setting and confounding factors with an interaction with time i.e. operative factors and settings influence the change in outcome but not the baseline response. In single-level models, the effect of BMI was modelled using restricted cubic splines and adjusted for confounding factors using standard regression approaches.

### Missing data

Due to the method of data collection in the national PROMS program, item non-response is masked. Defacto mean imputation of up to two missing items in the OHS occurred automatically. In addition,

1  
2  
3 despite valid values appearing with individual OHS items, if the questionnaire was marked as “not  
4 complete”, implausible overall scores were obtained. For simplicity only patients with complete pre-  
5 operative and post-operative PROMS were used in the analysis. BMI is missing in a substantial  
6 proportion of the cohort. Patients prior to 2004 did not have BMI recorded, and the proportion of  
7 patients with missing BMI in 2004 is large. In 2009 ~40% of patients did not have BMI recorded; this  
8 reduced year on year and in 2016 was ~18% of eligible patients.  
9  
10  
11  
12

13 For pedagogic simplicity we use complete-case analyses throughout.  
14  
15  
16  
17

## 18 **Results**

### 19 **Simulation Study**

20  
21  
22 Figure 4 illustrate the results from the MC simulation for each DGP. It is clear that MLM, OLS  
23 methods, and in DGP’s 1, 3, and 4 (observational scenarios) single-level Tobit models all exhibit  
24 substantial bias. Only the ML Tobit with 3 datapoints provides unbiased estimates in all scenarios.  
25 Constrained ML Tobit models are close to being unbiased, but slightly over estimate the effect size,  
26 see Table 1, Single-level Tobit models also provide unbiased estimates for DGP 2 (the randomised  
27 trial).  
28  
29  
30  
31

32  
33 Figure 5 illustrates the spread of model based standard errors (SE) for each method by DGP. It is clear  
34 that the variation and absolute magnitude of SE in MLM with 3 data points per person is less than that  
35 of ML Tobit Models. Similarly, model based SEs from OLS methods are smaller and less variable  
36 than single-level Tobit methods. In DGP 2, the randomised trial, it is interesting to note that the SE  
37 from Tobit ANCOVA models are marginally smaller than for Tobit SACS. Whilst there is little  
38 difference in terms of bias from the constrained ML Tobit models, see Figure 4, the size and  
39 variability of estimated SEs increased with increasing value of the constrained of  $\sigma_{\varepsilon}^2$ .  
40  
41  
42  
43

44  
45 Supplementary.Figure 4, 5, 6, 7, 8, 9, 10, 11, 12, 13, 14, and 15, illustrate the coverage of 95%  
46 confidence intervals in each DGP. Unsurprisingly, coverage of methods which demonstrate bias is  
47 very poor, whilst coverage is at nominal levels for the ML Tobit model with three data points. The  
48 results from constrained ML Tobit indicate coverage less than the nominal levels. Coverage less than  
49 the advertised levels is principally due to the bias in estimate. However, when the estimates from the  
50 model are unbiased, as in DGP 2 with  $\sigma_{\varepsilon}^2=5$ , coverage is poor, suggesting bias in model based SE, i.e.  
51 they are too small.  
52  
53  
54  
55

### 56 **National Joint Registry of England, Wales, Northern Ireland, and the Isle of Man.**

57  
58 Following application of inclusion and exclusion criteria, there were 162,513 patients with pre and  
59 post-operative OHS available for analysis. Figure 6 illustrates the results of the exemplar dataset using  
60

1  
2  
3 different approaches whilst attempting to estimate the effect of BMI category on the efficacy of  
4 surgery, whereas Figure 7 and Figure 8 illustrate the use of restricted cubic splines to assess the same  
5 question.  
6  
7

### 8 Exemplar Analysis

9  
10 A single-level OLS SACS approach suggests a positive association between BMI and change in OHS  
11 i.e. patients with greater BMIs have greater gains in well-being, whereas OLS ANCOVA and OLS  
12 post score models suggest a negative association. The single-level Post model score is approximately  
13 50% greater than the ANCOVA model. All single-level Tobit models suggest a negative association  
14 between BMI and OHS. The Tobit SACS model is the smallest, with both the Tobit ANCOVA and  
15 Post models estimating substantially larger effects. The constrained ML Tobit models all provide  
16 equivalent (to 2 decimal places) results, suggesting there is no effect of BMI on the change in OHS  
17 pre and post surgery, see Figure 6.  
18  
19

### 20 Restricted Cubic Spline Approach

21  
22 Crude analyses, which model BMI using restricted cubic splines, illustrate a complex association  
23 between BMI and pre-operative OHS. A ~4.5 point reduction in OHS is observed as BMI increases  
24 between 20 and 50 kg.m<sup>2</sup>. However, the change in OHS between pre- and post- surgery is very  
25 weakly associated with pre-operative BMI, with individuals with BMI's <25 kg.m<sup>2</sup> and >45 kg.m<sup>2</sup>  
26 receiving modestly greater gains than those patients with an average BMI of 28 kg.m<sup>2</sup>. However, with  
27 less than ½ a unit variation across the range of BMI observed in the cohort, the difference falls well  
28 below anything that could be considered clinically meaningful, see Figure 7. Following adjustment for  
29 patient factors, operation factors, centre factors, consultant factors, and deprivation there was little  
30 difference in the pattern of change compared to crude results, see Figure 7. Single-level approaches  
31 are illustrated in Figure 8, with OLS and Tobit models giving similar patterns of results. ANCOVA  
32 and the post model specification suggest a strong inverse association with BMI, with obese  
33 individuals receiving less improvement following surgery. OLS SACS indicate that obesity is  
34 associated with greater gains in OHS following surgery. Conversely, Tobit SACS models indicate that  
35 obesity is associated with smaller gains in OHS following surgery.  
36  
37  
38  
39  
40  
41  
42  
43  
44  
45  
46  
47  
48  
49  
50

### 51 Discussion

52  
53 The results of the simulation study clearly illustrate that, in the presence of floor and ceiling effects,  
54 neither baseline adjustment, or simple analysis of change scores (SACS) will yield unbiased estimates  
55 of the effect of an exposure on the outcome of interest. Single-level modifications to account for floor  
56 and ceiling effects such as the Tobit model only work in the context of a randomised trial, i.e. when  
57 there is no difference between baseline values by BMI. Importantly, single-level methods, OLS and  
58  
59  
60

1  
2  
3 Tobit models, induce significant bias, with negligible coverage, when  $\beta_3 = 0$  i.e. there is no change in  
4 the pre- post- surgery well being by BMI. Fully identified MLTM with three measurement  
5 occasions, return unbiased estimates with coverage close to advertised levels. In pre- post- designs  
6  
7  
8 with two measurement occasions ML Tobit models, with constrained level 1 variances, return  
9  
10 estimates very close to being unbiased, but coverage is less than advertised indicating bias in the  
11 model based standard errors.  
12

13  
14 The simulation study is consistent with a lay intuition with respect to analyses of floor and ceiling  
15 effects. Assuming we accept that either the MLM and OLS change analyses are appropriate in the  
16 absence of floor and ceiling effects, DGP 1 illustrates that when there is no effect of obesity on the  
17 efficacy of surgery, the addition of an artificial ceiling compresses the gain of individuals towards the  
18 top of the distribution. Due to the baseline association between obesity and well-being, underweight  
19 individuals tend to have gains that are more compressed compared to obese individuals. This  
20 inevitably induces bias, and provides evidence of a change in pre- post- surgery wellbeing by BMI,  
21 where none actually exist. Similarly, in DGP 2 (no baseline differences) where there is truly an  
22 interaction effect, will also lead to biased estimates. The DGP used in the simulation assumes  
23 underweight individuals benefit more from surgery than heavier individuals, which results in a  
24 fanning out of the trajectories. Underweight individuals have truly greater gains than obese  
25 individuals, but these gains are underestimated due to the ceiling effect, resulting in bias towards the  
26 null. In DGPs 3 and 4 (baseline differences in BMI, and interaction between BMI and change) we see  
27 a more extreme pattern of results compared to DGP 2, but overall consistency with the expected  
28 response of compressing individual gains which have initially higher starting values.  
29  
30  
31  
32  
33  
34  
35  
36

37  
38 In the exemplar analysis of NJR data, the pattern of results is very similar to that of DGP 1 of the  
39 simulation, suggesting that results of the simulation are likely to be replicated in real world datasets.  
40 The more comprehensive analysis of the NJR data, using RCS to reflect the continuous nature of  
41 BMI, aptly illustrate where the effects from mis-specified single-level models are arising from. The  
42 ML Tobit model illustrates a strong negative association between BMI and pre-operative OHS, and  
43 failing to account for these baseline differences appropriately when attempting to estimate change  
44 leads to variation at baseline being incorporated in the estimate of change. Furthermore, the ability to  
45 adjust both baseline and post-surgical OHS for their pronounced floor and ceiling effects respectively,  
46 leads to unbiased estimates of the effect of interest. Unfortunately, due to the constraints on the level 1  
47 variance, interpretation of the random effects are difficult, as they depend on the magnitude of the  
48 variance applied in the constraint, see Supplementary.Figure 16. However, the models clearly  
49 illustrate that change in PROMS following THR do not depend on BMI, and surgery appears to be  
50 effective for patients regardless of their BMI.  
51  
52  
53  
54  
55  
56  
57  
58

## 59 **Conclusion**

1  
2  
3 Floors and ceilings in PROM instruments have somewhat predictable effects on estimated coefficients  
4 from standard OLS models that do not adjust for floor or ceiling effects, assuming the true underlying  
5 association is known. As this is rarely the case, it is important to consider a variety of different data  
6 generating processes to explore the likely impact on an analysis. It is important to consider the  
7 validity of the assumptions underpinning the Tobit model, i.e. that the latent response is truly  
8 continuous and that there is a true ceiling just beyond the range of the measurement being used.  
9  
10

11  
12  
13 Single-level Tobit models do not ameliorate floor and ceiling effects in simple analysis of change  
14 scores. However, ML Tobit models appear to recover the effects of interest under specific  
15 assumptions. The analysis of pre- post- designs require further constraints to ensure models are fully  
16 identified. The difference between analytical approaches can profoundly alter the interpretation of  
17 the model parameters, and this may have serious consequences if used to generate policy  
18 inappropriately. For example, inappropriate analyses that fail to consider data generating process  
19 appropriately may lead to the restriction of joint replacement for overweight or obese patients.  
20  
21  
22

23  
24  
25 When designing a study to investigate the effect of an exposure on change in health status, it would be  
26 preferable to use a measurement instrument that does not have floor or ceiling effects as inference is  
27 less complicated, and design trumps analysis in most scenarios. If the use of measurement instrument  
28 with floor and ceiling effects is unavoidable, it is preferable to collect data at 3 time points which  
29 ensure models are fully identified, alleviating the need to constrain level 1 variance in order to  
30 identify models, again design trumps analysis. If retrospective analysis of pre-post data sets are  
31 required, it appears that using ML Tobit model with constrained level 1 error variance would be  
32 preferable to single-level approaches.  
33  
34  
35  
36  
37

38  
39 Broadly speaking the analyses of this simulation are in agreement with the work of Glymour et al.,  
40 that analysis of change and its interaction with an exposure at baseline, should not be adjusted for  
41 baseline measurements in observational data. The presence of floor and ceiling effects in data requires  
42 additional assumptions which makes things marginally more complex.  
43  
44

### 45 **Author Contributions**

46 AS, MRW, AJ, AM, AWB, and YBS were responsible for the study design, AS conducted  
47 the data analysis. AS, MRW, AJ, AM, AWB, and YBS were responsible for interpreting  
48 the data. AS, MRW, AJ, AM, AWB, and YBS prepared and edited and approved the final  
49 manuscript.  
50  
51  
52  
53

### 54 **Competing interests statement**

55 We declare no competing interests  
56  
57  
58  
59

### 60 **Funding**

1  
2  
3 AS is funded by an MRC Strategic Skills Fellowship MR/L01226X/1  
4  
5

6 This study was supported by the NIHR Biomedical Research Centre at University Hospitals Bristol  
7  
8 NHS Foundation Trust and the University of Bristol. The views expressed in this publication are those  
9  
10 of the author(s) and not necessarily those of the NHS, the National Institute for Health Research or the  
11  
12 Department of Health and Social Care.  
13  
14

### 15 **Data Sharing Statement**

16  
17 Access to the data can be made via research requests to the National Joint Registry of England, Wales,  
18  
19 Northern Ireland and the Isle of Man. Full details can be found at  
20  
21 <http://www.njrcentre.org.uk/njrcentre/Research/Research-requests>  
22  
23  
24  
25  
26  
27  
28  
29  
30  
31  
32  
33  
34  
35  
36  
37  
38  
39  
40  
41  
42  
43  
44  
45  
46  
47  
48  
49  
50  
51  
52  
53  
54  
55  
56  
57  
58  
59  
60

## Tables

Table 1:

| Model                           | DGP 1: $\beta_3=0$ |          | DGP2 : $\beta_3=-3$ |          | DGP 3: $\beta_3=-3$ |          | DGP 4 : $\beta_3=-3$ |          |
|---------------------------------|--------------------|----------|---------------------|----------|---------------------|----------|----------------------|----------|
| Estimate                        |                    |          |                     |          |                     |          |                      |          |
| MLM                             | 1.1                | (0.0024) | -1.36               | (0.0023) | -0.26               | (0.0024) | -0.23                | (0.0025) |
| ML Tobit                        | -0.0056            | (0.0038) | -3.03               | (0.0037) | -3.04               | (0.0037) | -3.01                | (0.0037) |
| ML Tobit $\sigma_\epsilon^2=5$  | -0.13              | (0.0044) | -3.01               | (0.0042) | -3.13               | (0.0046) | -2.57                | (0.0038) |
| ML Tobit $\sigma_\epsilon^2=10$ | -0.093             | (0.0044) | -3.09               | (0.0042) | -3.14               | (0.0045) | -3.05                | (0.0041) |
| ML Tobit $\sigma_\epsilon^2=15$ | -0.057             | (0.0044) | -3.09               | (0.0042) | -3.12               | (0.0045) | -3.11                | (0.0043) |
| ML Tobit $\sigma_\epsilon^2=20$ | -0.04              | (0.0044) | -3.08               | (0.0042) | -3.11               | (0.0045) | -3.12                | (0.0044) |
| ML Tobit $\sigma_\epsilon^2=25$ | -0.031             | (0.0044) | -3.07               | (0.0042) | -3.1                | (0.0045) | -3.11                | (0.0044) |
| ML Tobit $\sigma_\epsilon^2=30$ | -0.026             | (0.0044) | -3.07               | (0.0042) | -3.09               | (0.0045) | -3.1                 | (0.0045) |
| OLS SACS                        | 1.1                | (0.0024) | -1.36               | (0.0023) | -0.26               | (0.0024) | -0.23                | (0.0025) |
| OLS ANCOVA                      | -0.31              | (0.0022) | -1.36               | (0.002)  | -1.69               | (0.0021) | -2.43                | (0.0019) |
| OLS Post                        | -1.36              | (0.0023) | -1.36               | (0.0022) | -2.72               | (0.0023) | -2.69                | (0.0018) |
| Tobit SACS                      | -0.72              | (0.0044) | -3.04               | (0.0041) | -3.78               | (0.0044) | -4.83                | (0.0048) |
| Tobit ANCOVA                    | -0.5               | (0.0046) | -3.09               | (0.0042) | -3.61               | (0.0045) | -5.5                 | (0.0042) |
| Tobit Post                      | -3.07              | (0.0049) | -3.06               | (0.0047) | -6.13               | (0.005)  | -6.14                | (0.004)  |
| Coverage                        |                    |          |                     |          |                     |          |                      |          |
| MLM                             | 0                  | (0)      | 0                   | (0)      | 0                   | (0)      | 0                    | (0)      |
| ML Tobit                        | 94.8               | (0.7)    | 95.3                | (0.67)   | 93.9                | (0.76)   | 95.4                 | (0.66)   |
| ML Tobit $\sigma_\epsilon^2=5$  | 67.5               | (1.48)   | 86.7                | (1.07)   | 71.6                | (1.43)   | 4.6                  | (0.66)   |
| ML Tobit $\sigma_\epsilon^2=10$ | 83.5               | (1.17)   | 85                  | (1.13)   | 77.4                | (1.32)   | 92.2                 | (0.85)   |
| ML Tobit $\sigma_\epsilon^2=15$ | 91.1               | (0.9)    | 87.7                | (1.04)   | 85.7                | (1.11)   | 86.8                 | (1.07)   |
| ML Tobit $\sigma_\epsilon^2=20$ | 92.7               | (0.82)   | 90                  | (0.95)   | 88.2                | (1.02)   | 87.1                 | (1.06)   |
| ML Tobit $\sigma_\epsilon^2=25$ | 93.4               | (0.79)   | 91.6                | (0.88)   | 89.5                | (0.97)   | 88.2                 | (1.02)   |
| ML Tobit $\sigma_\epsilon^2=30$ | 93.6               | (0.77)   | 91.9                | (0.86)   | 91.1                | (0.9)    | 88.9                 | (0.99)   |
| OLS SACS                        | 0                  | (0)      | 0                   | (0)      | 0                   | (0)      | 0                    | (0)      |
| OLS ANCOVA                      | 0.8                | (0.28)   | 0                   | (0)      | 0                   | (0)      | 0                    | (0)      |
| OLS Post                        | 0                  | (0)      | 0                   | (0)      | 2.4                 | (0.48)   | 0                    | (0)      |
| Tobit SACS                      | 0.1                | (0.1)    | 94.4                | (0.73)   | 0                   | (0)      | 0                    | (0)      |
| Tobit ANCOVA                    | 7.2                | (0.82)   | 89.7                | (0.96)   | 1.2                 | (0.34)   | 0                    | (0)      |
| Tobit Post                      | 0                  | (0)      | 93.3                | (0.79)   | 0                   | (0)      | 0                    | (0)      |
| Model SE                        |                    |          |                     |          |                     |          |                      |          |
| MLM                             | 0.074              | (2E-05)  | 0.074               | (2E-05)  | 0.077               | (2E-05)  | 0.078                | (2E-05)  |
| ML Tobit                        | 0.12               | (3E-05)  | 0.12                | (3E-05)  | 0.12                | (3E-05)  | 0.12                 | (3E-05)  |
| ML Tobit $\sigma_\epsilon^2=5$  | 0.1                | (3E-05)  | 0.1                 | (3E-05)  | 0.11                | (3E-05)  | 0.11                 | (4E-05)  |
| ML Tobit $\sigma_\epsilon^2=10$ | 0.12               | (3E-05)  | 0.12                | (3E-05)  | 0.13                | (4E-05)  | 0.12                 | (3E-05)  |
| ML Tobit $\sigma_\epsilon^2=15$ | 0.13               | (4E-05)  | 0.13                | (4E-05)  | 0.14                | (4E-05)  | 0.13                 | (3E-05)  |
| ML Tobit $\sigma_\epsilon^2=20$ | 0.13               | (5E-05)  | 0.13                | (5E-05)  | 0.14                | (5E-05)  | 0.14                 | (4E-05)  |
| ML Tobit $\sigma_\epsilon^2=25$ | 0.14               | (5E-05)  | 0.13                | (5E-05)  | 0.14                | (6E-05)  | 0.14                 | (5E-05)  |
| ML Tobit $\sigma_\epsilon^2=30$ | 0.14               | (5E-05)  | 0.13                | (5E-05)  | 0.15                | (6E-05)  | 0.14                 | (5E-05)  |
| OLS SACS                        | 0.074              | (2E-05)  | 0.074               | (2E-05)  | 0.077               | (2E-05)  | 0.078                | (2E-05)  |
| OLS ANCOVA                      | 0.07               | (2E-05)  | 0.065               | (2E-05)  | 0.072               | (2E-05)  | 0.059                | (2E-05)  |
| OLS Post                        | 0.07               | (2E-05)  | 0.07                | (2E-05)  | 0.072               | (2E-05)  | 0.055                | (2E-05)  |
| Tobit SACS                      | 0.13               | (5E-05)  | 0.13                | (5E-05)  | 0.14                | (6E-05)  | 0.15                 | (6E-05)  |
| Tobit ANCOVA                    | 0.14               | (6E-05)  | 0.14                | (6E-05)  | 0.15                | (6E-05)  | 0.13                 | (6E-05)  |
| Tobit Post                      | 0.15               | (7E-05)  | 0.15                | (6E-05)  | 0.16                | (7E-05)  | 0.13                 | (6E-05)  |



1  
2  
3  
4  
5  
6  
7  
8  
9  
10  
11  
12  
13  
14  
15  
16  
17  
18  
19  
20  
21  
22  
23  
24  
25  
26  
27  
28  
29  
30  
31  
32  
33  
34  
35  
36  
37  
38  
39  
40  
41  
42  
43  
44  
45  
46  
47  
48  
49  
50  
51  
52  
53  
54  
55  
56  
57  
58  
59  
60

For peer review only



## Figure Legends

Figure 1: Graphical illustration of a multi-level random intercept and slope model used to generate data for a individual with average BMI.

Figure 2: Graphical illustration of the data generating process of the latent, measured, and measured response with floor and ceiling effects. The Latent Response is  $y_{ij}^*$ , the measured response is  $y_{ij}$ , and the measured response with censoring is  $y_{ij}^{FC}$ .

Figure 3: Graphical Illustration of the four Data Generating Processes used to investigate the effect of floor and ceiling effects on analysis of pre-post surgery change with BMI as an exposure. Horizontal red lines at 0 and 48 indicate floor and ceilings of the measurement instrument.

Figure 4: Plot of 1000 estimates by each DGP, for each method of analysis. Within each method, the vertical axis is the repetition number of each simulated dataset. The white pipe symbol is the average of the estimates.

Figure 5: Plot of 1000 estimated Standard Errors by each DGP, for each method of analysis. Within each method, the vertical axis is the repetition number of each simulated dataset. The white pipe symbol is the average of the standard errors.

Figure 6: Estimate and 95% Confidence Intervals of constrained ML Tobit, Single-level OLS and Tobit: ANCOVA, SACS, and Post models.

Figure 7: Estimates and 95% confidence intervals of baseline and change in Oxford Hip Score (OHS) pre and post surgery and its association with Body Mass Index (BMI) adjusted for confounding.

Figure 8: Estimates and 95% confidence intervals of single-level approaches to the analysis of change in Oxford Hip Score (OHS) pre and post surgery and its association with Body Mass Index (BMI) adjusted for confounding.

## References

1. Frison L, Pocock SJ. Repeated measures in clinical trials: analysis using mean summary statistics and its implications for design. *Stat Med.* 1992;11(13):1685-704.
2. Goldstein H. Tutorial in biostatistics-longitudinal data analysis (repeated measures) in clinical trials. *Stat Med.* 2000;19(13):1821.
3. Kaiser L. Adjusting for baseline: change or percentage change? *Stat Med.* 1989;8(10):1183-90.
4. Matthews JN, Campbell MJ. Adjusting for baseline: change or percentage change. *Stat Med.* 1992;11(12):1624-6.
5. Senn S. Repeated measures in clinical trials: analysis using mean summary statistics and its implications for design. *Stat Med.* 1994;13(2):197-8.
6. Senn S. Change from baseline and analysis of covariance revisited. *Stat Med.* 2006;25(24):4334-44. doi:10.1002/sim.2682.
7. Senn S, Stevens L, Chaturvedi N. Repeated measures in clinical trials: simple strategies for analysis using summary measures. *Stat Med.* 2000;19(6):861-77.
8. Vickers AJ. The use of percentage change from baseline as an outcome in a controlled trial is statistically inefficient: a simulation study. *BMC Med Res Methodol.* 2001;1:6.
9. Vickers AJ, Altman DG. Statistics notes: Analysing controlled trials with baseline and follow up measurements. *BMJ.* 2001;323(7321):1123-4.
10. Glymour MM, Weuve J, Berkman LF, Kawachi I, Robins JM. When is baseline adjustment useful in analyses of change? An example with education and cognitive change. *Am J Epidemiol.* 2005;162(3):267-78. doi:10.1093/aje/kwi187.
11. Twisk J. *Applied longitudinal data analysis for epidemiology : a practical guide.* Cambridge: Cambridge University Press; 2004.
12. Twisk J, Rijmen F. Longitudinal tobit regression: a new approach to analyze outcome variables with floor or ceiling effects. *J Clin Epidemiol.* 2009;62(9):953-8. doi:10.1016/j.jclinepi.2008.10.003.
13. Holla JFM, van Beers-Tas MH, van de Stadt LA, Landewe R, Twisk JWR, Dekker J et al. Depressive mood and low social support are not associated with arthritis development in patients with seropositive arthralgia, although they predict increased musculoskeletal symptoms. *RMD Open.* 2018;4(1):e000653. doi:10.1136/rmdopen-2018-000653.
14. Moran LJ, Fraser LM, Sundernathan T, Deussen AR, Louise J, Yelland LN et al. The effect of an antenatal lifestyle intervention in overweight and obese women on circulating cardiometabolic and inflammatory biomarkers: secondary analyses from the LIMIT randomised trial. *BMC Med.* 2017;15(1):32. doi:10.1186/s12916-017-0790-z.
15. Ravona-Springer R, Moshier E, Schmeidler J, Godbold J, Akrivos J, Rapp M et al. Changes in glycemic control are associated with changes in cognition in non-diabetic elderly. *J Alzheimers Dis.* 2012;30(2):299-309. doi:10.3233/JAD-2012-120106.
16. Zhu L, Gonzalez J. Modeling Floor Effects in Standardized Vocabulary Test Scores in a Sample of Low SES Hispanic Preschool Children under the Multilevel Structural Equation Modeling Framework. *Front Psychol.* 2017;8:2146. doi:10.3389/fpsyg.2017.02146.
17. Coombes R. Rationing of joint replacements raises fears of further cuts. *BMJ.* 2005;331(7528):1290. doi:10.1136/bmj.331.7528.1290.
18. Finer N. Rationing joint replacements: trust's decision seems to be based on prejudice or attributing blame. *BMJ.* 2005;331(7530):1472. doi:10.1136/bmj.331.7530.1472-a.
19. McNicol MW. Rationing joint replacements: ...and is false economy resulting in overall damage. *BMJ.* 2005;331(7530):1473. doi:10.1136/bmj.331.7530.1473.
20. Workgroup of the American Association of H, Knee Surgeons Evidence Based C. Obesity and total joint arthroplasty: a literature based review. *J Arthroplasty.* 2013;28(5):714-21. doi:10.1016/j.arth.2013.02.011.
21. Morris T, White I, Crowther M. Using simulation studies to evaluate statistical methods. *Stat Med.* 2019. doi:https://doi.org/10.1002/sim.8086.
22. Smith AJ, Dieppe P, Howard PW, Blom AW, National Joint Registry for E, Wales. Failure rates of metal-on-metal hip resurfacings: analysis of data from the National Joint Registry for England and Wales. *Lancet.* 2012;380(9855):1759-66. doi:10.1016/S0140-6736(12)60989-1.

1  
2  
3 23. Smith AJ, Dieppe P, Vernon K, Porter M, Blom AW, National Joint Registry of E et al. Failure  
4 rates of stemmed metal-on-metal hip replacements: analysis of data from the National Joint Registry  
5 of England and Wales. Lancet. 2012;379(9822):1199-204. doi:10.1016/S0140-6736(12)60353-5.  
6  
7  
8  
9  
10  
11  
12  
13  
14  
15  
16  
17  
18  
19  
20  
21  
22  
23  
24  
25  
26  
27  
28  
29  
30  
31  
32  
33  
34  
35  
36  
37  
38  
39  
40  
41  
42  
43  
44  
45  
46  
47  
48  
49  
50  
51  
52  
53  
54  
55  
56  
57  
58  
59  
60

For peer review only



Latent Response

BMJ Open

Measured response

1  
2  
3  
4  
5  
6  
7

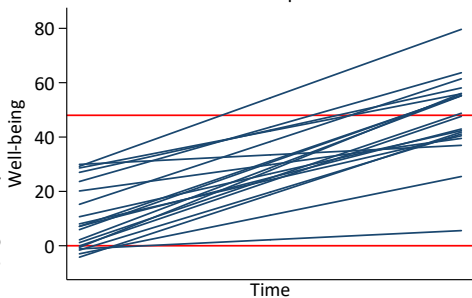

Well-being

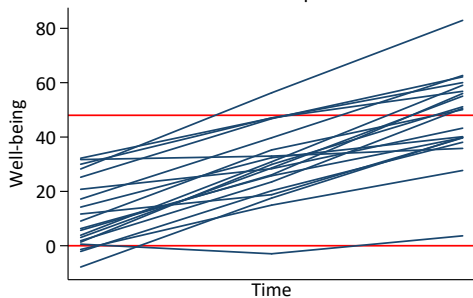

Measured response with censoring

8  
9  
10  
11  
12  
13  
14  
15  
16  
17  
18  
19  
20

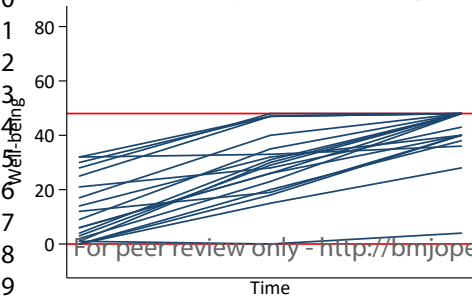

DGP 1:  $\beta_2 = -3, \beta_3 = 0, \rho_{u01} = 0$  BMJ Open

DGP 2:  $\beta_2 = 0, \beta_3 = -3, \rho_{u01} = 0$  Page 24 of 46

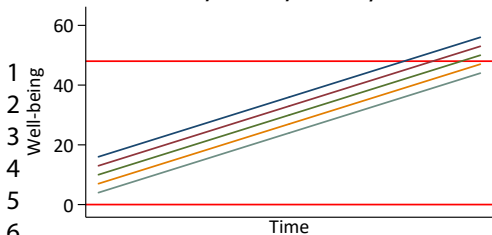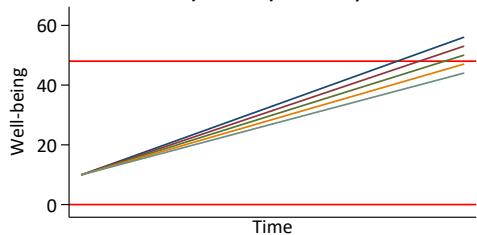

DGP 3:  $\beta_2 = -3, \beta_3 = -3, \rho_{u01} = 0$

DGP 4:  $\beta_2 = -3, \beta_3 = -3, \rho_{u01} = -0.5$

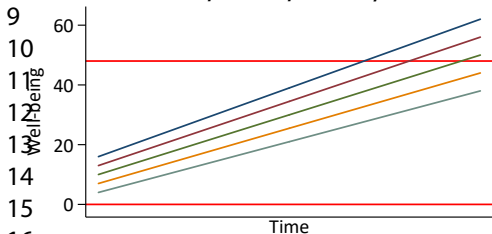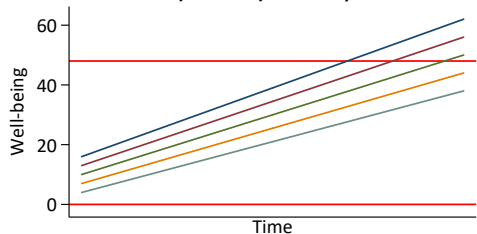

18 For peer review only - <http://bmjopen.bmj.com/site/about/guidelines.xhtml>

19 Under Weight [-2]    Normal [-1]    Overweight [0]    Obese [1]    Morbidly Obese [2]

20

BMJ Open

DGP 1:  $\beta_3=0$

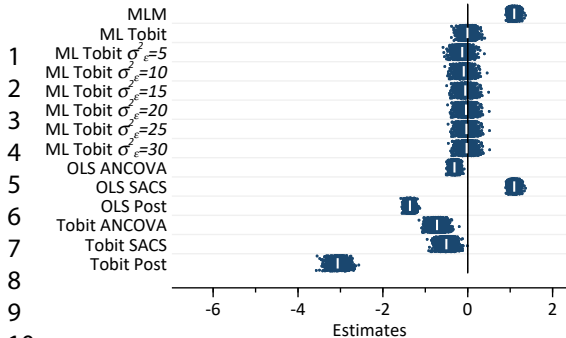

DGP 2:  $\beta_3=-3$

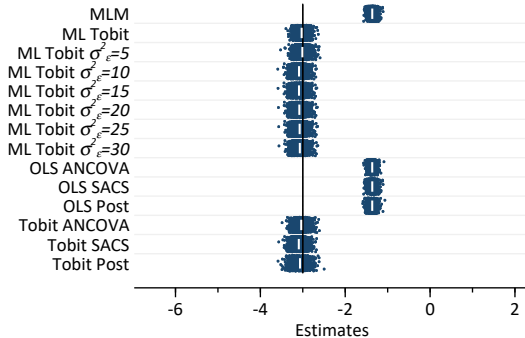

DGP 3:  $\beta_3=-3$

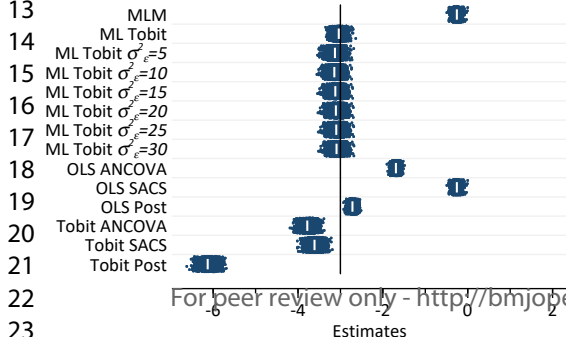

DGP 4:  $\beta_3=-3$

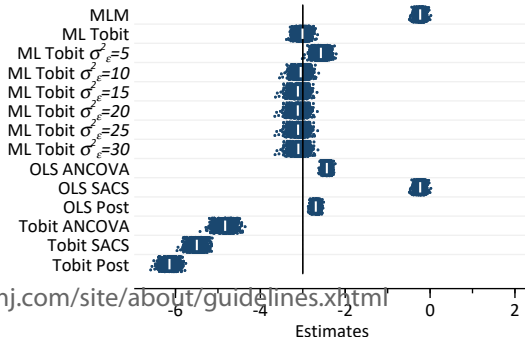

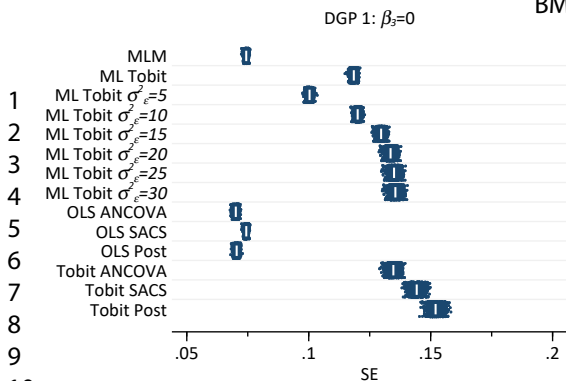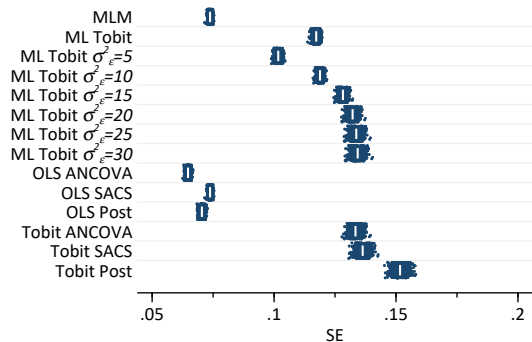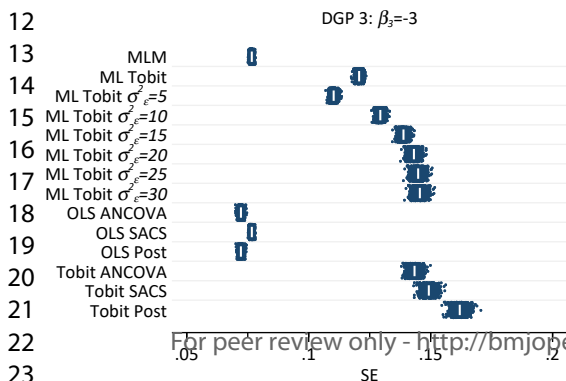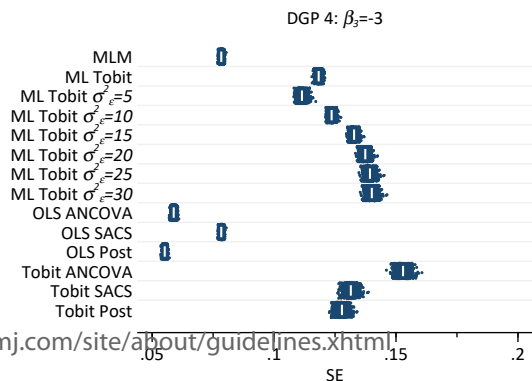



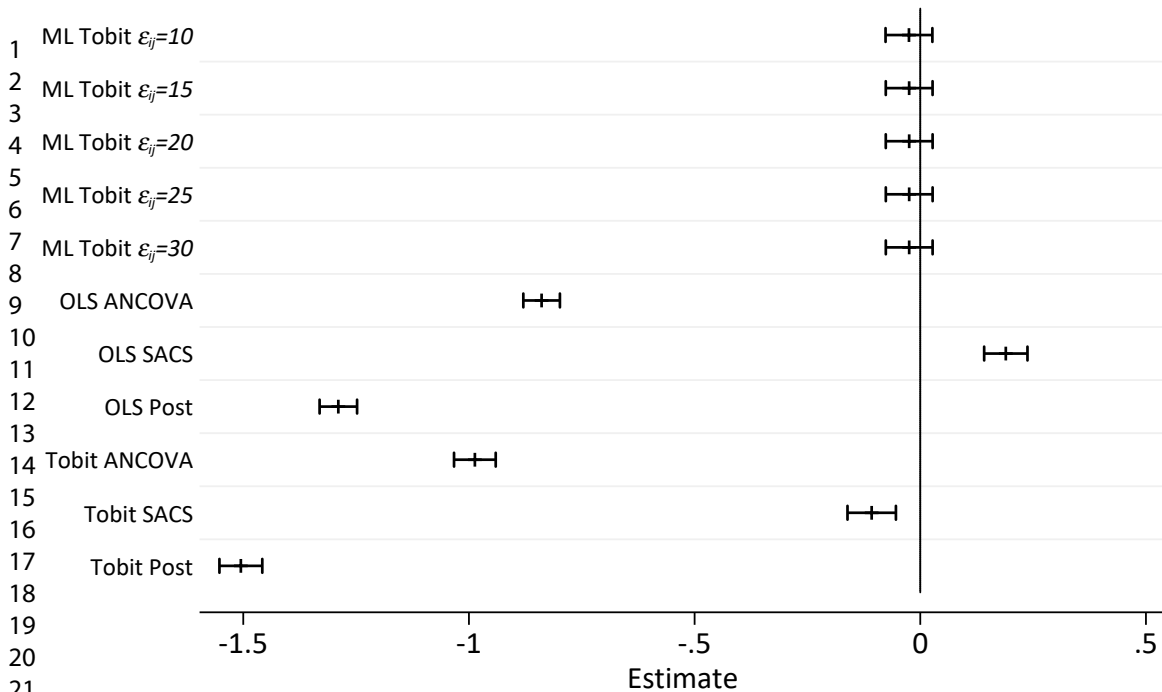

For peer review only - <http://bmjopen.bmj.com/site/about/guidelines.xhtml>

+ Estimate      |-----| 95% CI

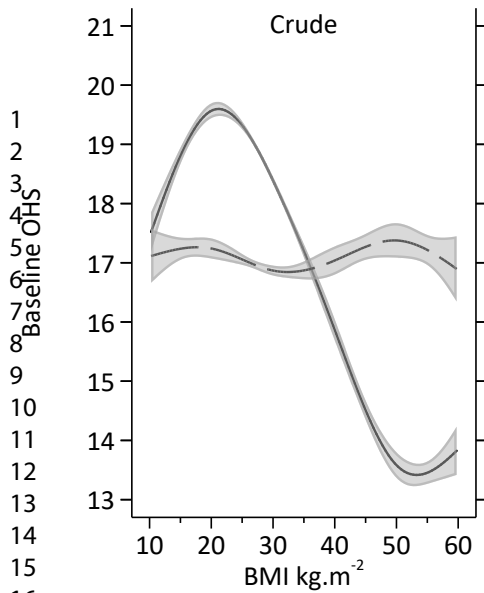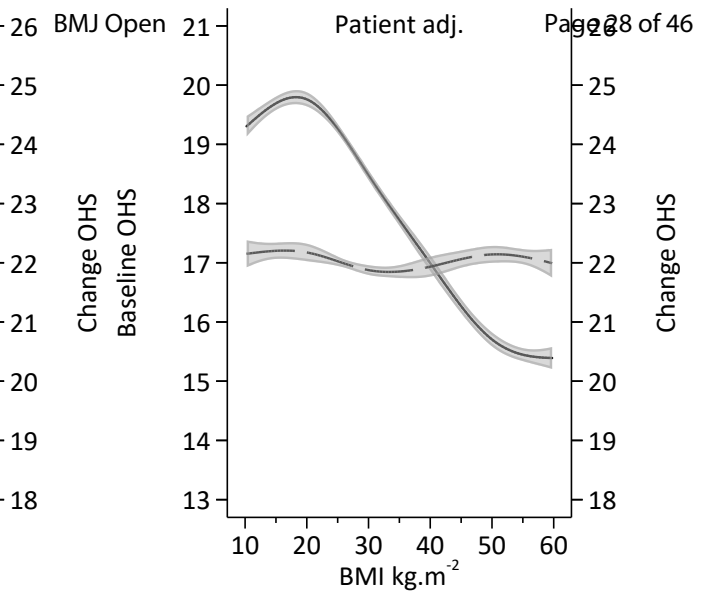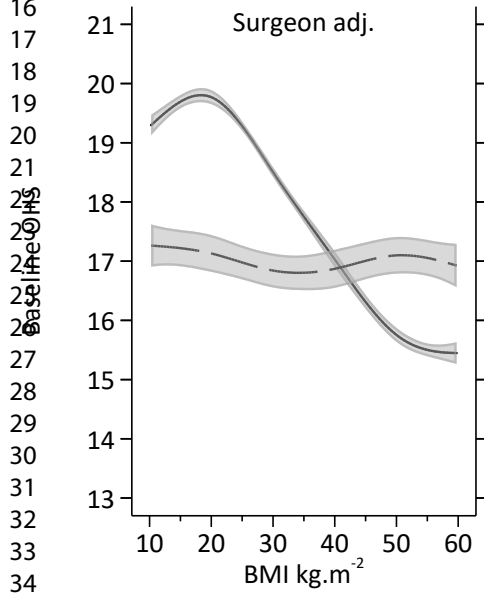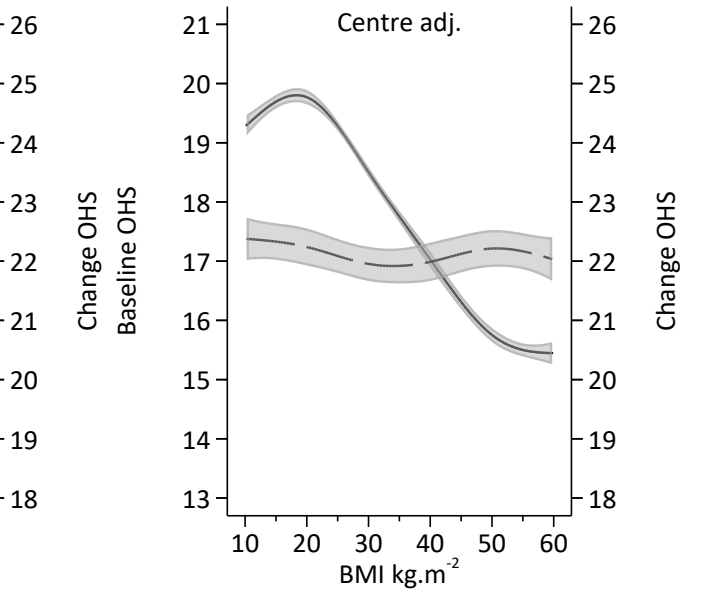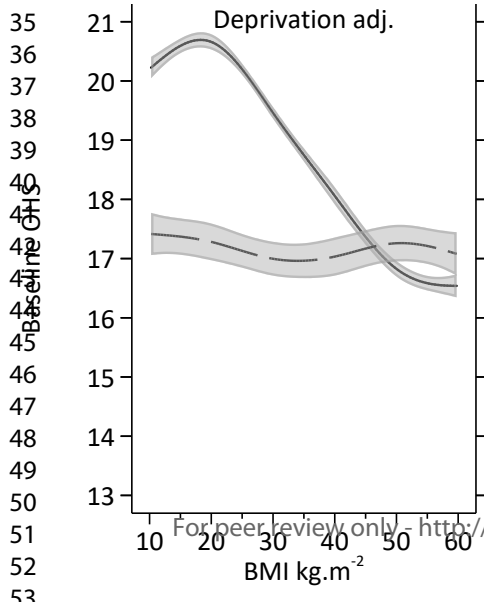

— Baseline  
 [ ] 95% CI  
 - - - Change

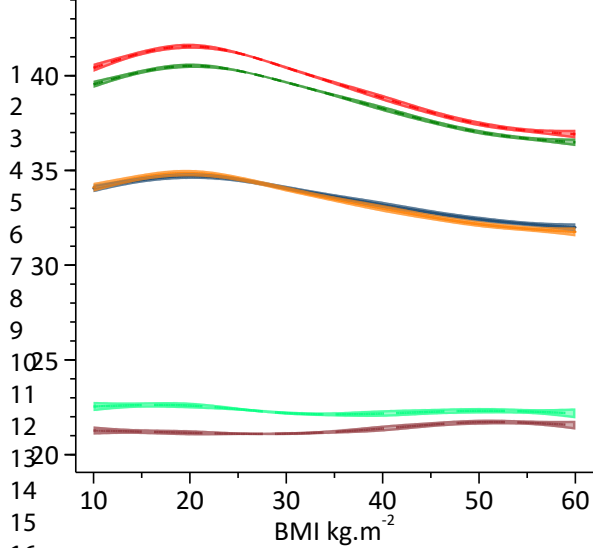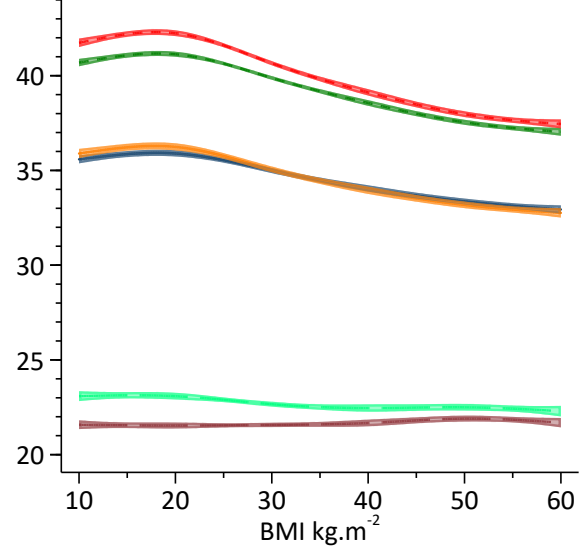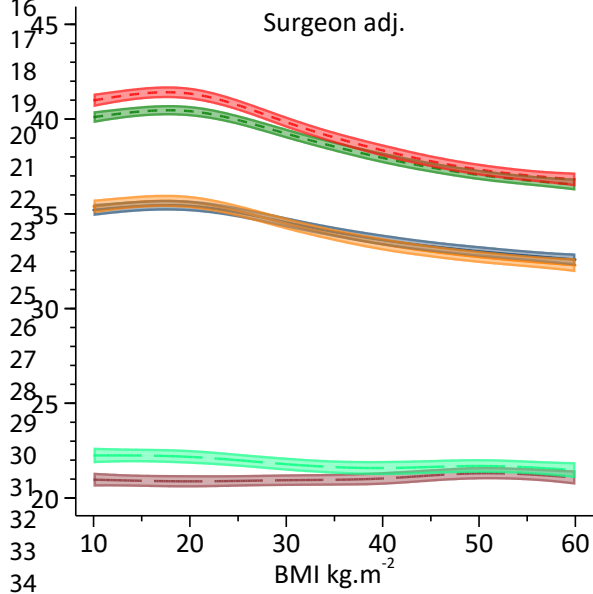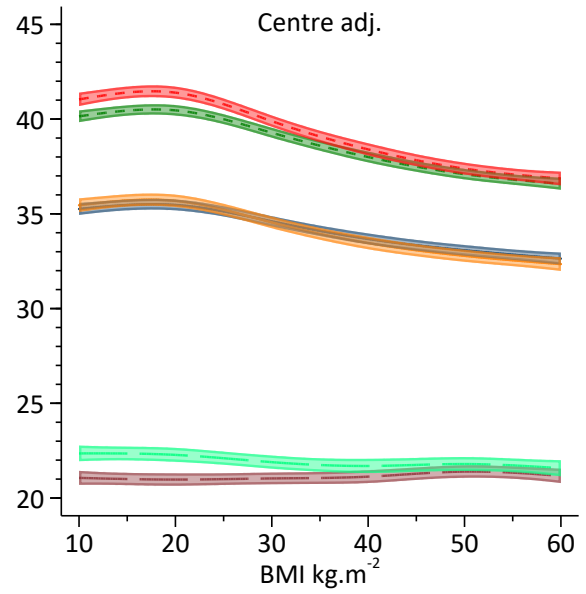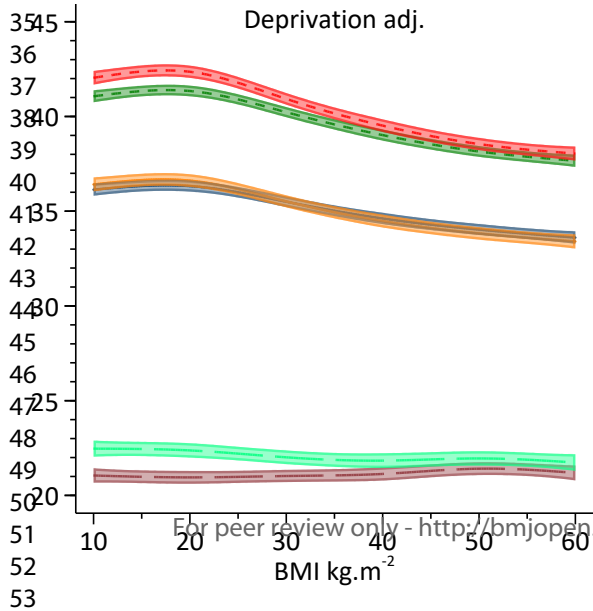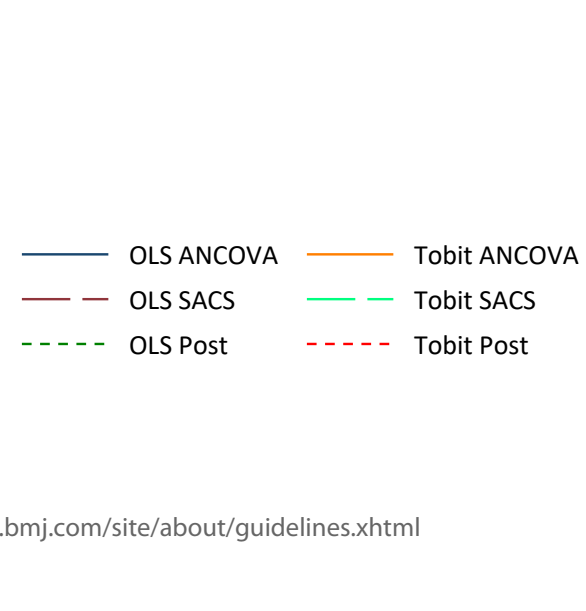

- OLS ANCOVA
- Tobit ANCOVA
- OLS SACS
- Tobit SACS
- - - OLS Post
- - - Tobit Post

**Supplementary Figures**

*Supplementary.Figure 1: Inclusion / Exclusion Criteria of the NJR study.*

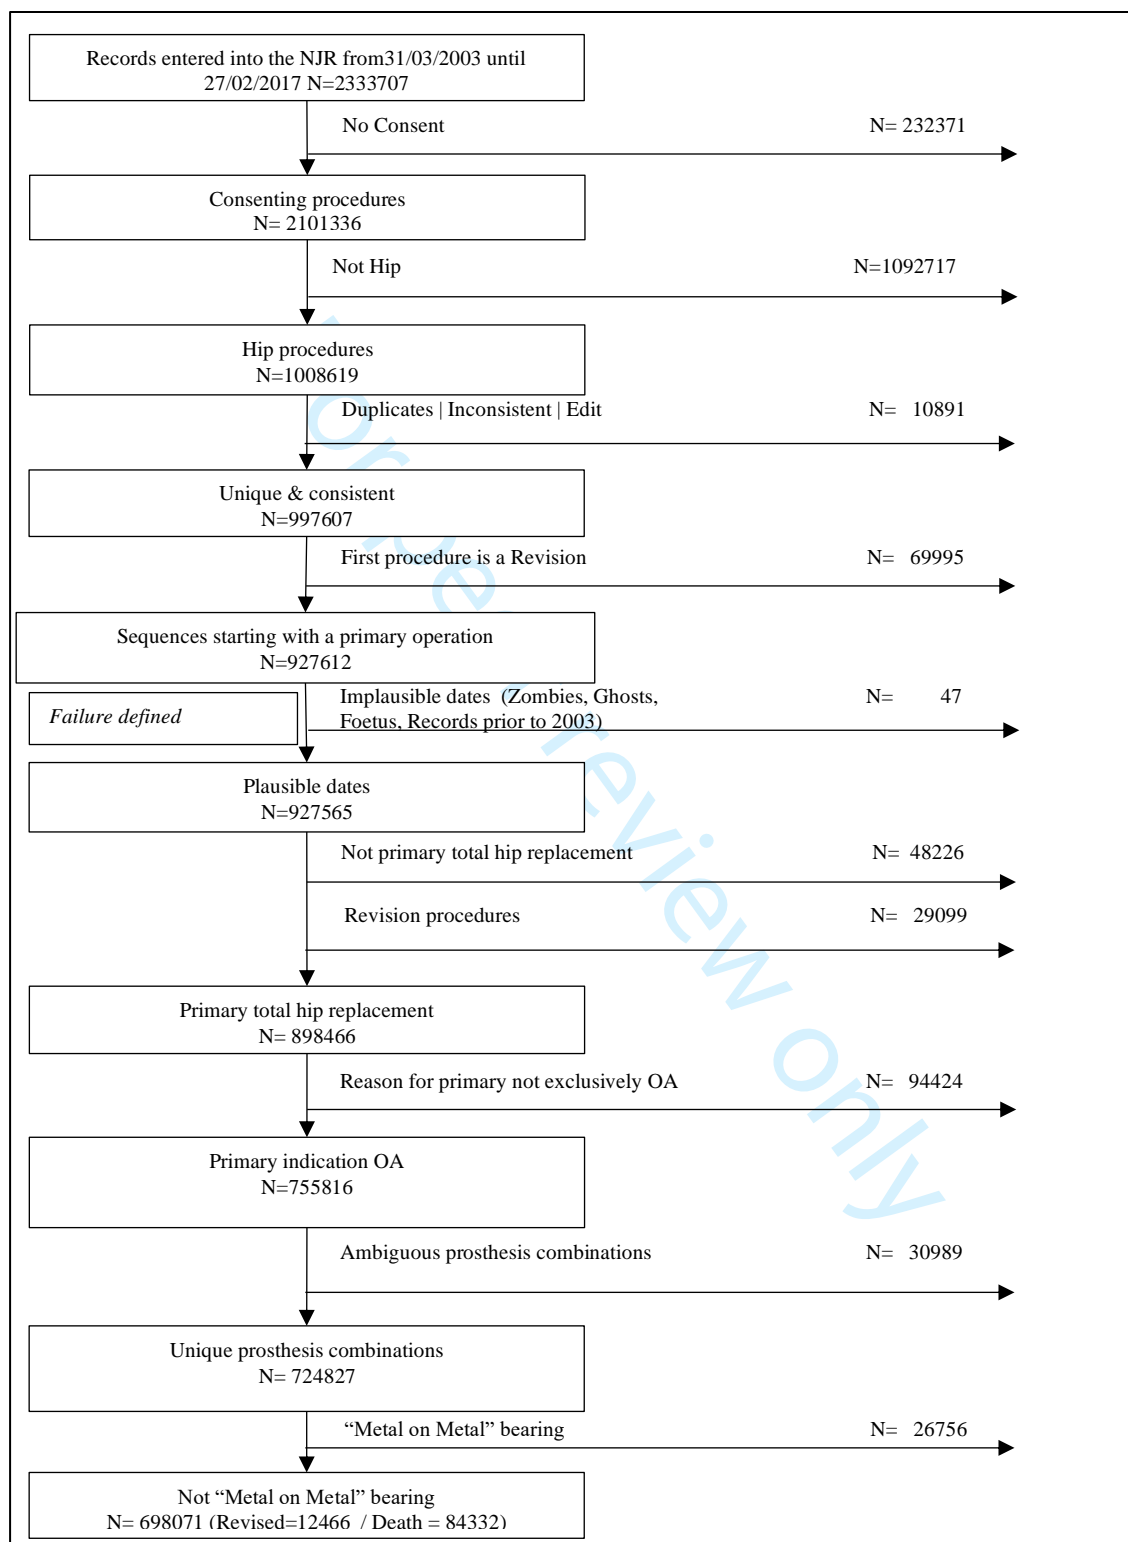

Supplementary.Figure 2: Description of covariate missing data in eligible data

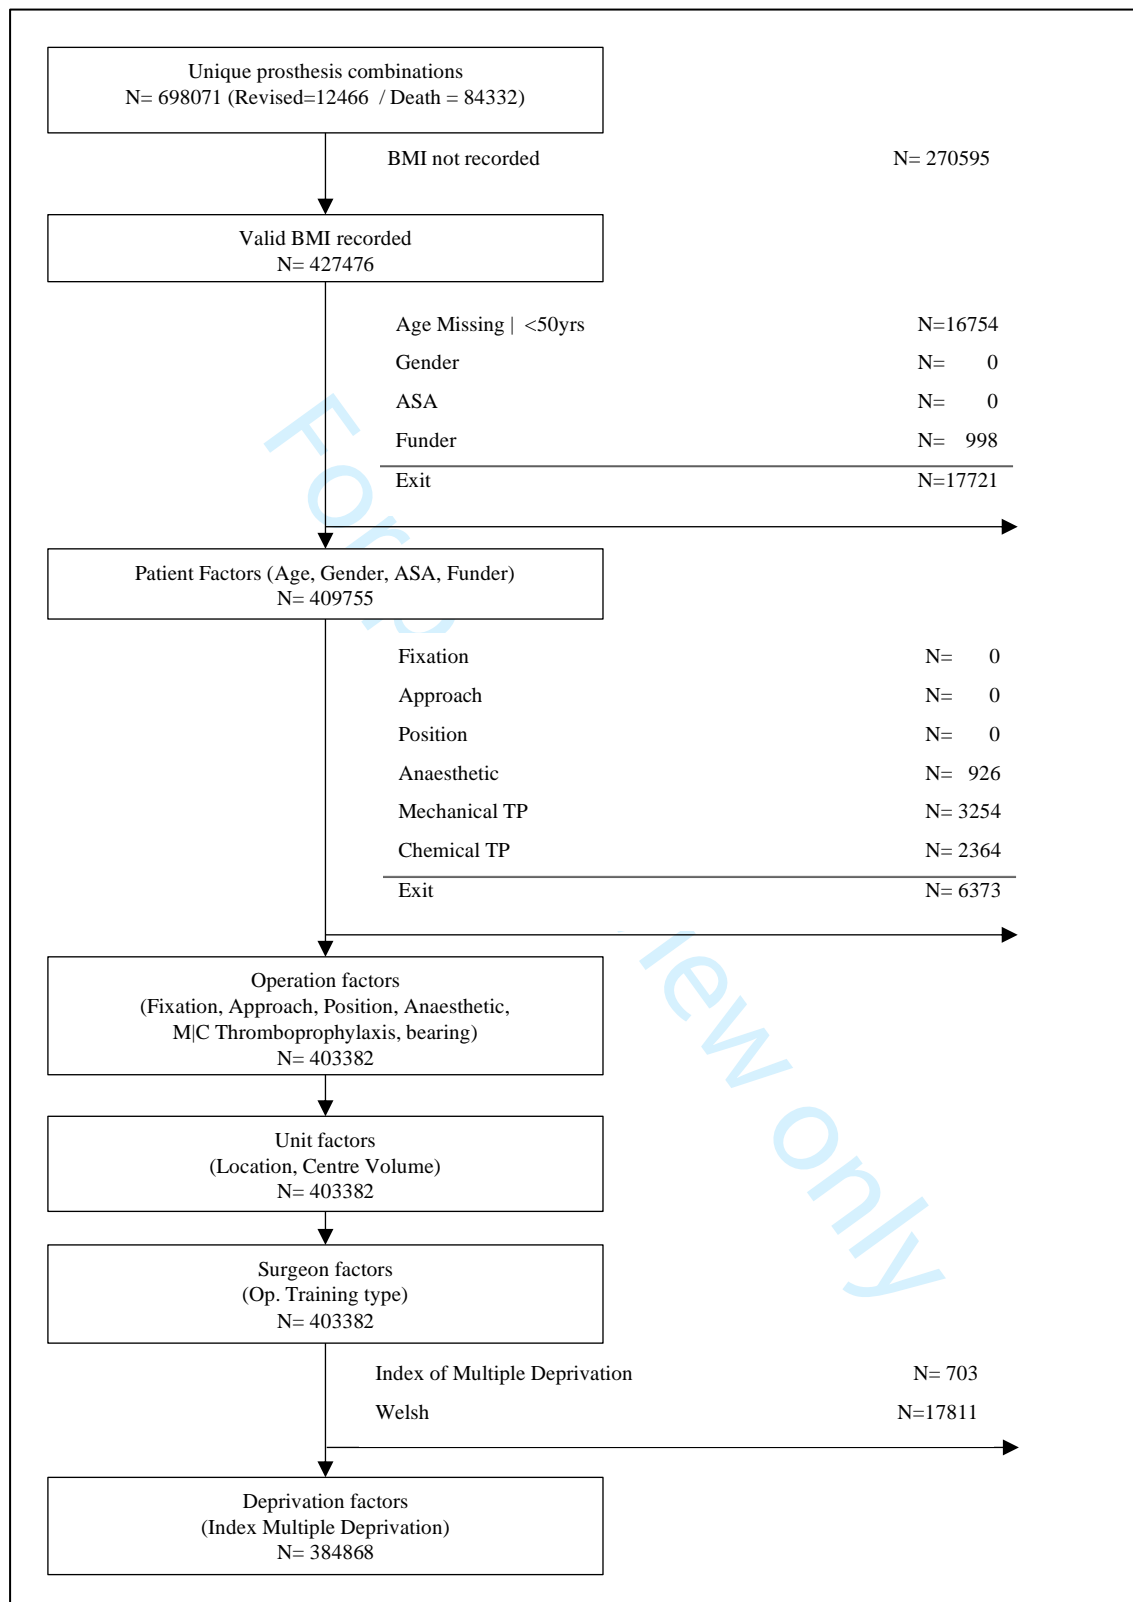

Supplementary. Figure 3: Description of National PROMS linkage to the NJR

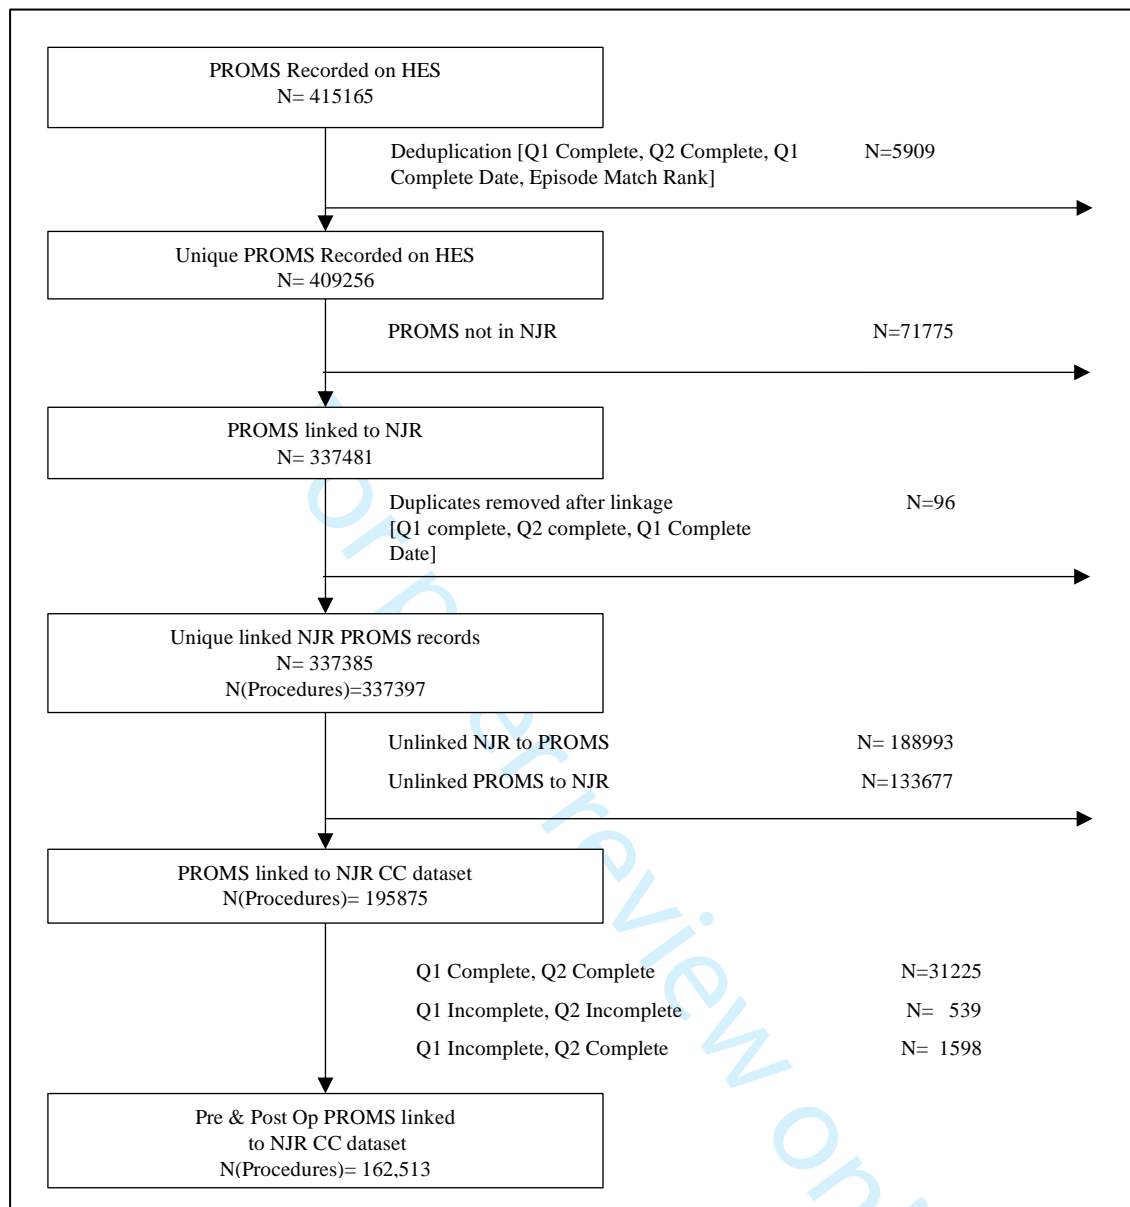

Supplementary Figure 4: "Zip Plot" of the 1000 95% Confidence intervals for each method of analysis for DGP 1. The vertical axis is the centile of the two-sided p-value against  $H_0 : \beta_3=0$  associated with the confidence interval for MLM and ML Tobit models.

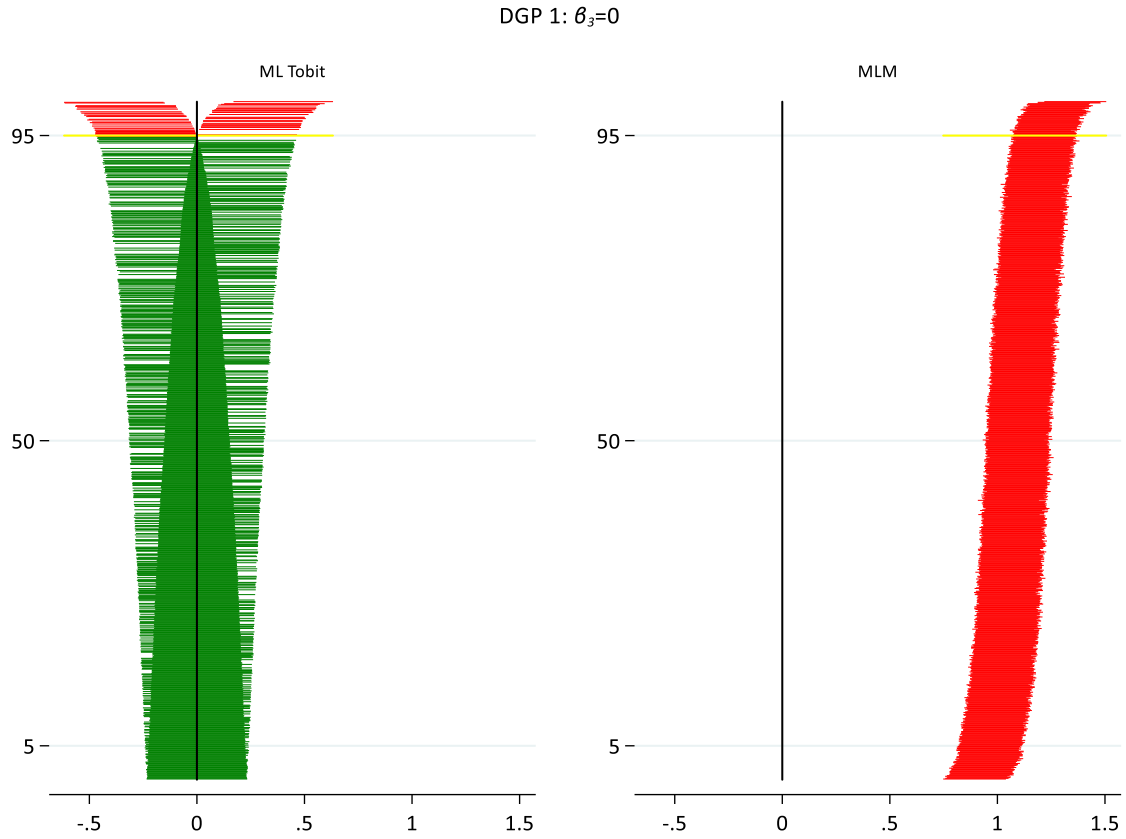

Supplementary Figure 5: “Zip Plot” of the 1000 95% Confidence intervals for each method of analysis for DGP 1. The vertical axis is the centile of the two-sided p-value against  $H_0 : \beta_3=0$  associated with the confidence interval for ML Tobit models with varying constraints of  $\sigma_\varepsilon^2$

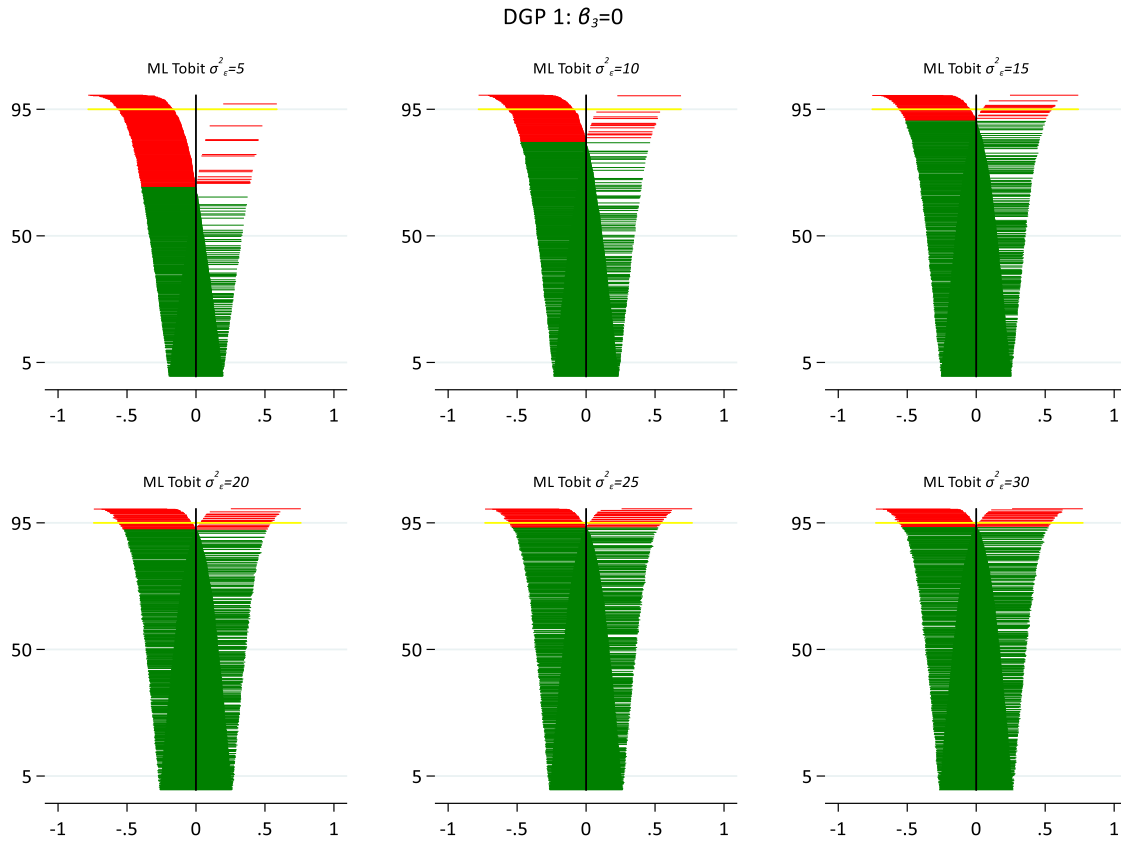

For peer review only



Supplementary.Figure 6: “Zip Plot” of the 1000 95% Confidence intervals for each method of analysis for DGP 1. The vertical axis is the centile of the two-sided p-value against  $H_0 : \beta_3=0$  associated with the confidence interval for Single level OLS and Tobit models.

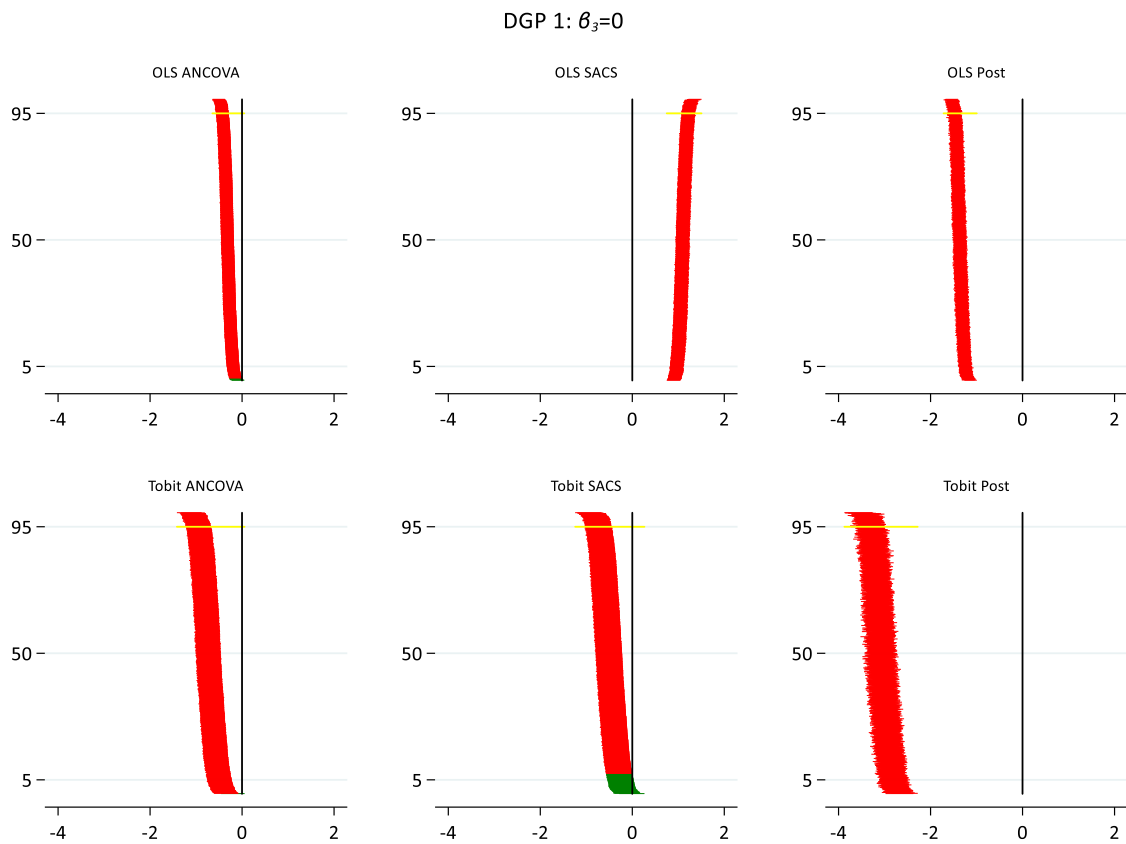

EW Only

1  
2  
3 *Supplementary Figure 7: “Zip Plot” of the 1000 95% Confidence intervals for each method*  
4 *of analysis for DGP 2. The vertical axis is the centile of the two-sided p-value against  $H_0 :$*   
5  *$\beta_3=3$  associated with the confidence interval for MLM and ML Tobit models.*  
6  
7

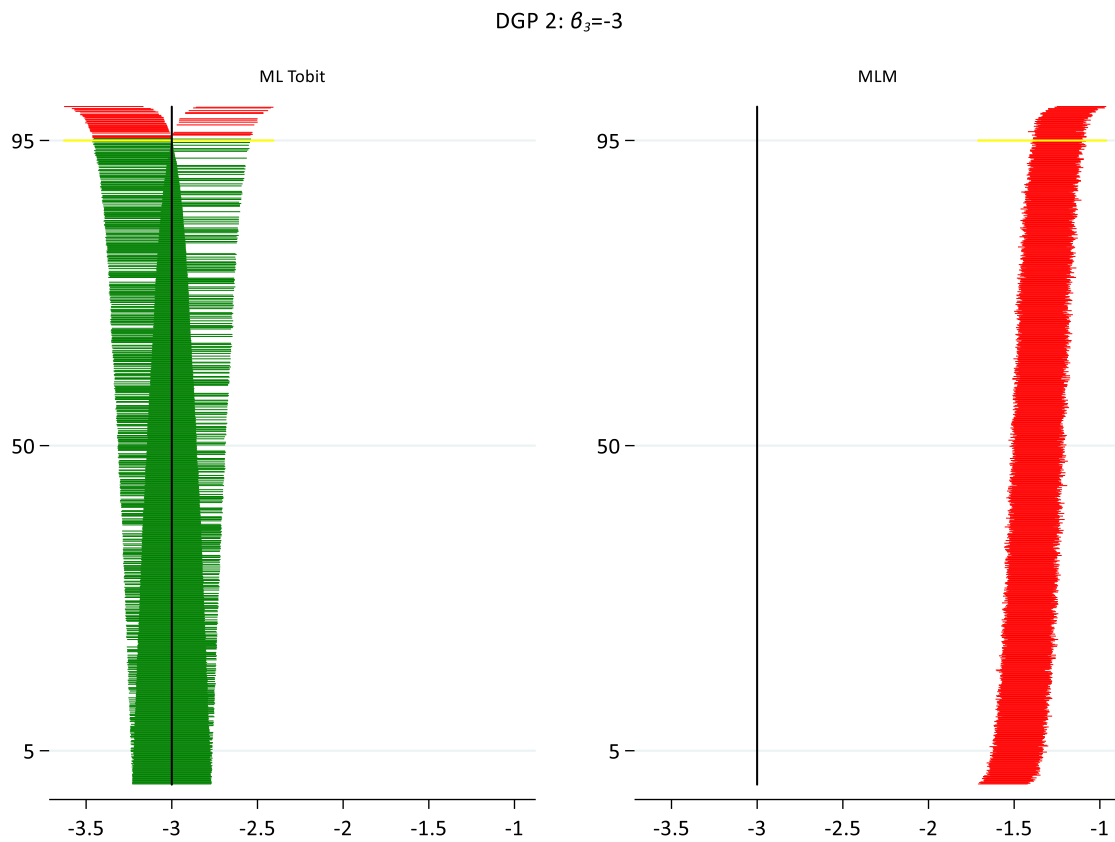

Supplementary Figure 8: "Zip Plot" of the 1000 95% Confidence intervals for each method of analysis for DGP 2. The vertical axis is the centile of the two-sided p-value against  $H_0 : \beta_3=3$  associated with the confidence interval for ML Tobit models with varying constraints of  $\sigma_\varepsilon^2$

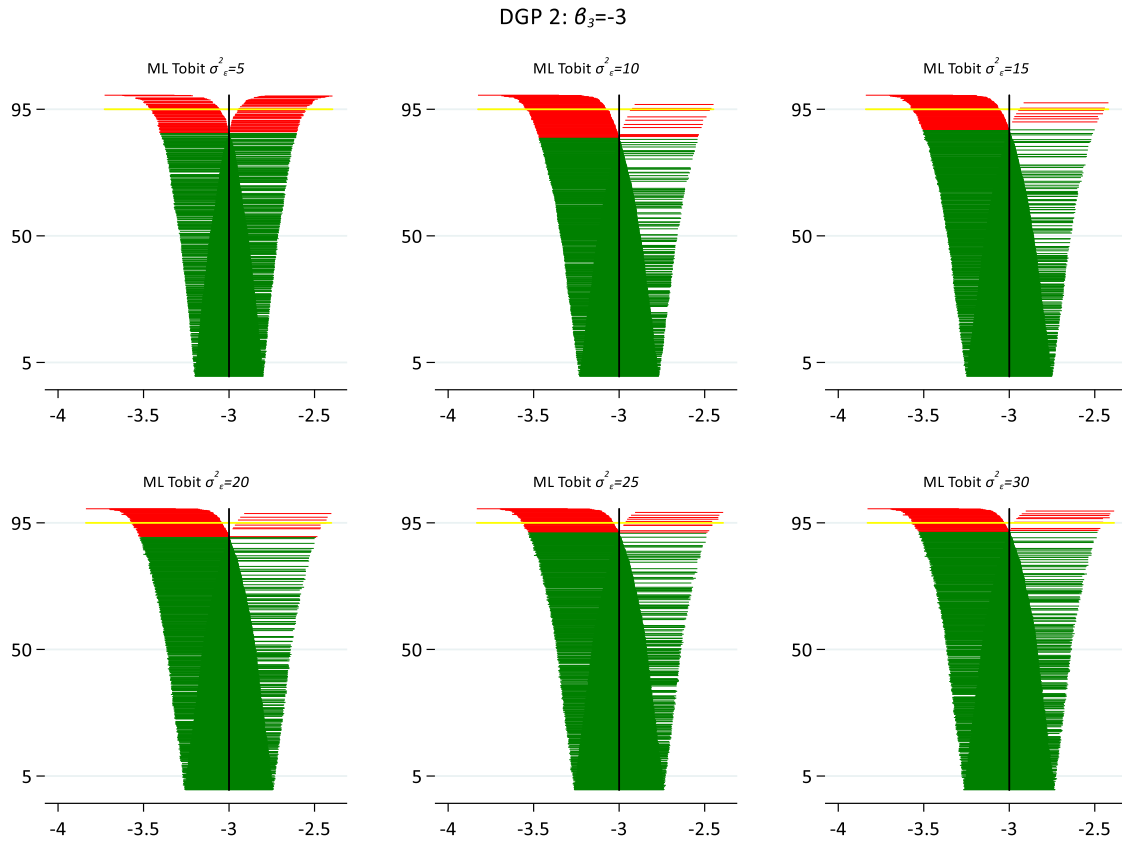

Supplementary Figure 9: “Zip Plot” of the 1000 95% Confidence intervals for each method of analysis for DGP 2. The vertical axis is the centile of the two-sided p-value against  $H_0 : \beta_3=3$  associated with the confidence interval for Single level OLS and Tobit models.

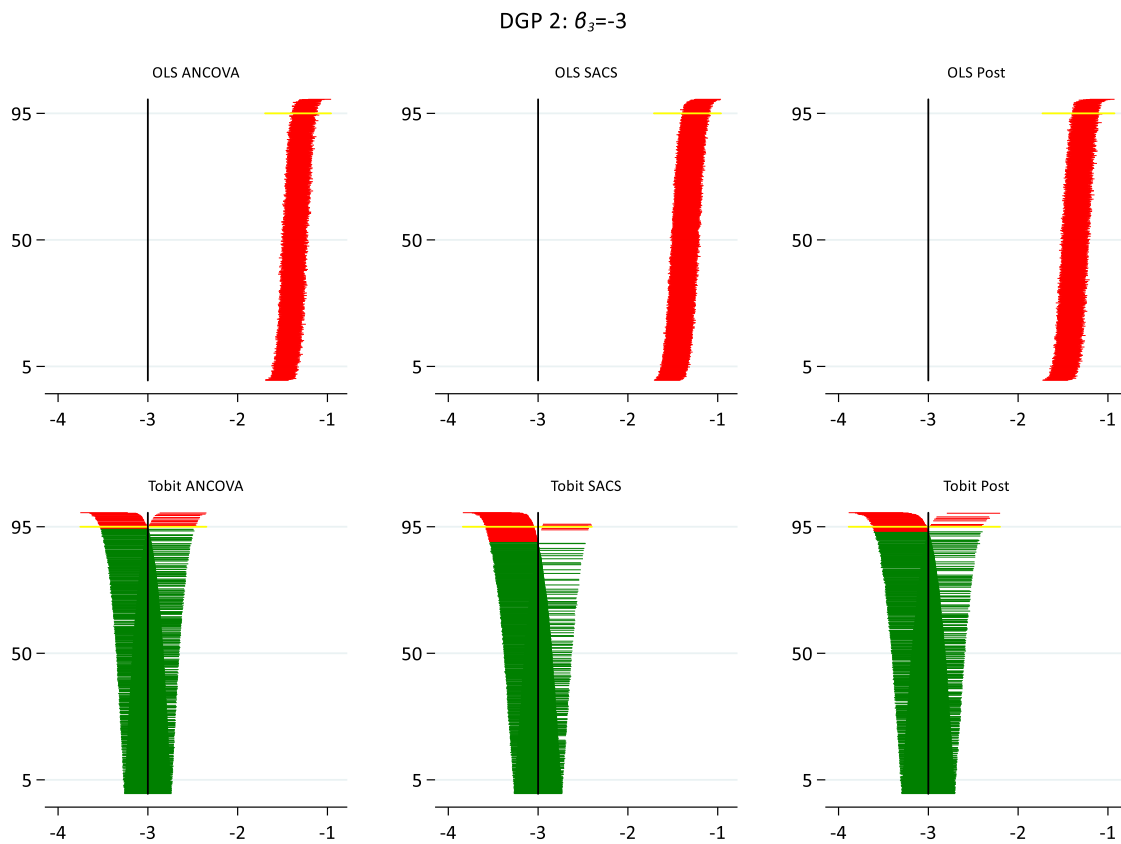

Supplementary Figure 10: "Zip Plot" of the 1000 95% Confidence intervals for each method of analysis for DGP 3. The vertical axis is the centile of the two-sided p-value against  $H_0 : \beta_3=3$  associated with the confidence interval for MLM and ML Tobit models.

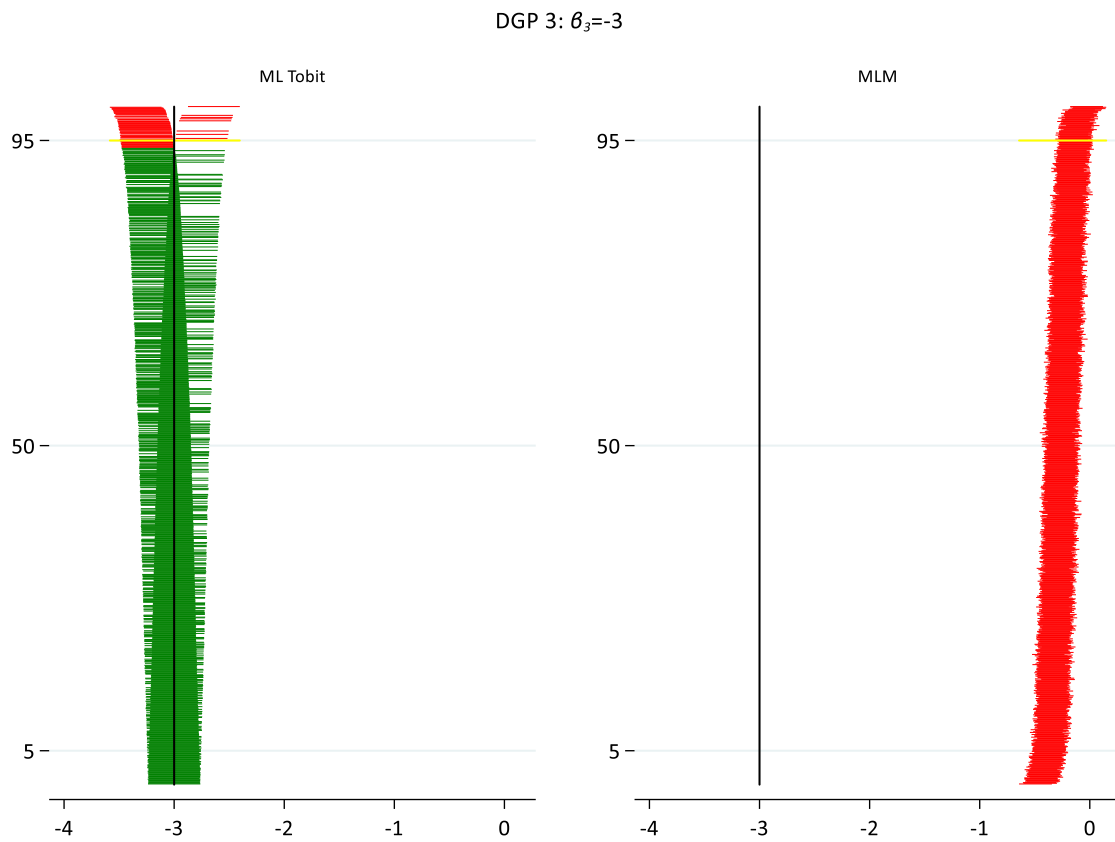

Supplementary Figure 11: “Zip Plot” of the 1000 95% Confidence intervals for each method of analysis for DGP 3. The vertical axis is the centile of the two-sided p-value against  $H_0 : \beta_3=3$  associated with the confidence interval for ML Tobit models with varying constraints of  $\sigma_\varepsilon^2$

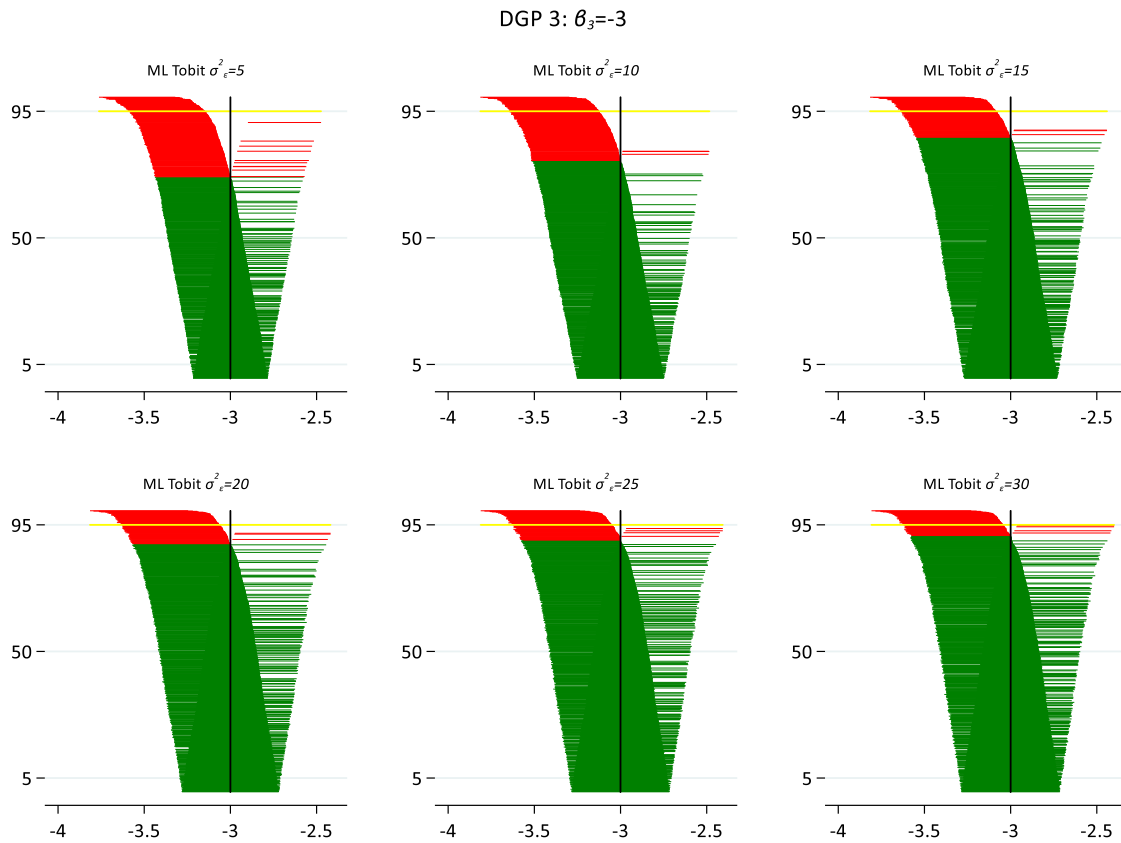

www only

Supplementary.Figure 12: “Zip Plot” of the 1000 95% Confidence intervals for each method of analysis for DGP 3. The vertical axis is the centile of the two-sided p-value against  $H_0 : \beta_3=3$  associated with the confidence interval for Single level OLS and Tobit models.

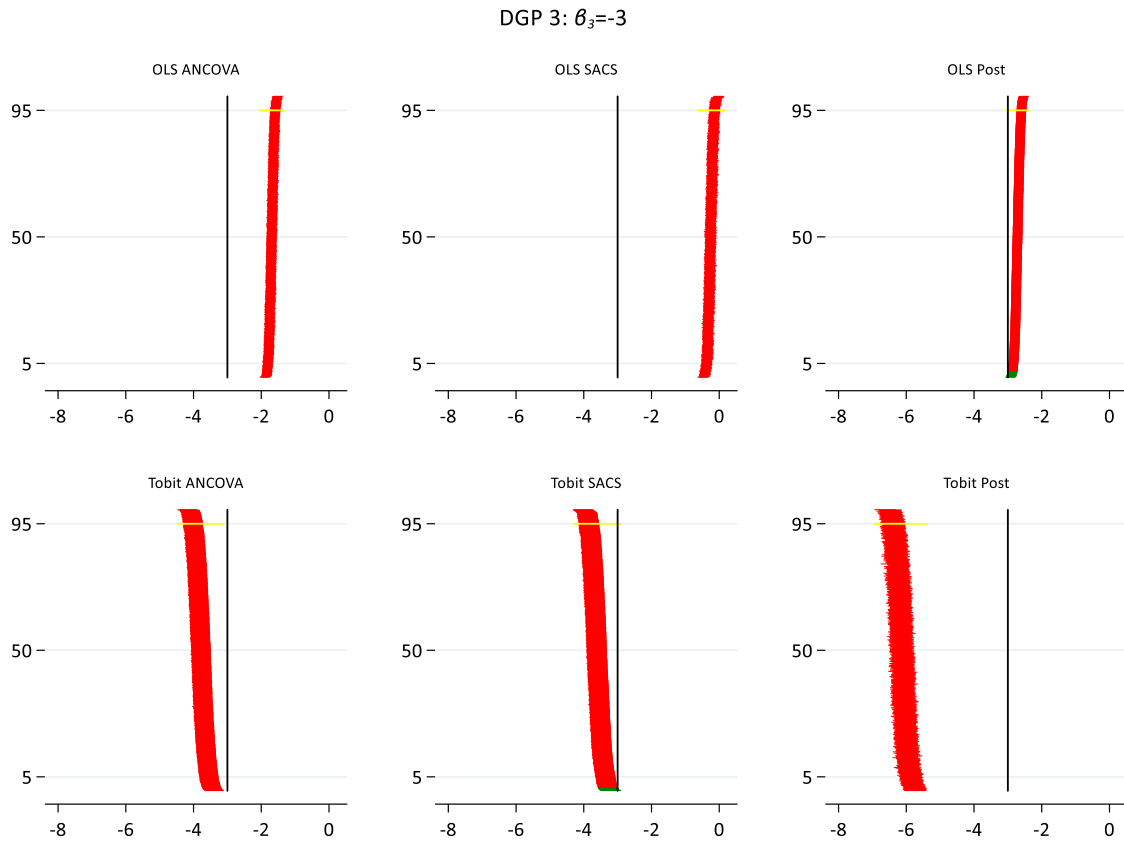

EW Only

Supplementary Figure 13: “Zip Plot” of the 1000 95% Confidence intervals for each method of analysis for DGP 4. The vertical axis is the centile of the two-sided p-value against  $H_0 : \beta_3=0$  associated with the confidence interval for MLM and ML Tobit models.

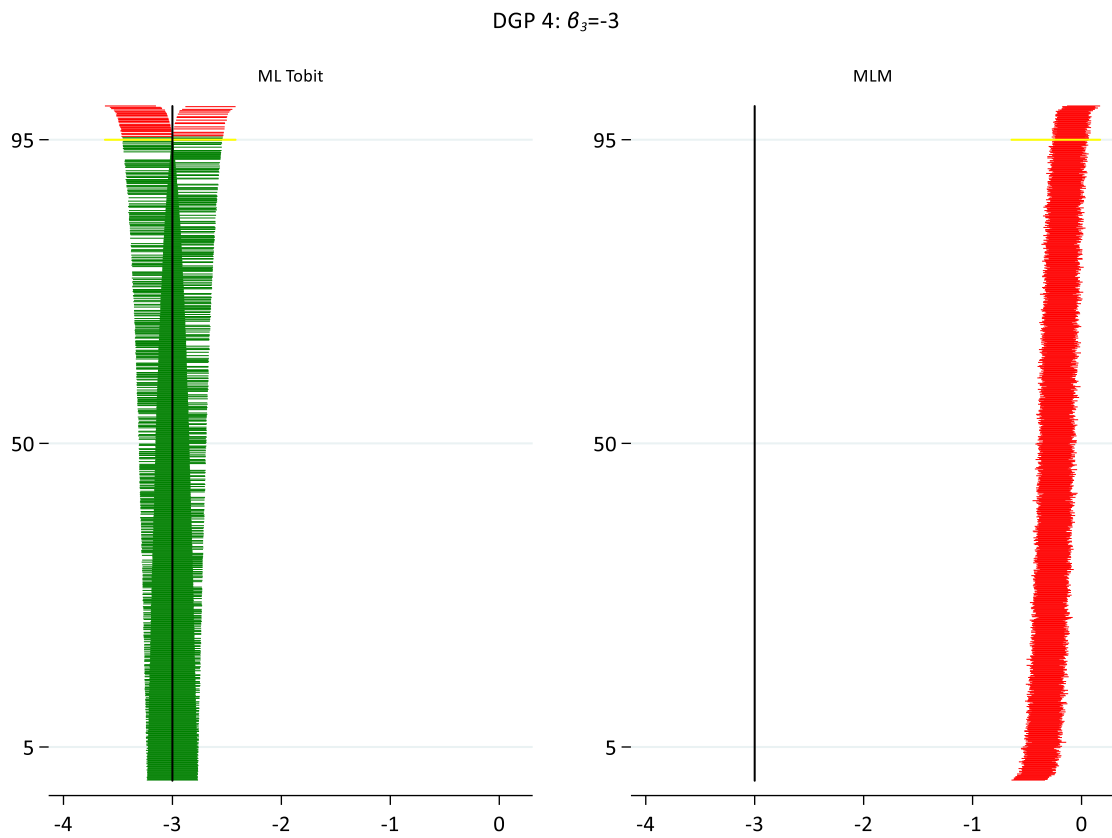

ew only



Supplementary Figure 14: "Zip Plot" of the 1000 95% Confidence intervals for each method of analysis for DGP 4. The vertical axis is the centile of the two-sided p-value against  $H_0 : \beta_3=0$  associated with the confidence interval for ML Tobit models with varying constraints of  $\sigma_\varepsilon^2$

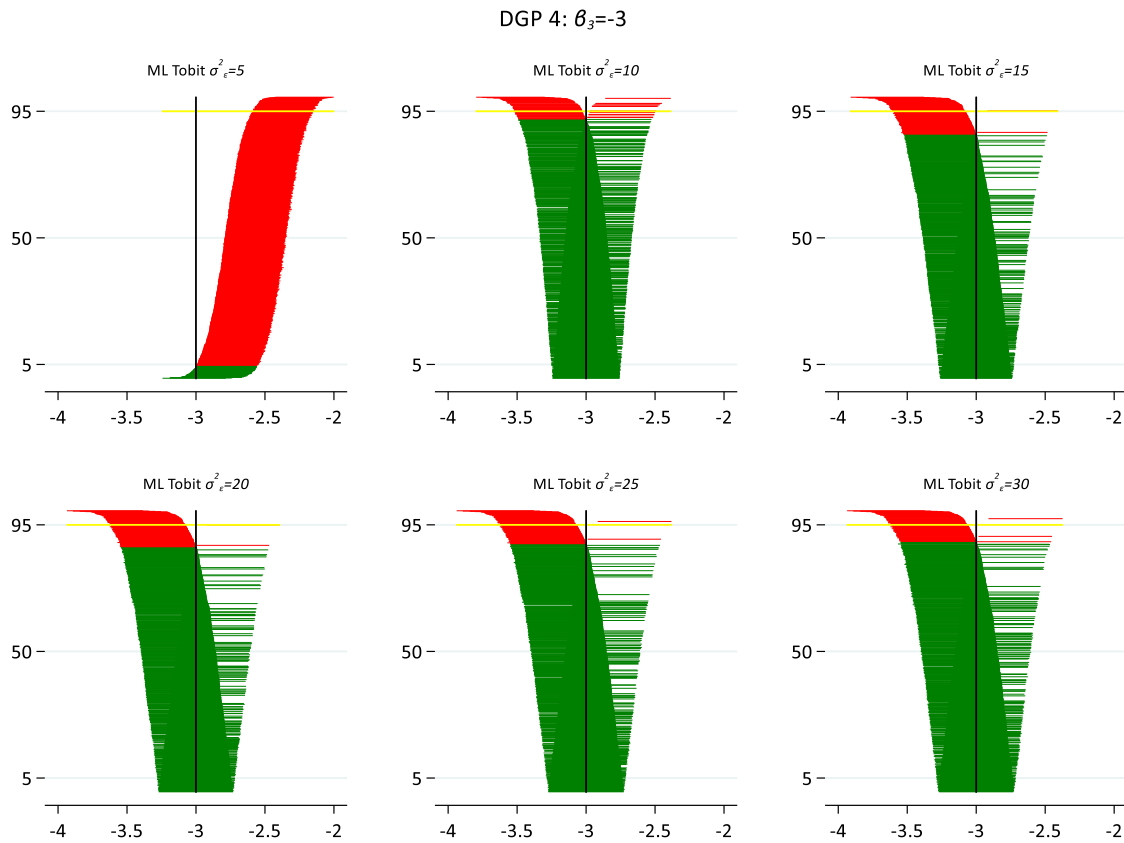

Supplementary.Figure 15: “Zip Plot” of the 1000 95% Confidence intervals for each method of analysis for DGP 4. The vertical axis is the centile of the two-sided p-value against  $H_0 : \beta_3=0$  associated with the confidence interval for Single-level OLS and Tobit models.

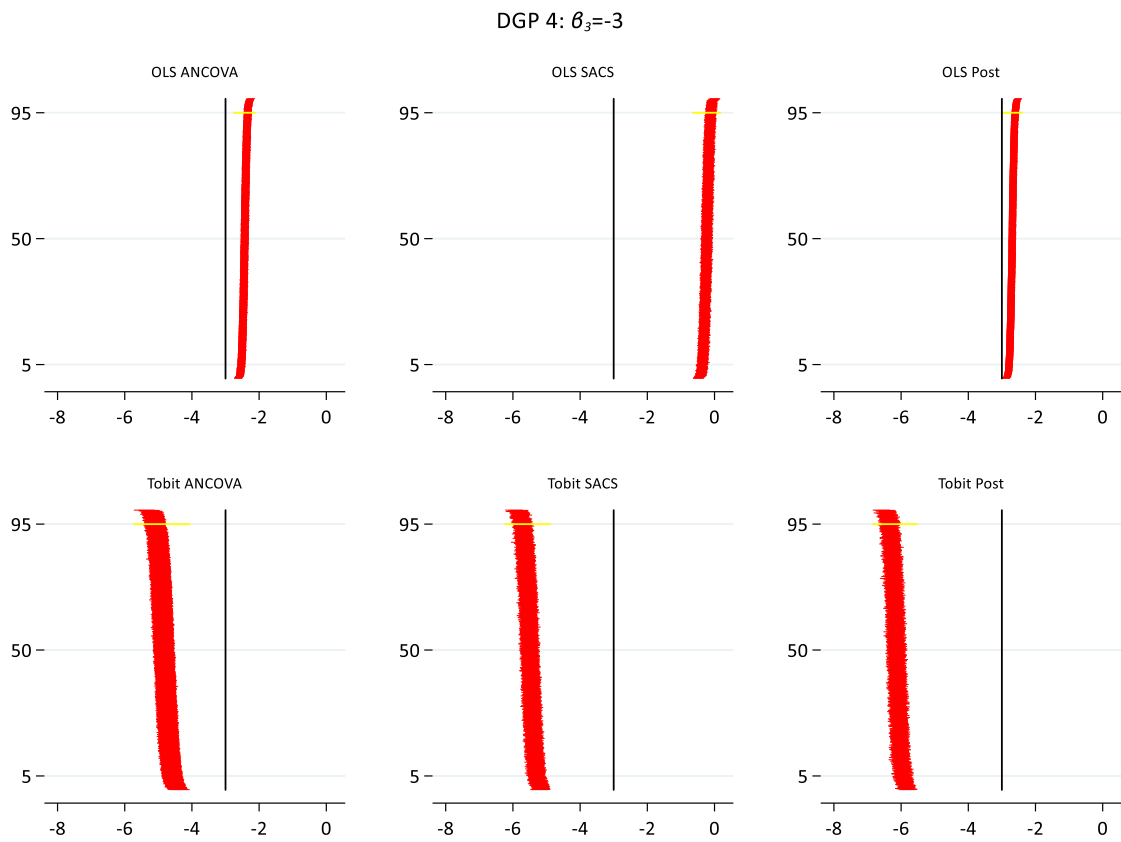

Peer Review Only

Supplementary Figure 16: Marginal effect of level 1 error variance ( $\sigma_{\epsilon}^2$ ) constraint on level 2 variance components

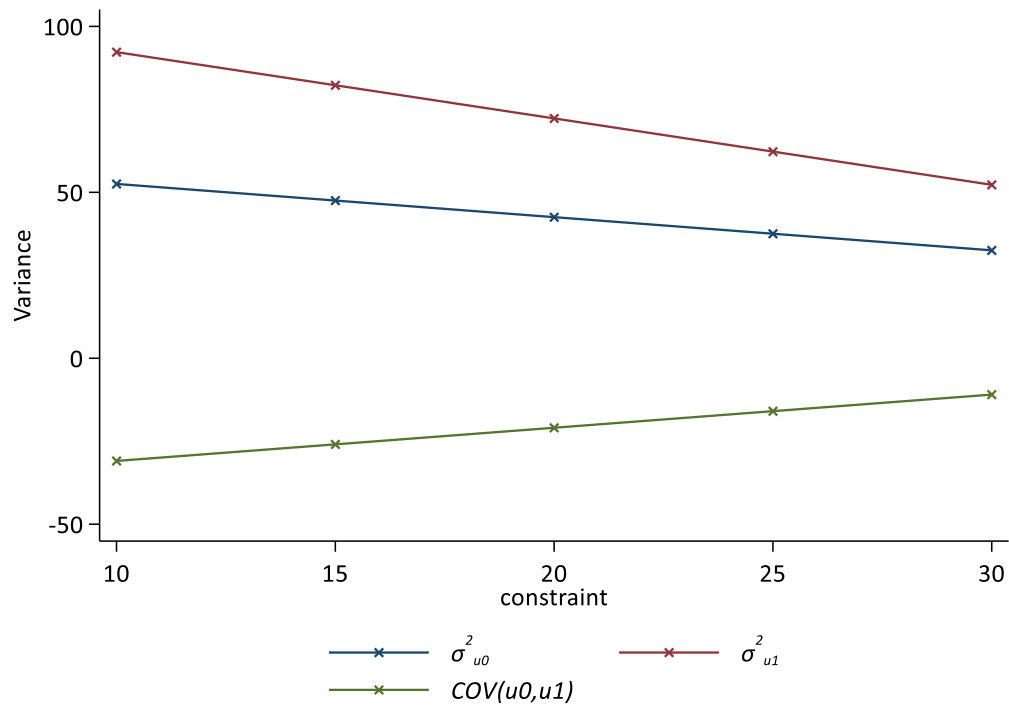

## Supplementary Tables

Supplementary Table 1: Simulation estimates of performance characteristics (Monte Carlo Standard Error in parentheses)

| Model                              | DGP 1: $\beta_3 = 0$               | DGP2 : $\beta_3 = -3$ | DGP 3: $\beta_3 = -3$ | DGP 4 : $\beta_3 = -3$ |                |                |
|------------------------------------|------------------------------------|-----------------------|-----------------------|------------------------|----------------|----------------|
| Empirical SE                       | MLM                                | 0.075 (0.0017)        | 0.072 (0.0016)        | 0.075 (0.0017)         | 0.079 (0.0018) |                |
|                                    | ML Tobit                           | 0.12 (0.0027)         | 0.12 (0.0026)         | 0.12 (0.0026)          | 0.12 (0.0026)  |                |
|                                    | ML Tobit $\sigma_\varepsilon^2=5$  | 0.14 (0.0031)         | 0.13 (0.0029)         | 0.14 (0.0032)          | 0.12 (0.0027)  |                |
|                                    | ML Tobit $\sigma_\varepsilon^2=10$ | 0.14 (0.0031)         | 0.13 (0.003)          | 0.14 (0.0032)          | 0.13 (0.0029)  |                |
|                                    | ML Tobit $\sigma_\varepsilon^2=15$ | 0.14 (0.0031)         | 0.13 (0.003)          | 0.14 (0.0032)          | 0.14 (0.003)   |                |
|                                    | ML Tobit $\sigma_\varepsilon^2=20$ | 0.14 (0.0031)         | 0.13 (0.003)          | 0.14 (0.0032)          | 0.14 (0.0031)  |                |
|                                    | ML Tobit $\sigma_\varepsilon^2=25$ | 0.14 (0.0031)         | 0.13 (0.003)          | 0.14 (0.0032)          | 0.14 (0.0031)  |                |
|                                    | ML Tobit $\sigma_\varepsilon^2=30$ | 0.14 (0.0031)         | 0.13 (0.003)          | 0.14 (0.0032)          | 0.14 (0.0031)  |                |
|                                    | OLS SACS                           | 0.075 (0.0017)        | 0.072 (0.0016)        | 0.075 (0.0017)         | 0.079 (0.0018) |                |
|                                    | OLS ANCOVA                         | 0.07 (0.0016)         | 0.064 (0.0014)        | 0.068 (0.0015)         | 0.059 (0.0013) |                |
|                                    | OLS Post                           | 0.072 (0.0016)        | 0.07 (0.0016)         | 0.071 (0.0016)         | 0.056 (0.0013) |                |
|                                    | Tobit SACS                         | 0.14 (0.0031)         | 0.13 (0.0029)         | 0.14 (0.0031)          | 0.15 (0.0034)  |                |
|                                    | Tobit ANCOVA                       | 0.14 (0.0032)         | 0.13 (0.003)          | 0.14 (0.0032)          | 0.13 (0.003)   |                |
|                                    | Tobit Post                         | 0.16 (0.0035)         | 0.15 (0.0034)         | 0.16 (0.0035)          | 0.13 (0.0028)  |                |
|                                    | Mean Square Error                  | MLM                   | 1.21 (0.0052)         | 2.69 (0.0075)          | 7.54 (0.013)   | 7.66 (0.014)   |
|                                    |                                    | ML Tobit              | 0.014 (0.0007)        | 0.014 (0.0006)         | 0.015 (0.0007) | 0.014 (0.0006) |
| ML Tobit $\sigma_\varepsilon^2=5$  |                                    | 0.036 (0.0015)        | 0.017 (0.0008)        | 0.038 (0.0015)         | 0.2 (0.0033)   |                |
| ML Tobit $\sigma_\varepsilon^2=10$ |                                    | 0.028 (0.0012)        | 0.025 (0.0011)        | 0.041 (0.0015)         | 0.019 (0.0009) |                |
| ML Tobit $\sigma_\varepsilon^2=15$ |                                    | 0.023 (0.001)         | 0.026 (0.0011)        | 0.035 (0.0013)         | 0.032 (0.0014) |                |
| ML Tobit $\sigma_\varepsilon^2=20$ |                                    | 0.021 (0.0009)        | 0.024 (0.001)         | 0.032 (0.0013)         | 0.033 (0.0014) |                |
| ML Tobit $\sigma_\varepsilon^2=25$ |                                    | 0.02 (0.0009)         | 0.023 (0.001)         | 0.03 (0.0012)          | 0.032 (0.0014) |                |
| ML Tobit $\sigma_\varepsilon^2=30$ |                                    | 0.02 (0.0009)         | 0.022 (0.001)         | 0.029 (0.0012)         | 0.031 (0.0014) |                |
| OLS SACS                           |                                    | 1.21 (0.0052)         | 2.69 (0.0075)         | 7.54 (0.013)           | 7.66 (0.014)   |                |
| OLS ANCOVA                         |                                    | 0.1 (0.0014)          | 2.68 (0.0066)         | 1.71 (0.0056)          | 0.33 (0.0021)  |                |
| OLS Post                           |                                    | 1.86 (0.0062)         | 2.68 (0.0073)         | 0.085 (0.0013)         | 0.097 (0.0011) |                |
| Tobit SACS                         |                                    | 0.54 (0.0064)         | 0.018 (0.0008)        | 0.63 (0.0069)          | 3.37 (0.018)   |                |
| Tobit ANCOVA                       |                                    | 0.27 (0.0046)         | 0.027 (0.0011)        | 0.39 (0.0056)          | 6.25 (0.021)   |                |
| Tobit Post                         |                                    | 9.42 (0.03)           | 0.027 (0.0012)        | 9.81 (0.031)           | 9.88 (0.025)   |                |
| Relative Error                     |                                    | MLM                   | -1.31 (2.21)          | 1.98 (2.28)            | 2.74 (2.3)     | -0.31 (2.23)   |
|                                    |                                    | ML Tobit              | -0.95 (2.22)          | 0.79 (2.25)            | 2.37 (2.29)    | 1.66 (2.27)    |
|                                    | ML Tobit $\sigma_\varepsilon^2=5$  | -28.5 (1.6)           | -22.8 (1.73)          | -23.8 (1.71)           | -7.01 (2.08)   |                |
|                                    | ML Tobit $\sigma_\varepsilon^2=10$ | -14.5 (1.91)          | -10.3 (2.01)          | -8.8 (2.04)            | -3.97 (2.15)   |                |
|                                    | ML Tobit $\sigma_\varepsilon^2=15$ | -7.35 (2.07)          | -3.54 (2.16)          | -2.41 (2.18)           | -2.46 (2.18)   |                |
|                                    | ML Tobit $\sigma_\varepsilon^2=20$ | -4.29 (2.14)          | -0.57 (2.22)          | 0.26 (2.24)            | -1.4 (2.21)    |                |
|                                    | ML Tobit $\sigma_\varepsilon^2=25$ | -3.04 (2.17)          | 0.65 (2.25)           | 1.35 (2.27)            | -0.8 (2.22)    |                |
|                                    | ML Tobit $\sigma_\varepsilon^2=30$ | -2.51 (2.18)          | 1.17 (2.26)           | 1.83 (2.28)            | -0.47 (2.23)   |                |
|                                    | OLS SACS                           | -1.3 (2.21)           | 1.99 (2.28)           | 2.75 (2.3)             | -0.3 (2.23)    |                |
|                                    | OLS ANCOVA                         | -0.5 (2.23)           | 1.51 (2.27)           | 6.84 (2.39)            | -0.54 (2.23)   |                |
|                                    | OLS Post                           | -1.96 (2.19)          | -0.086 (2.24)         | 1.46 (2.27)            | -1.25 (2.21)   |                |

|  |                                      |               |              |              |               |
|--|--------------------------------------|---------------|--------------|--------------|---------------|
|  | Tobit SACS                           | -2.97 (2.17)  | 2.09 (2.28)  | 2.82 (2.3)   | -0.056 (2.24) |
|  | Tobit ANCOVA                         | -0.19 (2.23)  | 2.21 (2.29)  | 4.01 (2.33)  | -1.35 (2.21)  |
|  | Tobit Post                           | -2.82 (2.17)  | 1.27 (2.27)  | 2.74 (2.3)   | 0.83 (2.26)   |
|  | MLM                                  | 247(14.1)     | 232.3 (13.9) | 275.4 (16.9) | 132.5 (6.66)  |
|  | ML Tobit                             | 37.8 (4.36)   | 28.3 (4.07)  | 50.5 (5.64)  | 6.08 (3.13)   |
|  | ML Tobit $\sigma_{\varepsilon}^2=5$  |               |              |              |               |
|  | ML Tobit $\sigma_{\varepsilon}^2=10$ | -0.034 (0.97) | -0.92 (1.07) | 3.91 (1.24)  | -13.3 (1.5)   |
|  | ML Tobit $\sigma_{\varepsilon}^2=15$ | 0.62 (1.22)   | -1.66 (1.37) | 3.24 (1.52)  | -22.5 (1.68)  |
|  | ML Tobit $\sigma_{\varepsilon}^2=20$ | 1.22 (1.3)    | -1.7 (1.44)  | 2.57 (1.6)   | -26 (1.7)     |
|  | ML Tobit $\sigma_{\varepsilon}^2=25$ | 1.67 (1.33)   | -1.52 (1.47) | 2.31 (1.62)  | -27.2 (1.7)   |
|  | ML Tobit $\sigma_{\varepsilon}^2=30$ | 1.99 (1.34)   | -1.34 (1.47) | 2.29 (1.63)  | -27.5 (1.69)  |
|  | OLS SACS                             | 247(14.1)     | 232.3 (13.9) | 275.4 (16.9) | 132.5 (6.66)  |
|  | OLS ANCOVA                           | 297.2(16)     | 327.4 (14.8) | 357.6 (20.9) | 310.3 (18.8)  |
|  | OLS Post                             | 281.7(15.5)   | 250 (14.8)   | 312.9 (19.2) | 360.1 (21.2)  |
|  | Tobit SACS                           | 2.26 (1.94)   | 1.8 (1.89)   | 7.48 (2.72)  | -38.6 (2.12)  |
|  | Tobit ANCOVA                         | -5.67 (3.07)  | -2.33 (1.55) | 1.52 (3.56)  | -19.1 (3.59)  |
|  | Tobit Post                           | -19.5 (2.6)   | -22.5 (2.6)  | -15.9 (2.95) | -10.6 (4.08)  |

# BMJ Open

**Analysis of change in patient reported outcome measures with floor and ceiling effects using the multi-level Tobit model: A simulation study and an example from a National Joint Register using body mass index and the Oxford Hip Score.**

|                                 |                                                                                                                                                                                                                                                                                                                                                                                                                                                                                                                                          |
|---------------------------------|------------------------------------------------------------------------------------------------------------------------------------------------------------------------------------------------------------------------------------------------------------------------------------------------------------------------------------------------------------------------------------------------------------------------------------------------------------------------------------------------------------------------------------------|
| Journal:                        | <i>BMJ Open</i>                                                                                                                                                                                                                                                                                                                                                                                                                                                                                                                          |
| Manuscript ID                   | bmjopen-2019-033646.R1                                                                                                                                                                                                                                                                                                                                                                                                                                                                                                                   |
| Article Type:                   | Original research                                                                                                                                                                                                                                                                                                                                                                                                                                                                                                                        |
| Date Submitted by the Author:   | 22-Jun-2020                                                                                                                                                                                                                                                                                                                                                                                                                                                                                                                              |
| Complete List of Authors:       | Sayers, Adrian; University of Bristol, Musculoskeletal Research Unit Whitehouse, Michael; University of Bristol, Musculoskeletal Research Unit Judge, Andrew; University of Bristol, Musculoskeletal Research Unit, Translational Health Sciences, Bristol Medical School, University of Bristol, Learning and Research Building, Level 1, Southmead Hospital, Southmead, BS10 5NB<br>MacGregor, Alex; University of East Anglia, Norwich Medical School<br>Blom, AW; University of Bristol,<br>Ben-Shlomo, Yoav; University of Bristol, |
| <b>Primary Subject Heading</b>: | Epidemiology                                                                                                                                                                                                                                                                                                                                                                                                                                                                                                                             |
| Secondary Subject Heading:      | Patient-centred medicine, Rheumatology                                                                                                                                                                                                                                                                                                                                                                                                                                                                                                   |
| Keywords:                       | Multi-level Tobit Model, Change Scores, Epidemiologic Methods, Arthroplasty, Patient Reported Outcome Measures, Longitudinal Studies                                                                                                                                                                                                                                                                                                                                                                                                     |
|                                 |                                                                                                                                                                                                                                                                                                                                                                                                                                                                                                                                          |

SCHOLARONE™  
Manuscripts



I, the Submitting Author has the right to grant and does grant on behalf of all authors of the Work (as defined in the below author licence), an exclusive licence and/or a non-exclusive licence for contributions from authors who are: i) UK Crown employees; ii) where BMJ has agreed a CC-BY licence shall apply, and/or iii) in accordance with the terms applicable for US Federal Government officers or employees acting as part of their official duties; on a worldwide, perpetual, irrevocable, royalty-free basis to BMJ Publishing Group Ltd ("BMJ") its licensees and where the relevant Journal is co-owned by BMJ to the co-owners of the Journal, to publish the Work in this journal and any other BMJ products and to exploit all rights, as set out in our [licence](#).

The Submitting Author accepts and understands that any supply made under these terms is made by BMJ to the Submitting Author unless you are acting as an employee on behalf of your employer or a postgraduate student of an affiliated institution which is paying any applicable article publishing charge ("APC") for Open Access articles. Where the Submitting Author wishes to make the Work available on an Open Access basis (and intends to pay the relevant APC), the terms of reuse of such Open Access shall be governed by a Creative Commons licence – details of these licences and which [Creative Commons](#) licence will apply to this Work are set out in our licence referred to above.

Other than as permitted in any relevant BMJ Author's Self Archiving Policies, I confirm this Work has not been accepted for publication elsewhere, is not being considered for publication elsewhere and does not duplicate material already published. I confirm all authors consent to publication of this Work and authorise the granting of this licence.

1  
2  
3 Analysis of change in patient reported outcome measures with floor and ceiling effects using the  
4 multi-level Tobit model: A simulation study and an example from a National Joint Register using  
5 body mass index and the Oxford Hip Score.  
6  
7

8 Adrian Sayers<sup>a,b</sup>, Michael R Whitehouse<sup>a,c</sup>, Andrew Judge<sup>a,c</sup>, Alexander J Macgregor<sup>d</sup>, Ashley W  
9 Blom<sup>a,c</sup>, Yoav Ben-Shlomo<sup>b</sup>.  
10  
11

12 Author affiliations:  
13

- 14 a) Musculoskeletal Research Unit, Bristol Medical School, 1st Floor Learning & Research  
15 Building, Southmead Hospital, Bristol, BS10 5NB, United Kingdom  
16  
17 b) Population Health Sciences, Bristol Medical School, Canynge Hall, 39 Whatley Road Bristol,  
18 BS8 2PS, United Kingdom  
19  
20 c) National Institute for Health Research Bristol Biomedical Research Centre, University of  
21 Bristol  
22  
23 d) Norwich Medical School, University of East Anglia, Norwich, United Kingdom  
24  
25

26 Running head : Analysis of change with multi-level Tobit models  
27

28 Conflict of Interest: The authors have no conflict of interests  
29

30 Financial Support  
31

32 AS is funded by an MRC Strategic Skills Fellowship MR/L01226X/1  
33  
34

35 This study was supported by the NIHR Biomedical Research Centre at University Hospitals Bristol  
36 NHS Foundation Trust and the University of Bristol. The views expressed in this publication are those  
37 of the author(s) and not necessarily those of the NHS, the National Institute for Health Research or the  
38 Department of Health and Social Care.  
39  
40  
41  
42  
43

44 Corresponding Author: Adrian Sayers  
45

46 email address for correspondence, [adrian.sayers@bristol.ac.uk](mailto:adrian.sayers@bristol.ac.uk)  
47  
48  
49  
50  
51  
52  
53  
54  
55  
56  
57  
58  
59  
60



## **Abstract (290 Words)**

### **Objectives**

This study has three objectives. 1) Investigate the association between body mass index (BMI) and the efficacy of primary hip replacement using a Patient Reported Outcome Measure (PROMs) with a measurement floor and ceiling. 2) Explore the performance of different estimation methods to estimate change in PROMs score following surgery using a simulation study and real word data where data has measurement floors and ceilings. 3) Lastly, develop guidance for practicing researchers on the analysis of PROMs in the presence of floor and ceiling effects.

### **Design**

Simulation study and prospective national medical device register

### **Setting**

National register of joint replacement and medical devices

### **Methods**

Using a Monte-Carlo simulation study and data from a national joint replacement register (162,513 patients with pre/post surgery PROMs) we investigate simple approaches for the analysis of outcomes with floor and ceiling effects that are measured at two occasions: linear and Tobit regression (baseline adjusted ANCOVA, change-score analysis, post-score analysis) in addition to linear and multi-level Tobit models.

### **Primary outcome**

The primary outcome of interest is change in patient reported outcome measures from pre-surgery to 6 months post-surgery.

### **Results**

Analysis of data with floor and ceiling effects with models that fail to account for these features induce substantial bias. Single level Tobit models only correct for floor or ceiling effects when the exposure of interest is not associated with the baseline score. In observational data scenarios, only multi-level Tobit models are capable of providing unbiased inferences.

### **Conclusions**

Inferences from pre/post studies that fail to account for floor and ceiling effects may induce spurious associations with substantial risk of bias. Multi-level Tobit models indicate the efficacy of total hip replacement is independent of BMI. Restricting access to total hip replacement based on a patients BMI can not be supported by the data.

## **Strengths and limitations of this study**

- We use a comprehensive simulation study and large prospective study set to investigate the effect of floor and ceiling effects in the analysis of change in patient reported outcome measure pre- and post- surgery.
- We demonstrate the use and performance of multi-level Tobit models to estimate change in patient reported outcome measures with floor and ceiling effects and compare them to simple analytical approaches.
- We compare and demonstrate a variety of estimators in simulation under a variety of different data generating mechanisms and compare results to real world data.
- This is the largest and most comprehensive analysis of the effect of BMI on the efficiency of total hip replacement and provides data which will influence the provision of hip replacement.

## **Keywords**

Multi-level Tobit Model, Change Scores, Epidemiologic Methods, Arthroplasty, Patient Reported Outcome Measures, Longitudinal Studies

## **Introduction**

In many non-randomised experiments, researchers are interested in assessing how change in health status is associated with a covariate of interest. Whilst there is much guidance available on assessing change in randomised experiments, and extensive discussion with respect to efficiency and bias<sup>1-9</sup>, the guidance in non-randomised studies is less clear. The principle difference is that in observational studies we do not expect balance between different levels of an exposure at baseline, in addition to expecting imbalance in other confounding factors. Glymour et al. advocate the use of, simple analysis of, change scores (SACS) without baseline adjustment to achieve unbiased causal effect estimates using causal arguments presented through Directed Acyclic Graphs (DAGS)<sup>10</sup>. They briefly suggest that in settings with floor and/or ceiling effects, that standard change analyses with and without baseline adjustment are both biased, and non-standard analyses based on Tobit models (censored regression) may ameliorate floor and ceiling problems. The degree to which Tobit models ameliorate the problems caused by floor and ceiling effects is unclear. Some authors suggest that using percentage change is one strategy to avoid dealing with floor and ceiling effects, but Twisk highlighted that this simply represents a linear transformation of change<sup>11</sup>, and therefore does not deal with the problem of floor and ceiling effects. Twisk also describes the use of a longitudinal (multi-level) Tobit regression model to appropriately account for floor and ceiling effects in studies with repeated measures<sup>12</sup>. However, since its publication in 2009 there have only been a handful of analyses that use multi-level Tobit models<sup>13-16</sup>, suggesting that lack of familiarity with these methods or understanding of when they can and should be applied has deterred analysts in their use, or when they can be applied.

Multi-level Tobit models are now incorporated in mainstream statistical software packages, such as Stata. Given their accessibility, they could arguably be used more frequently than they are. This is relevant considering that the use of measurement instruments with floor and ceiling effects are omnipresent in health related research. Examples include outcomes in health related quality of life (e.g. EQ5D, SF-36, SF-12), psychological wellbeing (e.g. Hospital Anxiety and Depression Scale (HADS), Edinburgh Postnatal Depression Scale (EPDS)), and disease specific measures of wellbeing (e.g. Western Ontario and McMaster Universities Osteoarthritis Index (WOMAC) and Oxford Hip Score (OHS) as used in patients with osteoarthritis). Despite this, there is very little guidance available with respect to the consequences of using measurement instruments with floor or ceiling effects, when attempting to make inferences about the effect of an exposure on the change (between two time points) of an outcome of interest.

In this paper we use a Monte-Carlo simulation study to compare the performance of multi-level linear and Tobit models, Ordinarily Least Squares (OLS) regression and single-level Tobit regression, with and without adjustment for baseline scores, in the analysis of change in three different non-

1  
2  
3 randomised experiments, and a randomised experiment. We also demonstrate the use of these models  
4 using real world data from a large national joint replacement register.  
5  
6

7 We motivate the simulation and exemplar data analysis using an example from joint replacement  
8 research describing the association between body mass index (BMI) and the change in a disease  
9 specific patient reported outcome measure (PROM), the Oxford Hip Score (OHS). The issue is  
10 contentious in the UK <sup>17-19</sup> and USA <sup>20</sup> as some organisations suggest restricting joint-replacement to  
11 patients based on their BMI, citing an increased risk of revision surgery and lack of efficacy of  
12 surgery. The small increase in absolute risk of revision in obese patients, must be balanced against the  
13 other benefits of joint replacement, including a reduction in pain and improved physical functioning.  
14 Therefore, it is of interest to clinicians, policy makers, and patients to know the relative effect of  
15 obesity on the efficacy of total hip replacement compared to “normal weight patients”.  
16  
17  
18  
19  
20  
21  
22  
23  
24  
25  
26  
27  
28  
29  
30  
31  
32  
33  
34  
35  
36  
37  
38  
39  
40  
41  
42  
43  
44  
45  
46  
47  
48  
49  
50  
51  
52  
53  
54  
55  
56  
57  
58  
59  
60

## Methods

### Simulation Study Aims

We investigated the performance of four different methods of analysis, when estimating the effect of an exposure (BMI) on change in response (PROM) before and after total hip replacement with floor and ceiling effects using the Aims, Data Generating Process (DGP), Methods, Estimand, Performance (ADMEP) approach recommended by Morris et al. [21].

### Data Generating Process (DGP)

We simulated longitudinal data of “well-being” before and after surgery. We assume that “well-being” is a latent, truly continuous and stable construct which is measured imperfectly by the OHS. Measurement error and floor/ceiling effects are then added to the latent construct to illustrate their consequences.

We assume the response, well-being, is a latent construct ( $y_{ij}^*$ ) measured at the  $i^{\text{th}}$  occasion, where  $i$  varies from 0 (pre-surgery) to 1 (1 year post-surgery), for the  $j^{\text{th}}$  individual is modelled as a linear function of time.  $x_{0j}$  is mean-centred BMI categories according to WHO criteria i.e. -2 = BMI < 18.5 (under weight), -1 = 18.5 < BMI ≤ 25 (normal), 0 = 25 < BMI ≤ 30 (overweight), 1 = 30 < BMI ≤ 35 (obese), and 2 = BMI > 35 (morbidly obese), i.e.  $x_{0j} = 0$  is a patient with a BMI classed as overweight.

$$y_{ij}^* = \beta_0 + u_{0j} + (\beta_1 + u_{1j})t_{ij} + \beta_2 x_{0j} + \beta_3 x_{0j} t_{ij}$$

$$\begin{bmatrix} u_{0j} \\ u_{1j} \end{bmatrix} \sim N(0, \Omega_u), \quad \Omega_u = \begin{bmatrix} \sigma_{u0}^2 & \\ \sigma_{u01} & \sigma_{u1}^2 \end{bmatrix} \quad 1$$

where  $t_{ij}$  is the time at which measurement  $i$  was taken on individual  $j$ , coded as 0 at pre-surgery and 1 post-surgery.  $\beta_0$  is the baseline population average response for a patient with average BMI, and  $u_{0j}$  represents the  $j^{\text{th}}$  individual difference from the baseline response. The sum of  $\beta_0 + u_{0j}$  is the individual baseline response for a patient with average BMI.  $\beta_1$  represents the population average change per unit increase in time for a patient with average BMI, and  $u_{1j}$  represents the  $j^{\text{th}}$  individual difference from the population average change per unit increase in time. The sum  $\beta_1 + u_{1j}$  is the individual average change per unit increase in time for a patient with average BMI.  $\beta_2$  represents the effect of a 1-unit increase in the exposure ( $x_{0j}$ ) of interest (BMI) pre-surgery and  $\beta_3$  represents the effect of a 1-unit increase in BMI ( $x_{0j}$ ) on the pre-post surgery change in well-being ( $y_{ij}^*$ ). The variance in individual deviations from the population average response at baseline and the average rate of change are  $\sigma_{u0}^2$  and  $\sigma_{u1}^2$  respectively. The covariance between baseline measurements and rate of change is characterised by  $\sigma_{u01}$  (with correlation  $\rho_{u01}$ ).

Under the assumption of linear change, data was simulated from a multi-level model with a random intercept and slope, see Figure 1 for an illustration of a patient trajectory with an average BMI.

<Figure 1 Here>

The observed response without floor and ceiling effects ( $y_{ij}$ ) is simulated by adding measurement error in the linear trajectory,  $\varepsilon_{ij}$ , to the latent response, where  $\varepsilon_{ij} \sim N(0, \sigma_\varepsilon^2)$ .

$$y_{ij} = y_{ij}^* + \varepsilon_{ij} \quad 2$$

A response with floor and ceiling effects  $y_{ij}^{FC}$  is simulated by restricting the response to lie between 0 and 48.

$$y_{ij}^{FC} = \begin{cases} 0 & \text{if } y_{ij} \leq 0 \\ y_{ij} & \text{if } 0 < y_{ij} < 48 \\ 48 & \text{if } y_{ij} \geq 48 \end{cases} \quad 3$$

See Figure 2 for a graphical illustration of the trajectory generation: we first simulate  $y_{ij}^*$ , then add some measurement error ( $\varepsilon_{ij}$ ) to yield an observed response ( $y_{ij}$ ), and finally add floor and ceiling effects to obtain the observed truncated response ( $y_{ij}^{FC}$ ).

<Figure 2 Here>

We compared 4 DGPs to illustrate a range of scenarios by manipulating  $\beta_2$ ,  $\beta_3$ , and  $\rho_{u01}(\sigma_{u01})$  to influence the association between pre- and post-surgery outcomes.  $\beta_0$ ,  $\beta_1$ ,  $\sigma_{u0}$ ,  $\sigma_{u1}$ , and  $\sigma_{\varepsilon_{ij}}$  were fixed at 10, 40, 10, 15 and 3 respectively. **DGP 1** is a null model, where there is a baseline effect of the exposure is  $\beta_2 = -3$ , but the exposure did not influence change over time ( $\beta_3 = 0$ ), and there is no correlation between baseline values and subsequent change ( $\rho_{u01} = 0$ ).

**DGP 2** replicates a simple randomised trial where there is no difference between levels of the exposure at baseline ( $\beta_2 = 0$ ), but the exposure did influence change over time ( $\beta_3 = -3$ ), and there is no correlation between baseline values and subsequent change ( $\rho_{u01} = 0$ ). **DGP 3** and **DGP 4** replicate a cohort study, where there is a difference between levels of the exposure at baseline ( $\beta_2 = -3$ ), and the exposure also influenced change over time ( $\beta_3 = -3$ ). **DGP 3** specified no correlation between baseline values and subsequent change ( $\rho_{u01} = 0$ ), whereas **DGP 4** specified a negative correlation between baseline values and change ( $\rho_{u01} = -0.5$ ), reflecting the fact the joint-replacement surgery has the tendency to normalise an individual's well-being, see Figure 3 for an illustration of the associated trajectories.

<Figure 3 Here>

We conducted a Monte-Carlo simulation with 1000 replicated datasets, each with 10,000 patients. A balanced dataset, i.e. 3 data points for each individual, was simulated to ensure identification of the

linear and Tobit multi-level models occurred, i.e. two data points allows estimation of baseline and change parameters but not measurement error. The middle data point was then dropped to replicate a pre/post design.

### Method of analysis

For data sets with 3 measurement occasions, a linear multi-level model and a multi-level Tobit model (MLTM) that reflects the data generating process were fitted to the data, see equation 1.

In datasets with 2 measurement occasions, i.e. a pre-post design, single-level OLS and Tobit models were fitted to the data. Tobit models were only used when floor and ceiling effects had been simulated. Three different models were explored:

1) A simple model for post surgery well-being.

$$y_{1j}^{FC} = \alpha_1 + \alpha_2 x_{0j} + \varepsilon_j \quad 4$$

2) A Simple Analysis of Change Score (SACS).

$$(y_{1j}^{FC} - y_{0j}^{FC}) = \alpha_6 + \alpha_7 x_{0j} + \varepsilon_j \quad 5$$

3) A model for change adjusted for baseline i.e. baseline adjusted ANCOVA. This model is equivalent to a model for the post score adjusted for baseline ANCOVA, with the exception of the interpretation of the intercept.

$$(y_{1j}^{FC} - y_{0j}^{FC}) = \alpha_8 + \alpha_9 x_{0j} + \alpha_{10} y_{0j}^{FC} + \varepsilon_j \quad 6$$

In addition, an under-identified MLTM model, equivalent to equation 1 with constrained error variance  $\sigma_\varepsilon^2$  was fitted in the spirit of a sensitivity analysis, where  $\sigma_\varepsilon^2$  was constrained to a value from 5, 10, 15, 20, 25 and 30.

### Estimand

The estimand of interest is the population average effect of the interaction between the exposure and change in slope i.e.  $\beta_3$  the pre-post surgery change in well-being. We test whether the exposure modifies the improvement post-surgery (i.e. the null hypothesis that  $\beta_3 = 0$ ).

### Performance

The performance of each method was explored in terms of bias, coverage, empirical standard error, model based standard error, mean square error, relative error and relative precision.

**National Joint Registry of England, Wales, Northern Ireland, and the Isle of Man (NJR)**

1  
2  
3 Using data from the NJR, we investigated the association between BMI and a patient reported  
4 outcome measure, the OHS, in patients undergoing elective total hip replacement (THR) between 1<sup>st</sup>  
5 April 2003 and 22<sup>nd</sup> February 2017.  
6  
7

### 8 **Data source**

9  
10 The NJR commenced data collection in April 2003; at inception it was mandatory for all THRs  
11 conducted in the private sector to be entered into the NJR, and from 2011 all THR procedures in the  
12 public and private sector were required to be entered into the NJR. A recent national audit of data  
13 entered into the NJR between 2014 and 2015 estimated data capture of 95% for primary THR and  
14 91% for revision THR.  
15  
16  
17  
18

### 19 **Inclusion/exclusion criteria**

20  
21 All consenting patients undergoing THR were eligible to be included in the analysis. Patients were  
22 included if their patient history was unique and consistent, i.e. contained no duplicates, revision prior  
23 to primary, or currently held in query by the submitting unit. Due to the requirement for reliable date  
24 information, patients who were indicated to have died prior to undergoing a procedure, were more  
25 than 110 years of age, had undergone a procedure prior to their date of birth, or received a procedure  
26 prior to 2003 were excluded from the analysis. Only primary THRs, where the primary indication for  
27 operation was osteoarthritis (OA) with unique prosthesis combinations were included in the analysis.  
28 All THRs with metal-on-metal bearing combinations were excluded from the analysis due to the  
29 exceptionally high failure rate in this group[22, 23]. Patients who were less than 50 years of age at the  
30 date of the index THR were also excluded, due to the high likelihood that these cases are due to OA  
31 secondary to other pathology.  
32  
33  
34  
35  
36  
37  
38

39 See Supplementary.Figure 1 for a detailed breakdown of inclusion criteria.  
40

### 41 **Primary exposure**

42  
43 The primary exposure of interest in this study is BMI. BMI was introduced into the second “Minimal  
44 Data Set” in 2004. Patients with BMI between 10 and 60 were included in the analysis. BMI measures  
45 were excluded as implausible if height and weight measures were less than 130cm and weight less  
46 than 30kg respectively. See Supplementary.Figure 2.  
47  
48  
49

### 50 **Primary outcome**

51  
52 The primary outcome of interest in this study is change in OHS after surgery. Linked National  
53 PROMs were first available in 2009, see Supplementary.Figure 3 for details of linkage.  
54  
55

### 56 **Confounding factors**

57  
58 Pre-operative confounding factors were thematically organised into groups: 1) Patient factors included  
59 sex, American Society of Anesthesiologists (ASA) grade, and operation funder. 2) Operation factors  
60



1  
2  
3 included fixation, approach, patient position during surgery, anaesthetic type, thromboprophylaxis  
4 regime, bearing, and year of primary THR. 3) The setting of the treatment episode (i.e. private or  
5 NHS hospital). 4) Consultant based factors included the training status of the primary surgeon  
6 performing the operation. 5) Deprivation factors were based on the English indices of multiple  
7 deprivation (an area based index of deprivation).  
8  
9  
10

### 11 **Statistical analyses**

12 Means, standard deviations and interquartile points were used to describe continuous variables.  
13 Frequencies and percentages were used to describe categorical variables.  
14  
15  
16

17 The association between change in PROMS score was investigated using the same single-level  
18 methods and the ML Tobit model with constrained error variances described in the simulation study  
19 as an exemplar. In addition, we conducted more comprehensive analyses using restricted cubic splines  
20 to model the BMI association in the ML Tobit model with constrained error variance, single-level  
21 linear and Tobit SACS, ANCOVA, and Post score models. In the ML Tobit model, BMI was  
22 modelled with restricted cubic splines at baseline and its interaction with time. Correspondingly, we  
23 adjusted OHS for patient and deprivation confounding factors at baseline and operation, setting and  
24 confounding factors with an interaction with time i.e. operative factors and settings influence the  
25 change in outcome but not the baseline response. In single-level models, the effect of BMI was  
26 modelled using restricted cubic splines and adjusted for confounding factors using standard regression  
27 approaches.  
28  
29  
30  
31  
32  
33  
34

### 35 **Missing data**

36 Due to the method of data collection in the national PROMS program, item non-response is masked.  
37 Defacto mean imputation of up to two missing items in the OHS occurred automatically. In addition,  
38 despite valid values appearing with individual OHS items, if the questionnaire was marked as “not  
39 complete”, implausible overall scores were obtained. For simplicity only patients with complete pre-  
40 operative and post-operative PROMS were used in the analysis. BMI is missing in a substantial  
41 proportion of the cohort. Patients prior to 2004 did not have BMI recorded, and the proportion of  
42 patients with missing BMI in 2004 is large. In 2009 ~40% of patients did not have BMI recorded; this  
43 reduced year on year and in 2016 was ~18% of eligible patients.  
44  
45  
46  
47  
48  
49

50 For pedagogic simplicity we use complete-case analyses throughout.  
51

### 52 **Patient and Public Involvement**

53 Patient representatives sit on the committee structure of the National Joint Registry. The research  
54 priorities of the National Joint Registry are identified by this committee structure and approved by the  
55 patient representatives. Patients were not involved in the setting of the research question or the  
56 outcome measures, nor were they involved in designing or implementing this work or interpretation of  
57  
58  
59  
60

1  
2  
3 the results. We are unable to disseminate results of this study directly to study participants due to the  
4 anonymous nature of the data. We plan to disseminate our findings to the National Joint Registry, via  
5 their communications team, to relevant individuals with regards to the provision of joint replacement  
6 and to the general population through the local and national press.  
7  
8  
9

## 10 **Results**

### 11 **Simulation Study**

12  
13 Figure 4 illustrate the results from the MC simulation for each DGP. It is clear that MLM, OLS  
14 methods, and in DGP's 1, 3, and 4 (observational scenarios) single-level Tobit models all exhibit  
15 substantial bias. Only the ML Tobit with 3 datapoints provides unbiased estimates in all scenarios.  
16 Constrained ML Tobit models are close to being unbiased, but slightly over estimate the effect size,  
17 see Table 1, Single-level Tobit models also provide unbiased estimates for DGP 2 (the randomised  
18 trial). Empirical standard error, mean squared error, relative error and relative precision for each of  
19 the methods are reported in Supplementary. Table 1.  
20  
21  
22  
23  
24  
25

26 Figure 5 illustrates the spread of model based standard errors (SE) for each method by DGP. It is clear  
27 that the variation and absolute magnitude of SE in MLM with 3 data points per person is less than that  
28 of ML Tobit Models. Similarly, model based SEs from OLS methods are smaller and less variable  
29 than single-level Tobit methods. In DGP 2, the randomised trial, it is interesting to note that the SE  
30 from Tobit ANCOVA models are marginally smaller than for Tobit SACS. Whilst there is little  
31 difference in terms of bias from the constrained ML Tobit models, see Figure 4, the size and  
32 variability of estimated SEs increased with increasing value of the constrained of  $\sigma_{\epsilon}^2$ .  
33  
34  
35  
36  
37

38 Supplementary. Figure 4 to Supplementary. Figure 15, illustrate the coverage of 95% confidence  
39 intervals in each DGP. Unsurprisingly, coverage of methods which demonstrate bias is very poor,  
40 whilst coverage is at nominal levels for the ML Tobit model with three data points. The results from  
41 constrained ML Tobit indicate coverage less than the nominal levels. Coverage less than the  
42 advertised levels is principally due to the bias in estimate. However, when the estimates from the  
43 model are unbiased, as in DGP 2 with  $\sigma_{\epsilon}^2=5$ , coverage is poor, suggesting bias in model based SE, i.e.  
44 they are too small.  
45  
46  
47  
48  
49

### 50 **National Joint Registry of England, Wales, Northern Ireland, and the Isle of Man.**

51  
52 Following application of inclusion and exclusion criteria, there were 162,513 patients with pre and  
53 post-operative OHS available for analysis. Figure 6 illustrates the results of the exemplar dataset using  
54 different approaches whilst attempting to estimate the effect of BMI category on the efficacy of  
55 surgery, whereas Figure 7 and Figure 8 illustrate the use of restricted cubic splines to assess the same  
56 question.  
57  
58  
59  
60

### Exemplar Analysis

A single-level OLS SACS approach suggests a positive association between BMI and change in OHS i.e. patients with greater BMIs have greater gains in well-being, whereas OLS ANCOVA and OLS post score models suggest a negative association. The single-level Post model score is approximately 50% greater than the ANCOVA model. All single-level Tobit models suggest a negative association between BMI and OHS. The Tobit SACS model is the smallest, with both the Tobit ANCOVA and Post models estimating substantially larger effects. The constrained ML Tobit models all provide equivalent (to 2 decimal places) results, suggesting there is no effect of BMI on the change in OHS pre and post surgery, see Figure 6.

### Restricted Cubic Spline Approach

Crude analyses, which model BMI using restricted cubic splines, illustrate a complex association between BMI and pre-operative OHS. A ~4.5 point reduction in OHS is observed as BMI increases between 20 and 50 kg.m<sup>-2</sup>. However, the change in OHS between pre- and post- surgery is very weakly associated with pre-operative BMI, with individuals with BMI's <25 kg.m<sup>-2</sup> and >45 kg.m<sup>-2</sup> receiving modestly greater gains than those patients with an average BMI of 28 kg.m<sup>-2</sup>. However, with less than ½ a unit variation across the range of BMI observed in the cohort, the difference falls well below anything that could be considered clinically meaningful, see Figure 7. Following adjustment for patient factors, operation factors, centre factors, consultant factors, and deprivation there was little difference in the pattern of change compared to crude results, see Figure 7. Single-level approaches are illustrated in Figure 8, with OLS and Tobit models giving similar patterns of results. ANCOVA and the post model specification suggest a strong inverse association with BMI, with obese individuals receiving less improvement following surgery. OLS SACS indicate that obesity is associated with greater gains in OHS following surgery. Conversely, Tobit SACS models indicate that obesity is associated with smaller gains in OHS following surgery.

## Discussion

The results of the simulation study clearly illustrate that, in the presence of floor and ceiling effects, neither baseline adjustment, or simple analysis of change scores (SACS) will yield unbiased estimates of the effect of an exposure on the outcome of interest. Single-level modifications to account for floor and ceiling effects such as the Tobit model only work in the context of a randomised trial, i.e. when there is no difference between baseline values by BMI. Importantly, single-level methods, OLS and Tobit models, induce significant bias, with negligible coverage, when  $\beta_3 = 0$  i.e. there is no change in the pre- post- surgery well being by BMI. Fully identified MLTM with three measurement occasions, return unbiased estimates with coverage close to advertised levels. In pre- post- designs

1  
2  
3 with two measurement occasions ML Tobit models, with constrained level 1 variances, return  
4 estimates very close to being unbiased, but coverage is less than advertised indicating bias in the  
5 model based standard errors.  
6  
7

8 The simulation study is consistent with a lay intuition with respect to analyses of floor and ceiling  
9 effects. Assuming we accept that either the MLM and OLS change analyses are appropriate in the  
10 absence of floor and ceiling effects, DGP 1 illustrates that when there is no effect of obesity on the  
11 efficacy of surgery, the addition of an artificial ceiling compresses the gain of individuals towards the  
12 top of the distribution. Due to the baseline association between obesity and well-being, underweight  
13 individuals tend to have gains that are more compressed compared to obese individuals. This  
14 inevitably induces bias, and provides evidence of a change in pre- post- surgery wellbeing by BMI,  
15 where none actually exist. Similarly, in DGP 2 (no baseline differences) where there is truly an  
16 interaction effect, will also lead to biased estimates. The DGP used in the simulation assumes  
17 underweight individuals benefit more from surgery than heavier individuals, which results in a  
18 fanning out of the trajectories. Underweight individuals have truly greater gains than obese  
19 individuals, but these gains are underestimated due to the ceiling effect, resulting in bias towards the  
20 null. In DGPs 3 and 4 (baseline differences in BMI, and interaction between BMI and change) we see  
21 a more extreme pattern of results compared to DGP 2, but overall consistency with the expected  
22 response of compressing individual gains which have initially higher starting values.  
23  
24  
25  
26  
27  
28  
29  
30  
31  
32

33 In the exemplar analysis of NJR data, the pattern of results is very similar to that of DGP 1 of the  
34 simulation, suggesting that results of the simulation are likely to be replicated in real world datasets.  
35 The more comprehensive analysis of the NJR data, using RCS to reflect the continuous nature of  
36 BMI, aptly illustrate where the effects from mis-specified single-level models are arising from. The  
37 ML Tobit model illustrates a strong negative association between BMI and pre-operative OHS, and  
38 failing to account for these baseline differences appropriately when attempting to estimate change  
39 leads to variation at baseline being incorporated in the estimate of change. Furthermore, the ability to  
40 adjust both baseline and post-surgical OHS for their pronounced floor and ceiling effects respectively,  
41 leads to unbiased estimates of the effect of interest. Unfortunately, due to the constraints on the level 1  
42 variance, interpretation of the random effects are difficult, as they depend on the magnitude of the  
43 variance applied in the constraint, see Supplementary.Figure 16. However, the models clearly  
44 illustrate that change in PROMS following THR do not depend on BMI, and surgery appears to be  
45 effective for patients regardless of their BMI.  
46  
47  
48  
49  
50  
51  
52  
53

## 54 **Conclusion**

55 Floors and ceilings in PROM instruments have somewhat predictable effects on estimated coefficients  
56 from standard OLS models that do not adjust for floor or ceiling effects, assuming the true underlying  
57 association is known. As this is rarely the case, it is important to consider a variety of different data  
58  
59  
60

1  
2  
3 generating processes to explore the likely impact on an analysis. It is important to consider the  
4 validity of the assumptions underpinning the Tobit model, i.e. that the latent response is truly  
5 continuous and that there is a true ceiling just beyond the range of the measurement being used.  
6  
7

8 Single-level Tobit models do not ameliorate floor and ceiling effects in simple analysis of change  
9 scores. However, ML Tobit models appear to recover the effects of interest under specific  
10 assumptions. The analysis of pre- post- designs require further constraints to ensure models are fully  
11 identified. The difference between analytical approaches can profoundly alter the interpretation of  
12 the model parameters, and this may have serious consequences if used to generate policy  
13 inappropriately. For example, inappropriate analyses that fail to consider data generating process  
14 appropriately may lead to the restriction of joint replacement for overweight or obese patients.  
15  
16  
17  
18  
19

20 When designing a study to investigate the effect of an exposure on change in health status, it would be  
21 preferable to use a measurement instrument that does not have floor or ceiling effects as inference is  
22 less complicated, and design trumps analysis in most scenarios. If the use of measurement instrument  
23 with floor and ceiling effects is unavoidable, it is preferable to collect data at 3 time points which  
24 ensure models are fully identified, alleviating the need to constrain level 1 variance in order to  
25 identify models, again design trumps analysis. If retrospective analysis of pre-post data sets are  
26 required, it appears that using ML Tobit model with constrained level 1 error variance would be  
27 preferable to single-level approaches.  
28  
29  
30  
31  
32

33 Broadly speaking the analyses of this simulation are in agreement with the work of Glymour et al.,  
34 that analysis of change and its interaction with an exposure at baseline, should not be adjusted for  
35 baseline measurements in observational data. The presence of floor and ceiling effects in data requires  
36 additional assumptions which makes things marginally more complex.  
37  
38  
39

### 40 **Data Access**

41  
42 Data may be obtained from a third party and are not publicly available. Access to the data can be  
43 made via research requests to the National Joint Registry of England, Wales, Northern Ireland and the  
44 Isle of Man. Full details can be found at [http://www.njrcentre.org.uk/njrcentre/Research/Research-](http://www.njrcentre.org.uk/njrcentre/Research/Research-requests)  
45 requests.  
46  
47  
48  
49  
50

### 51 **Role of the funding source**

52  
53 The Medical Research Council or National Institute of Health Research had no role in the design and  
54 conduct of the study; collection, management, analysis, and interpretation of the data; preparation,  
55 review, or approval of the manuscript; and decision to submit the manuscript for publication  
56  
57  
58  
59  
60

## **Acknowledgements**

We thank the patients and staff of all the hospitals who have contributed data to the National Joint Registry. We are grateful to the Healthcare Quality Improvement Partnership, the National Joint Registry Steering Committee, and staff at the National Joint Registry for facilitating this work. The views expressed represent those of the authors and do not necessarily reflect those of the National Joint Registry Steering Committee or Healthcare Quality Improvement Partnership, who do not vouch for how the information is presented.

## **Ethical approval**

Ethics approval of pseudo anonymised analysis of NJR data is considered as secondary use of clinical registry data, under HRA guidance this does not require formal ethical approval. However, all research projects are internally approved by the NJR. The full NJR privacy notice can be found online (<http://www.njrcentre.org.uk/njrcentre/About-the-NJR/Privacy-Notice-GDPR>).

## **Author contributions**

AS, MRW, AJ, AM, AWB, and YBS were responsible for the study design, AS conducted the data analysis. AS, MRW, AJ, AM, AWB, and YBS were responsible for interpreting the data. AS, MRW, AJ, AM, AWB, and YBS prepared and edited and approved the final manuscript.



## Tables

Table 1:

| Model                           | DGP 1: $\beta_3=0$ |          | DGP2 : $\beta_3=-3$ |          | DGP 3: $\beta_3=-3$ |          | DGP 4 : $\beta_3=-3$ |          |
|---------------------------------|--------------------|----------|---------------------|----------|---------------------|----------|----------------------|----------|
| Estimate                        |                    |          |                     |          |                     |          |                      |          |
| MLM                             | 1.1                | (0.0024) | -1.36               | (0.0023) | -0.26               | (0.0024) | -0.23                | (0.0025) |
| ML Tobit                        | -0.0056            | (0.0038) | -3.03               | (0.0037) | -3.04               | (0.0037) | -3.01                | (0.0037) |
| ML Tobit $\sigma_\epsilon^2=5$  | -0.13              | (0.0044) | -3.01               | (0.0042) | -3.13               | (0.0046) | -2.57                | (0.0038) |
| ML Tobit $\sigma_\epsilon^2=10$ | -0.093             | (0.0044) | -3.09               | (0.0042) | -3.14               | (0.0045) | -3.05                | (0.0041) |
| ML Tobit $\sigma_\epsilon^2=15$ | -0.057             | (0.0044) | -3.09               | (0.0042) | -3.12               | (0.0045) | -3.11                | (0.0043) |
| ML Tobit $\sigma_\epsilon^2=20$ | -0.04              | (0.0044) | -3.08               | (0.0042) | -3.11               | (0.0045) | -3.12                | (0.0044) |
| ML Tobit $\sigma_\epsilon^2=25$ | -0.031             | (0.0044) | -3.07               | (0.0042) | -3.1                | (0.0045) | -3.11                | (0.0044) |
| ML Tobit $\sigma_\epsilon^2=30$ | -0.026             | (0.0044) | -3.07               | (0.0042) | -3.09               | (0.0045) | -3.1                 | (0.0045) |
| OLS SACS                        | 1.1                | (0.0024) | -1.36               | (0.0023) | -0.26               | (0.0024) | -0.23                | (0.0025) |
| OLS ANCOVA                      | -0.31              | (0.0022) | -1.36               | (0.002)  | -1.69               | (0.0021) | -2.43                | (0.0019) |
| OLS Post                        | -1.36              | (0.0023) | -1.36               | (0.0022) | -2.72               | (0.0023) | -2.69                | (0.0018) |
| Tobit SACS                      | -0.72              | (0.0044) | -3.04               | (0.0041) | -3.78               | (0.0044) | -4.83                | (0.0048) |
| Tobit ANCOVA                    | -0.5               | (0.0046) | -3.09               | (0.0042) | -3.61               | (0.0045) | -5.5                 | (0.0042) |
| Tobit Post                      | -3.07              | (0.0049) | -3.06               | (0.0047) | -6.13               | (0.005)  | -6.14                | (0.004)  |
| Coverage                        |                    |          |                     |          |                     |          |                      |          |
| MLM                             | 0                  | (0)      | 0                   | (0)      | 0                   | (0)      | 0                    | (0)      |
| ML Tobit                        | 94.8               | (0.7)    | 95.3                | (0.67)   | 93.9                | (0.76)   | 95.4                 | (0.66)   |
| ML Tobit $\sigma_\epsilon^2=5$  | 67.5               | (1.48)   | 86.7                | (1.07)   | 71.6                | (1.43)   | 4.6                  | (0.66)   |
| ML Tobit $\sigma_\epsilon^2=10$ | 83.5               | (1.17)   | 85                  | (1.13)   | 77.4                | (1.32)   | 92.2                 | (0.85)   |
| ML Tobit $\sigma_\epsilon^2=15$ | 91.1               | (0.9)    | 87.7                | (1.04)   | 85.7                | (1.11)   | 86.8                 | (1.07)   |
| ML Tobit $\sigma_\epsilon^2=20$ | 92.7               | (0.82)   | 90                  | (0.95)   | 88.2                | (1.02)   | 87.1                 | (1.06)   |
| ML Tobit $\sigma_\epsilon^2=25$ | 93.4               | (0.79)   | 91.6                | (0.88)   | 89.5                | (0.97)   | 88.2                 | (1.02)   |
| ML Tobit $\sigma_\epsilon^2=30$ | 93.6               | (0.77)   | 91.9                | (0.86)   | 91.1                | (0.9)    | 88.9                 | (0.99)   |
| OLS SACS                        | 0                  | (0)      | 0                   | (0)      | 0                   | (0)      | 0                    | (0)      |
| OLS ANCOVA                      | 0.8                | (0.28)   | 0                   | (0)      | 0                   | (0)      | 0                    | (0)      |
| OLS Post                        | 0                  | (0)      | 0                   | (0)      | 2.4                 | (0.48)   | 0                    | (0)      |
| Tobit SACS                      | 0.1                | (0.1)    | 94.4                | (0.73)   | 0                   | (0)      | 0                    | (0)      |
| Tobit ANCOVA                    | 7.2                | (0.82)   | 89.7                | (0.96)   | 1.2                 | (0.34)   | 0                    | (0)      |
| Tobit Post                      | 0                  | (0)      | 93.3                | (0.79)   | 0                   | (0)      | 0                    | (0)      |
| Model SE                        |                    |          |                     |          |                     |          |                      |          |
| MLM                             | 0.074              | (2E-05)  | 0.074               | (2E-05)  | 0.077               | (2E-05)  | 0.078                | (2E-05)  |
| ML Tobit                        | 0.12               | (3E-05)  | 0.12                | (3E-05)  | 0.12                | (3E-05)  | 0.12                 | (3E-05)  |
| ML Tobit $\sigma_\epsilon^2=5$  | 0.1                | (3E-05)  | 0.1                 | (3E-05)  | 0.11                | (3E-05)  | 0.11                 | (4E-05)  |
| ML Tobit $\sigma_\epsilon^2=10$ | 0.12               | (3E-05)  | 0.12                | (3E-05)  | 0.13                | (4E-05)  | 0.12                 | (3E-05)  |
| ML Tobit $\sigma_\epsilon^2=15$ | 0.13               | (4E-05)  | 0.13                | (4E-05)  | 0.14                | (4E-05)  | 0.13                 | (3E-05)  |
| ML Tobit $\sigma_\epsilon^2=20$ | 0.13               | (5E-05)  | 0.13                | (5E-05)  | 0.14                | (5E-05)  | 0.14                 | (4E-05)  |
| ML Tobit $\sigma_\epsilon^2=25$ | 0.14               | (5E-05)  | 0.13                | (5E-05)  | 0.14                | (6E-05)  | 0.14                 | (5E-05)  |
| ML Tobit $\sigma_\epsilon^2=30$ | 0.14               | (5E-05)  | 0.13                | (5E-05)  | 0.15                | (6E-05)  | 0.14                 | (5E-05)  |
| OLS SACS                        | 0.074              | (2E-05)  | 0.074               | (2E-05)  | 0.077               | (2E-05)  | 0.078                | (2E-05)  |
| OLS ANCOVA                      | 0.07               | (2E-05)  | 0.065               | (2E-05)  | 0.072               | (2E-05)  | 0.059                | (2E-05)  |
| OLS Post                        | 0.07               | (2E-05)  | 0.07                | (2E-05)  | 0.072               | (2E-05)  | 0.055                | (2E-05)  |
| Tobit SACS                      | 0.13               | (5E-05)  | 0.13                | (5E-05)  | 0.14                | (6E-05)  | 0.15                 | (6E-05)  |
| Tobit ANCOVA                    | 0.14               | (6E-05)  | 0.14                | (6E-05)  | 0.15                | (6E-05)  | 0.13                 | (6E-05)  |
| Tobit Post                      | 0.15               | (7E-05)  | 0.15                | (6E-05)  | 0.16                | (7E-05)  | 0.13                 | (6E-05)  |

1  
2  
3  
4  
5  
6  
7  
8  
9  
10  
11  
12  
13  
14  
15  
16  
17  
18  
19  
20  
21  
22  
23  
24  
25  
26  
27  
28  
29  
30  
31  
32  
33  
34  
35  
36  
37  
38  
39  
40  
41  
42  
43  
44  
45  
46  
47  
48  
49  
50  
51  
52  
53  
54  
55  
56  
57  
58  
59  
60

For peer review only



## Figure Legends

Figure 1: Graphical illustration of a multi-level random intercept and slope model used to generate data for a individual with average BMI.

Figure 2: Graphical illustration of the data generating process of the latent, measured, and measured response with floor and ceiling effects. The Latent Response is  $y_{ij}^*$ , the measured response is  $y_{ij}$ , and the measured response with censoring is  $y_{ij}^{FC}$ .

Figure 3: Graphical Illustration of the four Data Generating Processes used to investigate the effect of floor and ceiling effects on analysis of pre-post surgery change with BMI as an exposure. Horizontal red lines at 0 and 48 indicate floor and ceilings of the measurement instrument.

Figure 4: Plot of 1000 estimates by each DGP, for each method of analysis. Within each method, the vertical axis is the repetition number of each simulated dataset. The white pipe symbol is the average of the estimates.

Figure 5: Plot of 1000 estimated Standard Errors by each DGP, for each method of analysis. Within each method, the vertical axis is the repetition number of each simulated dataset. The white pipe symbol is the average of the standard errors.

Figure 6: Estimate and 95% Confidence Intervals of constrained ML Tobit, Single-level OLS and Tobit: ANCOVA, SACS, and Post models.

Figure 7: Estimates and 95% confidence intervals of baseline and change in Oxford Hip Score (OHS) pre and post surgery and its association with Body Mass Index (BMI) adjusted for confounding.

Figure 8: Estimates and 95% confidence intervals of single-level approaches to the analysis of change in Oxford Hip Score (OHS) pre and post surgery and its association with Body Mass Index (BMI) adjusted for confounding.

## References

1. Frison L, Pocock SJ. Repeated measures in clinical trials: analysis using mean summary statistics and its implications for design. *Stat Med* 1992;11(13):1685-704. [published Online First: 1992/09/30]
2. Goldstein H. Tutorial in biostatistics-longitudinal data analysis (repeated measures) in clinical trials. *Stat Med* 2000;19(13):1821. [published Online First: 2000/06/22]
3. Kaiser L. Adjusting for baseline: change or percentage change? *Stat Med* 1989;8(10):1183-90. [published Online First: 1989/10/01]
4. Matthews JN, Campbell MJ. Adjusting for baseline: change or percentage change. *Stat Med* 1992;11(12):1624-6. [published Online First: 1992/09/15]
5. Senn S. Repeated measures in clinical trials: analysis using mean summary statistics and its implications for design. *Stat Med* 1994;13(2):197-8. [published Online First: 1994/01/30]
6. Senn S. Change from baseline and analysis of covariance revisited. *Stat Med* 2006;25(24):4334-44. doi: 10.1002/sim.2682 [published Online First: 2006/08/22]

- 1
  - 2
  - 3
  - 4
  - 5
  - 6
  - 7
  - 8
  - 9
  - 10
  - 11
  - 12
  - 13
  - 14
  - 15
  - 16
  - 17
  - 18
  - 19
  - 20
  - 21
  - 22
  - 23
  - 24
  - 25
  - 26
  - 27
  - 28
  - 29
  - 30
  - 31
  - 32
  - 33
  - 34
  - 35
  - 36
  - 37
  - 38
  - 39
  - 40
  - 41
  - 42
  - 43
  - 44
  - 45
  - 46
  - 47
  - 48
  - 49
  - 50
  - 51
  - 52
  - 53
  - 54
  - 55
  - 56
  - 57
  - 58
  - 59
  - 60
7. Senn S, Stevens L, Chaturvedi N. Repeated measures in clinical trials: simple strategies for analysis using summary measures. *Stat Med* 2000;19(6):861-77. [published Online First: 2000/03/29]
8. Vickers AJ. The use of percentage change from baseline as an outcome in a controlled trial is statistically inefficient: a simulation study. *BMC medical research methodology* 2001;1:6. [published Online First: 2001/07/19]
9. Vickers AJ, Altman DG. Statistics notes: Analysing controlled trials with baseline and follow up measurements. *BMJ* 2001;323(7321):1123-4. [published Online First: 2001/11/10]
10. Glymour MM, Weuve J, Berkman LF, et al. When is baseline adjustment useful in analyses of change? An example with education and cognitive change. *Am J Epidemiol* 2005;162(3):267-78. doi: 10.1093/aje/kwi187 [published Online First: 2005/07/01]
11. Twisk J. Applied longitudinal data analysis for epidemiology : a practical guide. Cambridge: Cambridge University Press 2004:167-178.
12. Twisk J, Rijmen F. Longitudinal tobit regression: a new approach to analyze outcome variables with floor or ceiling effects. *J Clin Epidemiol* 2009;62(9):953-8. doi: 10.1016/j.jclinepi.2008.10.003 [published Online First: 2009/02/13]
13. Holla JFM, van Beers-Tas MH, van de Stadt LA, et al. Depressive mood and low social support are not associated with arthritis development in patients with seropositive arthralgia, although they predict increased musculoskeletal symptoms. *RMD Open* 2018;4(1):e000653. doi: 10.1136/rmdopen-2018-000653 [published Online First: 2018/07/19]
14. Moran LJ, Fraser LM, Sundernathan T, et al. The effect of an antenatal lifestyle intervention in overweight and obese women on circulating cardiometabolic and inflammatory biomarkers: secondary analyses from the LIMIT randomised trial. *BMC Med* 2017;15(1):32. doi: 10.1186/s12916-017-0790-z [published Online First: 2017/02/15]
15. Ravona-Springer R, Moshier E, Schmeidler J, et al. Changes in glycemic control are associated with changes in cognition in non-diabetic elderly. *J Alzheimers Dis* 2012;30(2):299-309. doi: 10.3233/JAD-2012-120106 [published Online First: 2012/03/20]
16. Zhu L, Gonzalez J. Modeling Floor Effects in Standardized Vocabulary Test Scores in a Sample of Low SES Hispanic Preschool Children under the Multilevel Structural Equation Modeling Framework. *Front Psychol* 2017;8:2146. doi: 10.3389/fpsyg.2017.02146 [published Online First: 2018/01/10]
17. Coombes R. Rationing of joint replacements raises fears of further cuts. *BMJ* 2005;331(7528):1290. doi: 10.1136/bmj.331.7528.1290 [published Online First: 2005/12/03]
18. Finer N. Rationing joint replacements: trust's decision seems to be based on prejudice or attributing blame. *BMJ* 2005;331(7530):1472. doi: 10.1136/bmj.331.7530.1472-a [published Online First: 2005/12/17]
19. McNicol MW. Rationing joint replacements: ...and is false economy resulting in overall damage. *BMJ* 2005;331(7530):1473. doi: 10.1136/bmj.331.7530.1473 [published Online First: 2005/12/17]
20. Workgroup of the American Association of Hip and Knee Surgeons Evidence Based Committee. Obesity and total joint arthroplasty: a literature based review. *J Arthroplasty* 2013;28(5):714-21. doi: 10.1016/j.arth.2013.02.011 [published Online First: 2013/03/23]

$$\beta_0 = 10, \beta_1 = 10, \sigma_{u0} = 10, \sigma_{u1} = 15, \sigma_\varepsilon = 3$$

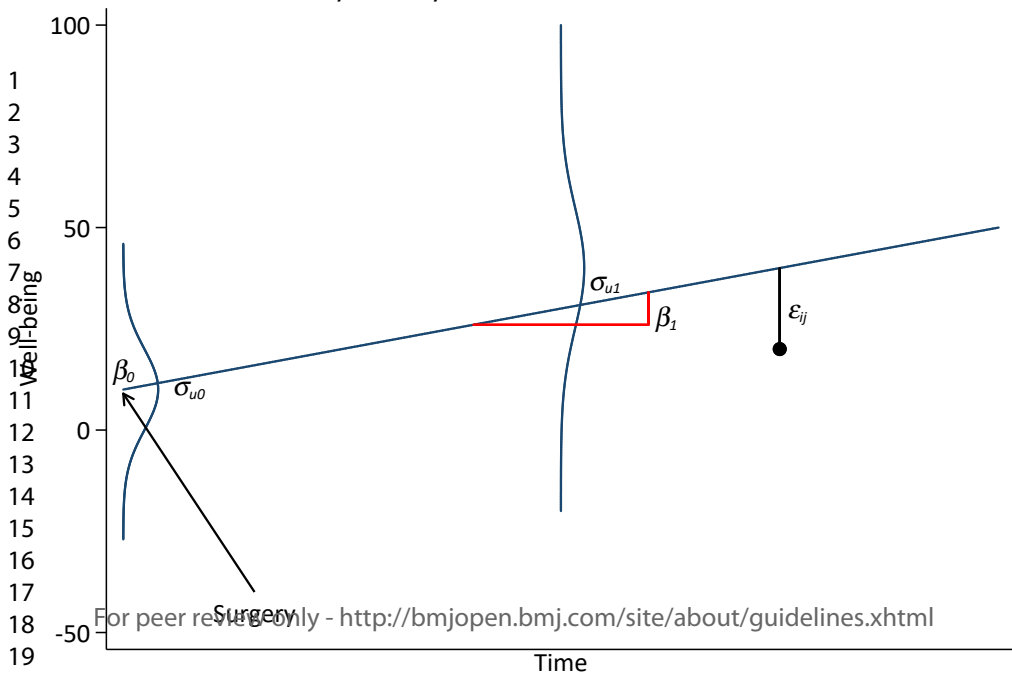

Latent Response

BMJ Open

Measured response

1  
2  
3  
4  
5  
6  
7  
8  
9  
10  
11  
12  
13  
14  
15  
16  
17  
18  
19  
20

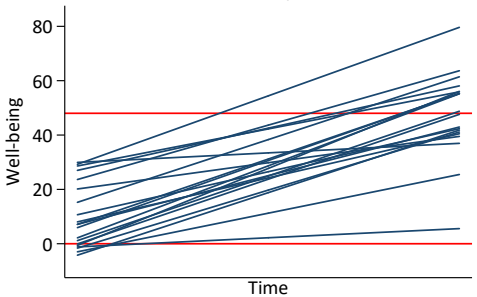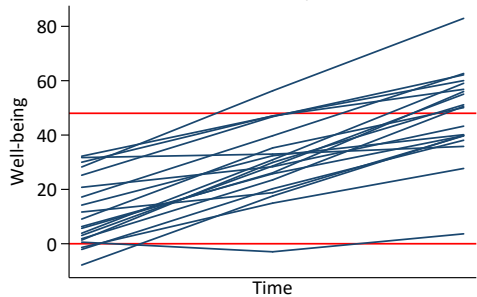

Measured response with censoring

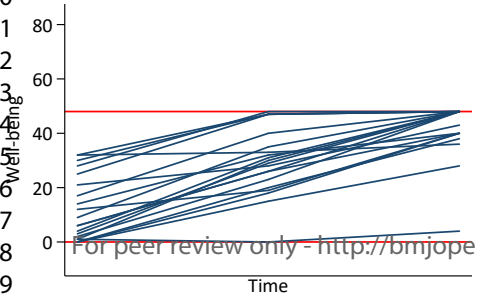

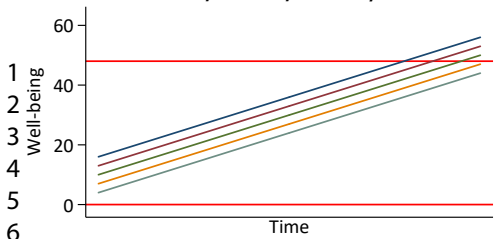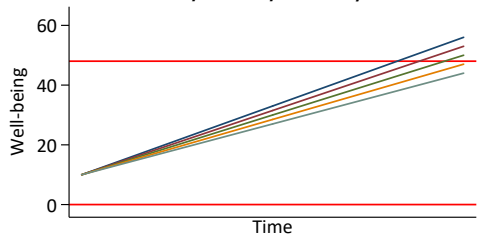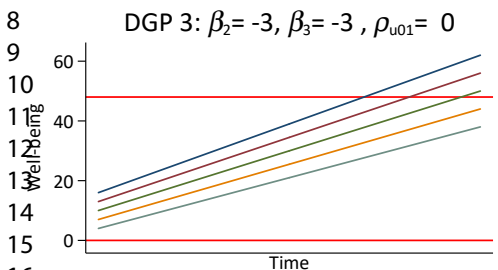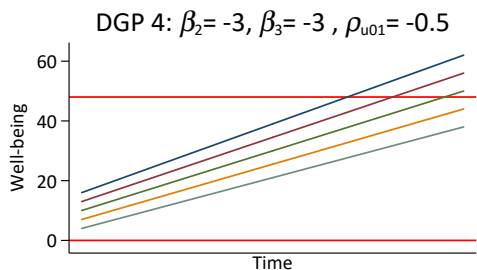

DGP 1:  $\beta_3=0$

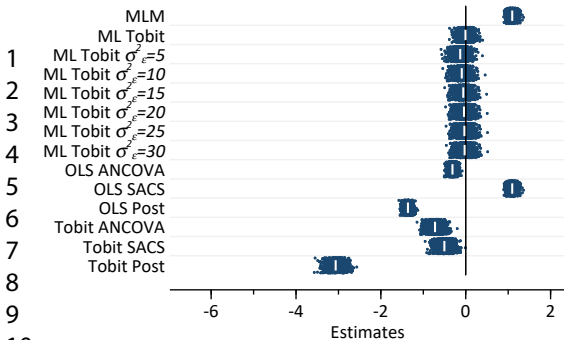

DGP 2:  $\beta_3=-3$

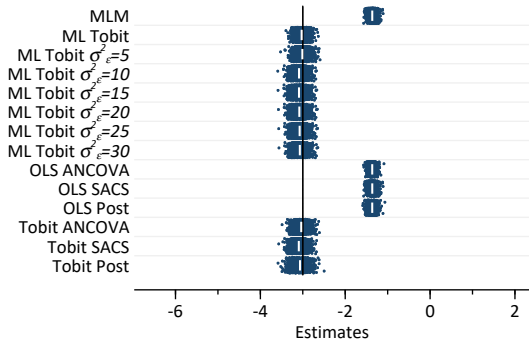

DGP 3:  $\beta_3=-3$

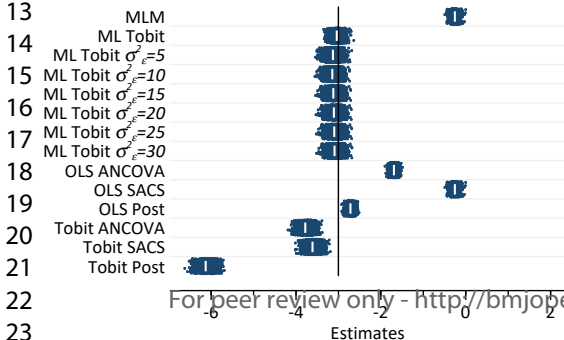

DGP 4:  $\beta_3=-3$

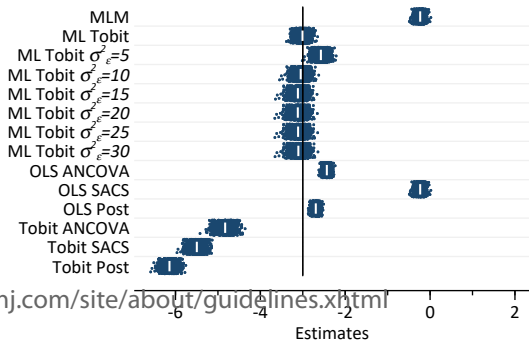

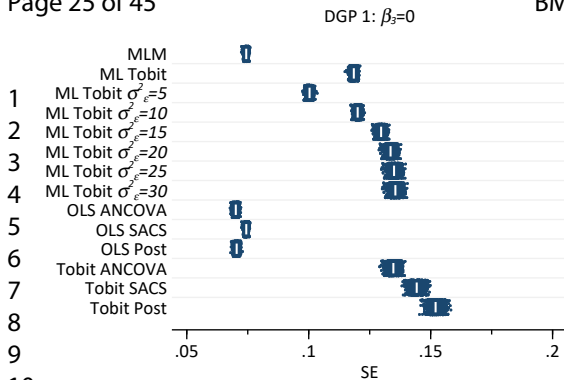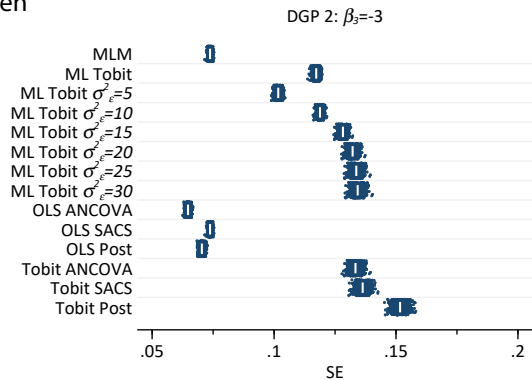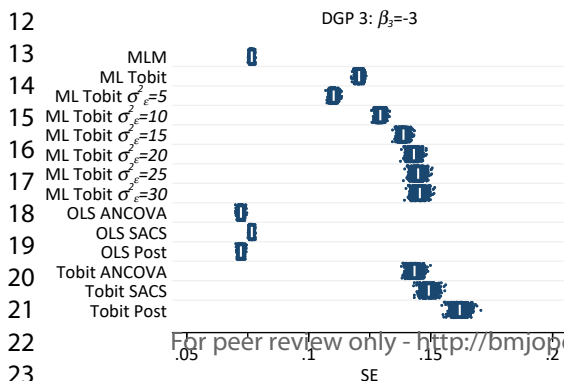

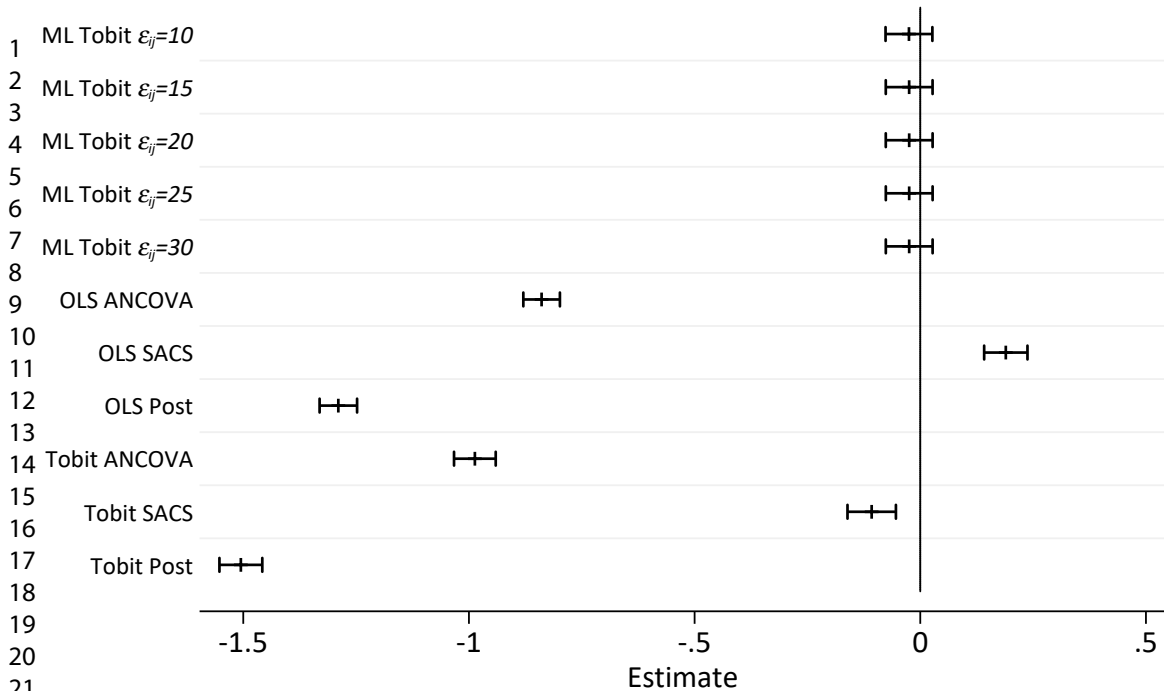

For peer review only - <http://bmjopen.bmj.com/site/about/guidelines.xhtml>

+ Estimate      |-----| 95% CI



1  
2  
3  
4  
5  
6  
7  
8  
9  
10  
11  
12  
13  
14  
15  
16  
17  
18  
19  
20  
21  
22  
23  
24  
25  
26  
27  
28  
29  
30  
31  
32  
33  
34  
35  
36  
37  
38  
39  
40  
41  
42  
43  
44  
45  
46  
47  
48  
49  
50  
51  
52  
53

Crude

BMJ Open

Patient adj.

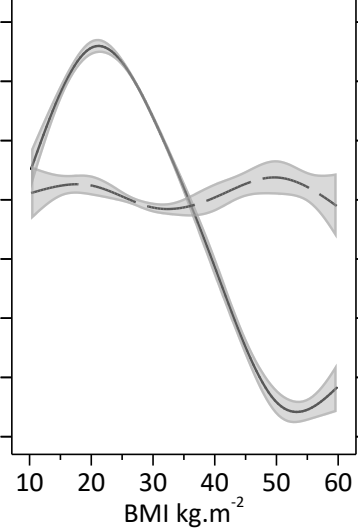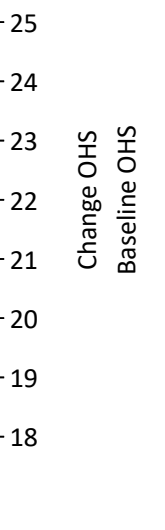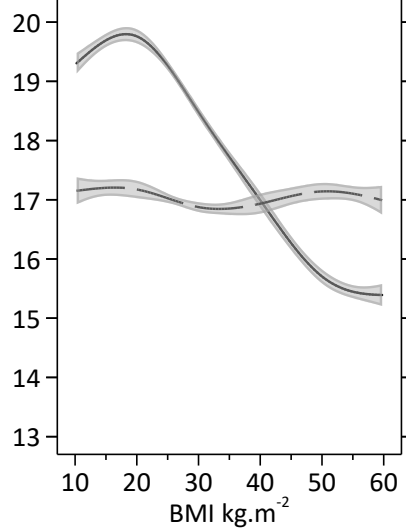

Surgeon adj.

Centre adj.

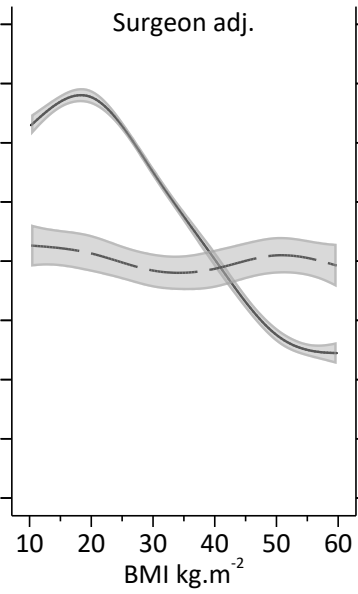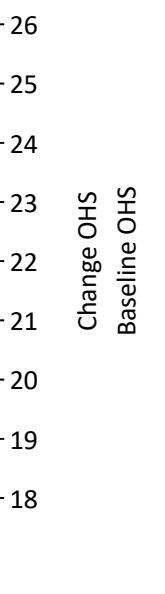

Deprivation adj.

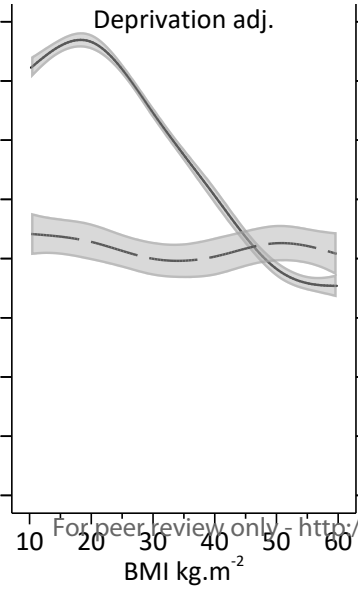

— Baseline  
 ■ 95% CI  
 - - - Change

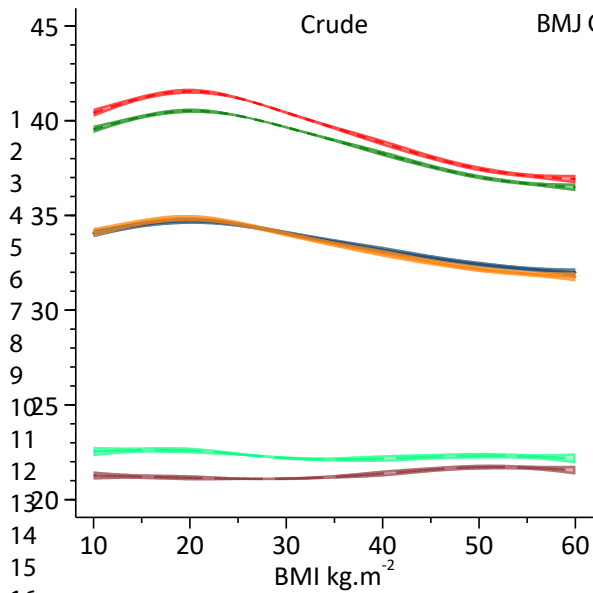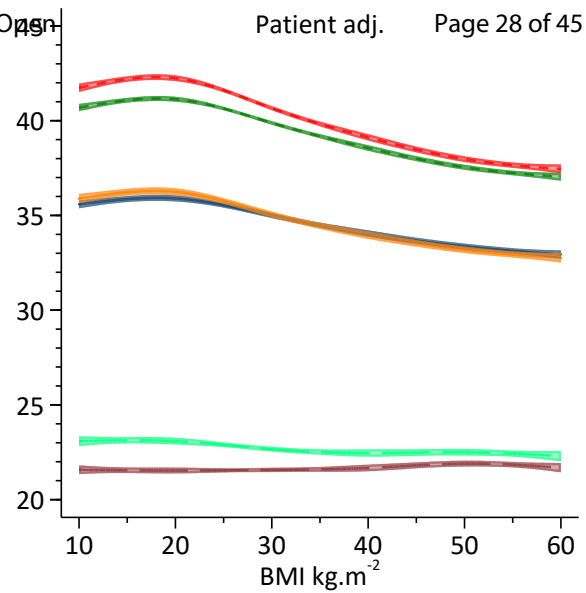

## Supplementary Tables

Supplementary Table 1: Simulation estimates of performance characteristics (Monte Carlo Standard Error in parentheses)

| Model                              | DGP 1: $\beta_3 = 0$               | DGP 2 : $\beta_3 = -3$ | DGP 3: $\beta_3 = -3$ | DGP 4 : $\beta_3 = -3$ |                |                |
|------------------------------------|------------------------------------|------------------------|-----------------------|------------------------|----------------|----------------|
| Empirical SE                       | MLM                                | 0.075 (0.0017)         | 0.072 (0.0016)        | 0.075 (0.0017)         | 0.079 (0.0018) |                |
|                                    | ML Tobit                           | 0.12 (0.0027)          | 0.12 (0.0026)         | 0.12 (0.0026)          | 0.12 (0.0026)  |                |
|                                    | ML Tobit $\sigma_\varepsilon^2=5$  | 0.14 (0.0031)          | 0.13 (0.0029)         | 0.14 (0.0032)          | 0.12 (0.0027)  |                |
|                                    | ML Tobit $\sigma_\varepsilon^2=10$ | 0.14 (0.0031)          | 0.13 (0.003)          | 0.14 (0.0032)          | 0.13 (0.0029)  |                |
|                                    | ML Tobit $\sigma_\varepsilon^2=15$ | 0.14 (0.0031)          | 0.13 (0.003)          | 0.14 (0.0032)          | 0.14 (0.003)   |                |
|                                    | ML Tobit $\sigma_\varepsilon^2=20$ | 0.14 (0.0031)          | 0.13 (0.003)          | 0.14 (0.0032)          | 0.14 (0.0031)  |                |
|                                    | ML Tobit $\sigma_\varepsilon^2=25$ | 0.14 (0.0031)          | 0.13 (0.003)          | 0.14 (0.0032)          | 0.14 (0.0031)  |                |
|                                    | ML Tobit $\sigma_\varepsilon^2=30$ | 0.14 (0.0031)          | 0.13 (0.003)          | 0.14 (0.0032)          | 0.14 (0.0031)  |                |
|                                    | OLS SACS                           | 0.075 (0.0017)         | 0.072 (0.0016)        | 0.075 (0.0017)         | 0.079 (0.0018) |                |
|                                    | OLS ANCOVA                         | 0.07 (0.0016)          | 0.064 (0.0014)        | 0.068 (0.0015)         | 0.059 (0.0013) |                |
|                                    | OLS Post                           | 0.072 (0.0016)         | 0.07 (0.0016)         | 0.071 (0.0016)         | 0.056 (0.0013) |                |
|                                    | Tobit SACS                         | 0.14 (0.0031)          | 0.13 (0.0029)         | 0.14 (0.0031)          | 0.15 (0.0034)  |                |
|                                    | Tobit ANCOVA                       | 0.14 (0.0032)          | 0.13 (0.003)          | 0.14 (0.0032)          | 0.13 (0.003)   |                |
|                                    | Tobit Post                         | 0.16 (0.0035)          | 0.15 (0.0034)         | 0.16 (0.0035)          | 0.13 (0.0028)  |                |
|                                    | Mean Square Error                  | MLM                    | 1.21 (0.0052)         | 2.69 (0.0075)          | 7.54 (0.013)   | 7.66 (0.014)   |
|                                    |                                    | ML Tobit               | 0.014 (0.0007)        | 0.014 (0.0006)         | 0.015 (0.0007) | 0.014 (0.0006) |
| ML Tobit $\sigma_\varepsilon^2=5$  |                                    | 0.036 (0.0015)         | 0.017 (0.0008)        | 0.038 (0.0015)         | 0.2 (0.0033)   |                |
| ML Tobit $\sigma_\varepsilon^2=10$ |                                    | 0.028 (0.0012)         | 0.025 (0.0011)        | 0.041 (0.0015)         | 0.019 (0.0009) |                |
| ML Tobit $\sigma_\varepsilon^2=15$ |                                    | 0.023 (0.001)          | 0.026 (0.0011)        | 0.035 (0.0013)         | 0.032 (0.0014) |                |
| ML Tobit $\sigma_\varepsilon^2=20$ |                                    | 0.021 (0.0009)         | 0.024 (0.001)         | 0.032 (0.0013)         | 0.033 (0.0014) |                |
| ML Tobit $\sigma_\varepsilon^2=25$ |                                    | 0.02 (0.0009)          | 0.023 (0.001)         | 0.03 (0.0012)          | 0.032 (0.0014) |                |
| ML Tobit $\sigma_\varepsilon^2=30$ |                                    | 0.02 (0.0009)          | 0.022 (0.001)         | 0.029 (0.0012)         | 0.031 (0.0014) |                |
| OLS SACS                           |                                    | 1.21 (0.0052)          | 2.69 (0.0075)         | 7.54 (0.013)           | 7.66 (0.014)   |                |
| OLS ANCOVA                         |                                    | 0.1 (0.0014)           | 2.68 (0.0066)         | 1.71 (0.0056)          | 0.33 (0.0021)  |                |
| OLS Post                           |                                    | 1.86 (0.0062)          | 2.68 (0.0073)         | 0.085 (0.0013)         | 0.097 (0.0011) |                |
| Tobit SACS                         |                                    | 0.54 (0.0064)          | 0.018 (0.0008)        | 0.63 (0.0069)          | 3.37 (0.018)   |                |
| Tobit ANCOVA                       |                                    | 0.27 (0.0046)          | 0.027 (0.0011)        | 0.39 (0.0056)          | 6.25 (0.021)   |                |
| Tobit Post                         |                                    | 9.42 (0.03)            | 0.027 (0.0012)        | 9.81 (0.031)           | 9.88 (0.025)   |                |
| Relative Error                     |                                    | MLM                    | -1.31 (2.21)          | 1.98 (2.28)            | 2.74 (2.3)     | -0.31 (2.23)   |
|                                    |                                    | ML Tobit               | -0.95 (2.22)          | 0.79 (2.25)            | 2.37 (2.29)    | 1.66 (2.27)    |
|                                    | ML Tobit $\sigma_\varepsilon^2=5$  | -28.5 (1.6)            | -22.8 (1.73)          | -23.8 (1.71)           | -7.01 (2.08)   |                |
|                                    | ML Tobit $\sigma_\varepsilon^2=10$ | -14.5 (1.91)           | -10.3 (2.01)          | -8.8 (2.04)            | -3.97 (2.15)   |                |
|                                    | ML Tobit $\sigma_\varepsilon^2=15$ | -7.35 (2.07)           | -3.54 (2.16)          | -2.41 (2.18)           | -2.46 (2.18)   |                |
|                                    | ML Tobit $\sigma_\varepsilon^2=20$ | -4.29 (2.14)           | -0.57 (2.22)          | 0.26 (2.24)            | -1.4 (2.21)    |                |
|                                    | ML Tobit $\sigma_\varepsilon^2=25$ | -3.04 (2.17)           | 0.65 (2.25)           | 1.35 (2.27)            | -0.8 (2.22)    |                |
|                                    | ML Tobit $\sigma_\varepsilon^2=30$ | -2.51 (2.18)           | 1.17 (2.26)           | 1.83 (2.28)            | -0.47 (2.23)   |                |
|                                    | OLS SACS                           | -1.3 (2.21)            | 1.99 (2.28)           | 2.75 (2.3)             | -0.3 (2.23)    |                |
|                                    | OLS ANCOVA                         | -0.5 (2.23)            | 1.51 (2.27)           | 6.84 (2.39)            | -0.54 (2.23)   |                |
|                                    | OLS Post                           | -1.96 (2.19)           | -0.086 (2.24)         | 1.46 (2.27)            | -1.25 (2.21)   |                |

|  |                                      |               |              |              |               |
|--|--------------------------------------|---------------|--------------|--------------|---------------|
|  | Tobit SACS                           | -2.97 (2.17)  | 2.09 (2.28)  | 2.82 (2.3)   | -0.056 (2.24) |
|  | Tobit ANCOVA                         | -0.19 (2.23)  | 2.21 (2.29)  | 4.01 (2.33)  | -1.35 (2.21)  |
|  | Tobit Post                           | -2.82 (2.17)  | 1.27 (2.27)  | 2.74 (2.3)   | 0.83 (2.26)   |
|  | MLM                                  | 247(14.1)     | 232.3 (13.9) | 275.4 (16.9) | 132.5 (6.66)  |
|  | ML Tobit                             | 37.8 (4.36)   | 28.3 (4.07)  | 50.5 (5.64)  | 6.08 (3.13)   |
|  | ML Tobit $\sigma_{\varepsilon}^2=5$  |               |              |              |               |
|  | ML Tobit $\sigma_{\varepsilon}^2=10$ | -0.034 (0.97) | -0.92 (1.07) | 3.91 (1.24)  | -13.3 (1.5)   |
|  | ML Tobit $\sigma_{\varepsilon}^2=15$ | 0.62 (1.22)   | -1.66 (1.37) | 3.24 (1.52)  | -22.5 (1.68)  |
|  | ML Tobit $\sigma_{\varepsilon}^2=20$ | 1.22 (1.3)    | -1.7 (1.44)  | 2.57 (1.6)   | -26 (1.7)     |
|  | ML Tobit $\sigma_{\varepsilon}^2=25$ | 1.67 (1.33)   | -1.52 (1.47) | 2.31 (1.62)  | -27.2 (1.7)   |
|  | ML Tobit $\sigma_{\varepsilon}^2=30$ | 1.99 (1.34)   | -1.34 (1.47) | 2.29 (1.63)  | -27.5 (1.69)  |
|  | OLS SACS                             | 247(14.1)     | 232.3 (13.9) | 275.4 (16.9) | 132.5 (6.66)  |
|  | OLS ANCOVA                           | 297.2(16)     | 327.4 (14.8) | 357.6 (20.9) | 310.3 (18.8)  |
|  | OLS Post                             | 281.7(15.5)   | 250 (14.8)   | 312.9 (19.2) | 360.1 (21.2)  |
|  | Tobit SACS                           | 2.26 (1.94)   | 1.8 (1.89)   | 7.48 (2.72)  | -38.6 (2.12)  |
|  | Tobit ANCOVA                         | -5.67 (3.07)  | -2.33 (1.55) | 1.52 (3.56)  | -19.1 (3.59)  |
|  | Tobit Post                           | -19.5 (2.6)   | -22.5 (2.6)  | -15.9 (2.95) | -10.6 (4.08)  |

Relative Precision

## Supplementary Figures

Supplementary Figure 1: Inclusion / Exclusion Criteria of the NJR study.

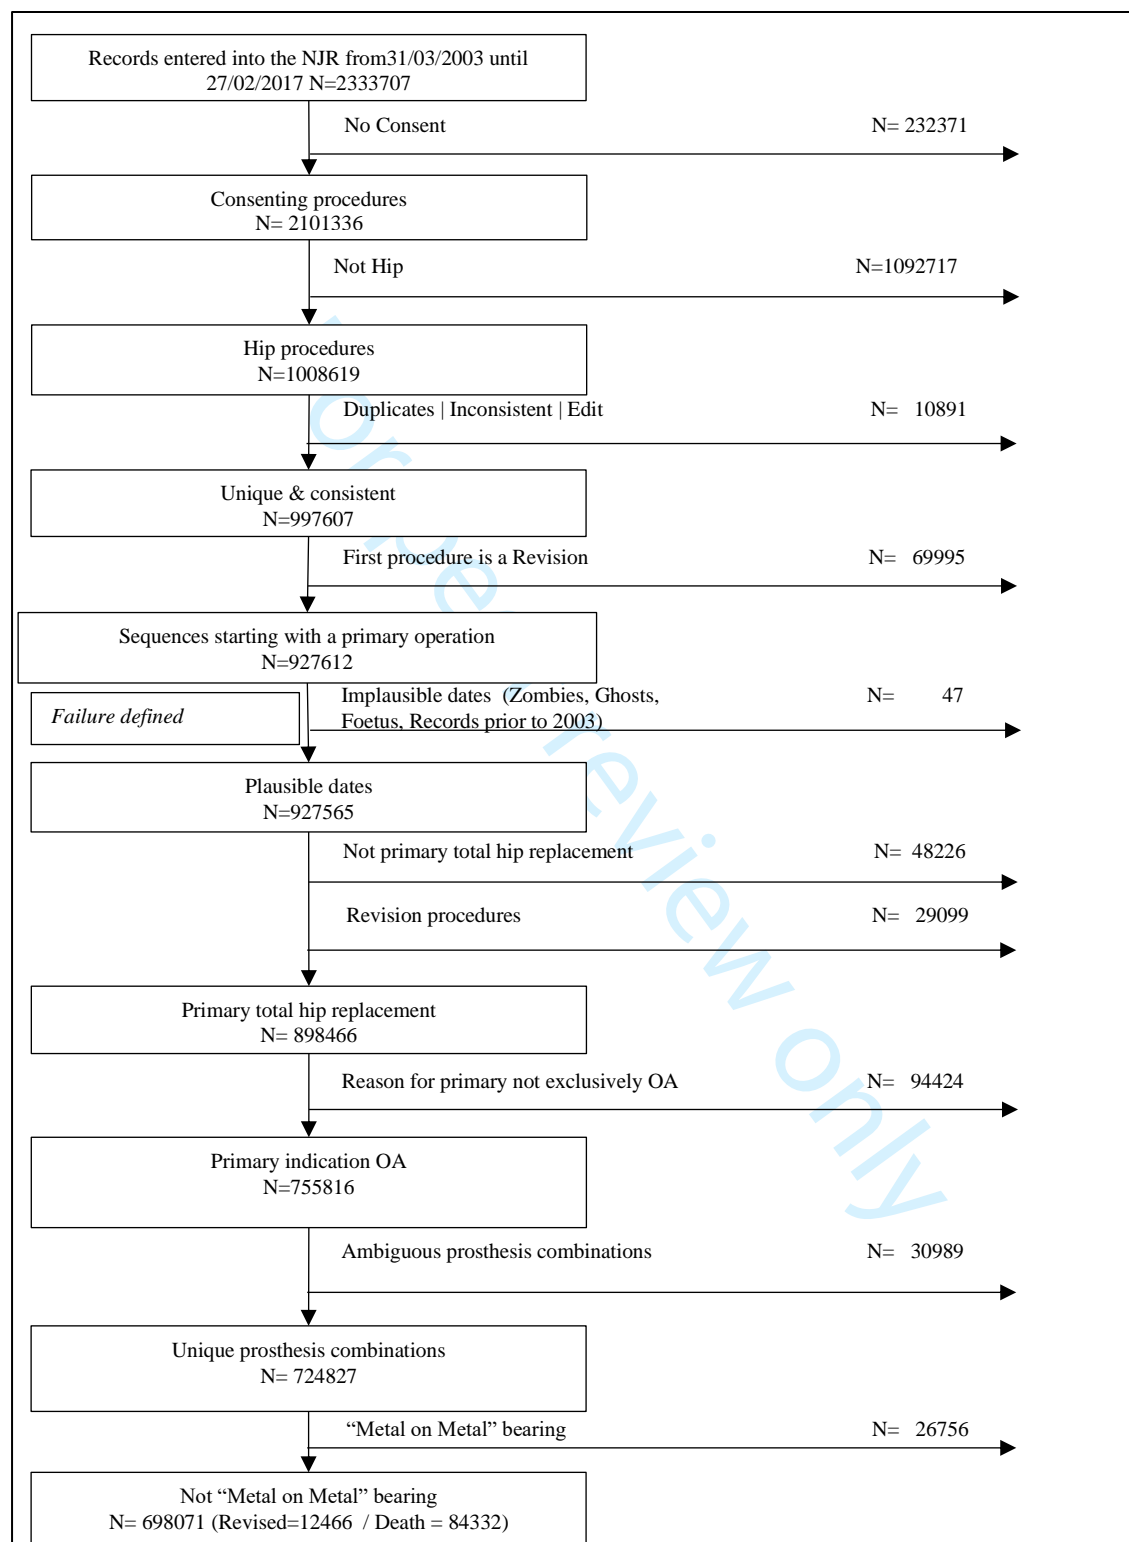

Supplementary.Figure 2: Description of covariate missing data in eligible data

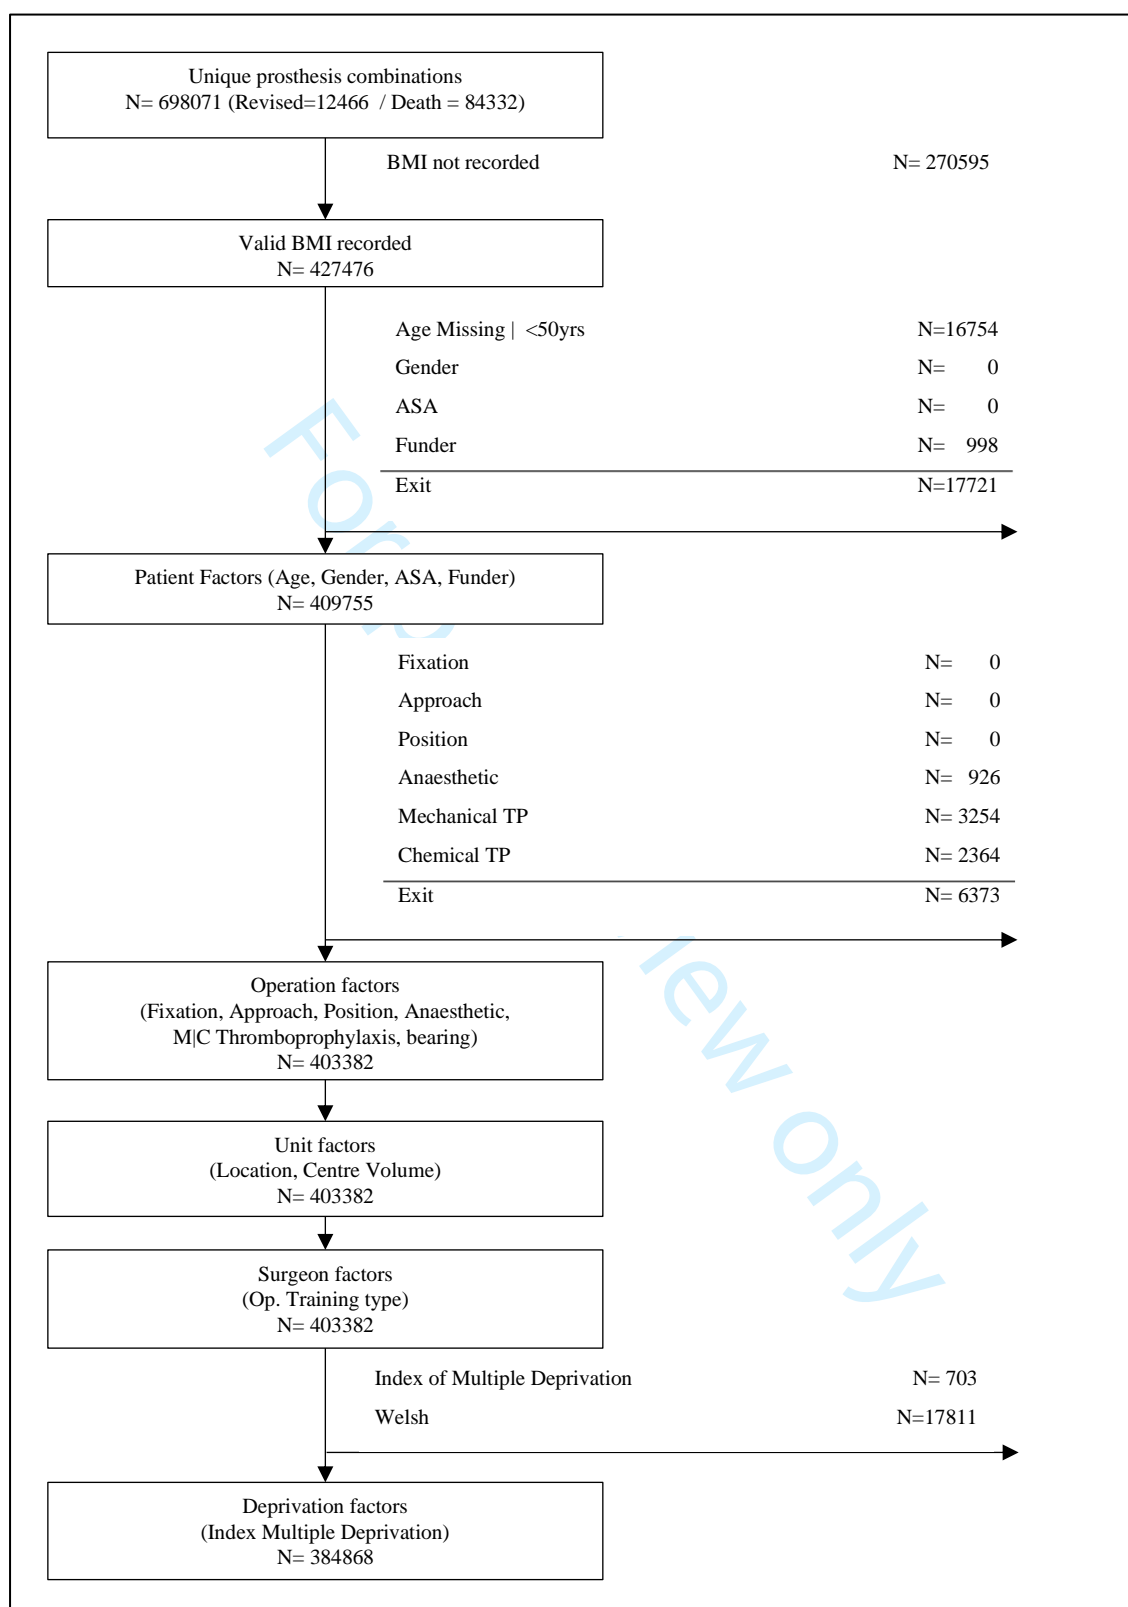

Supplementary.Figure 3: Description of National PROMS linkage to the NJR

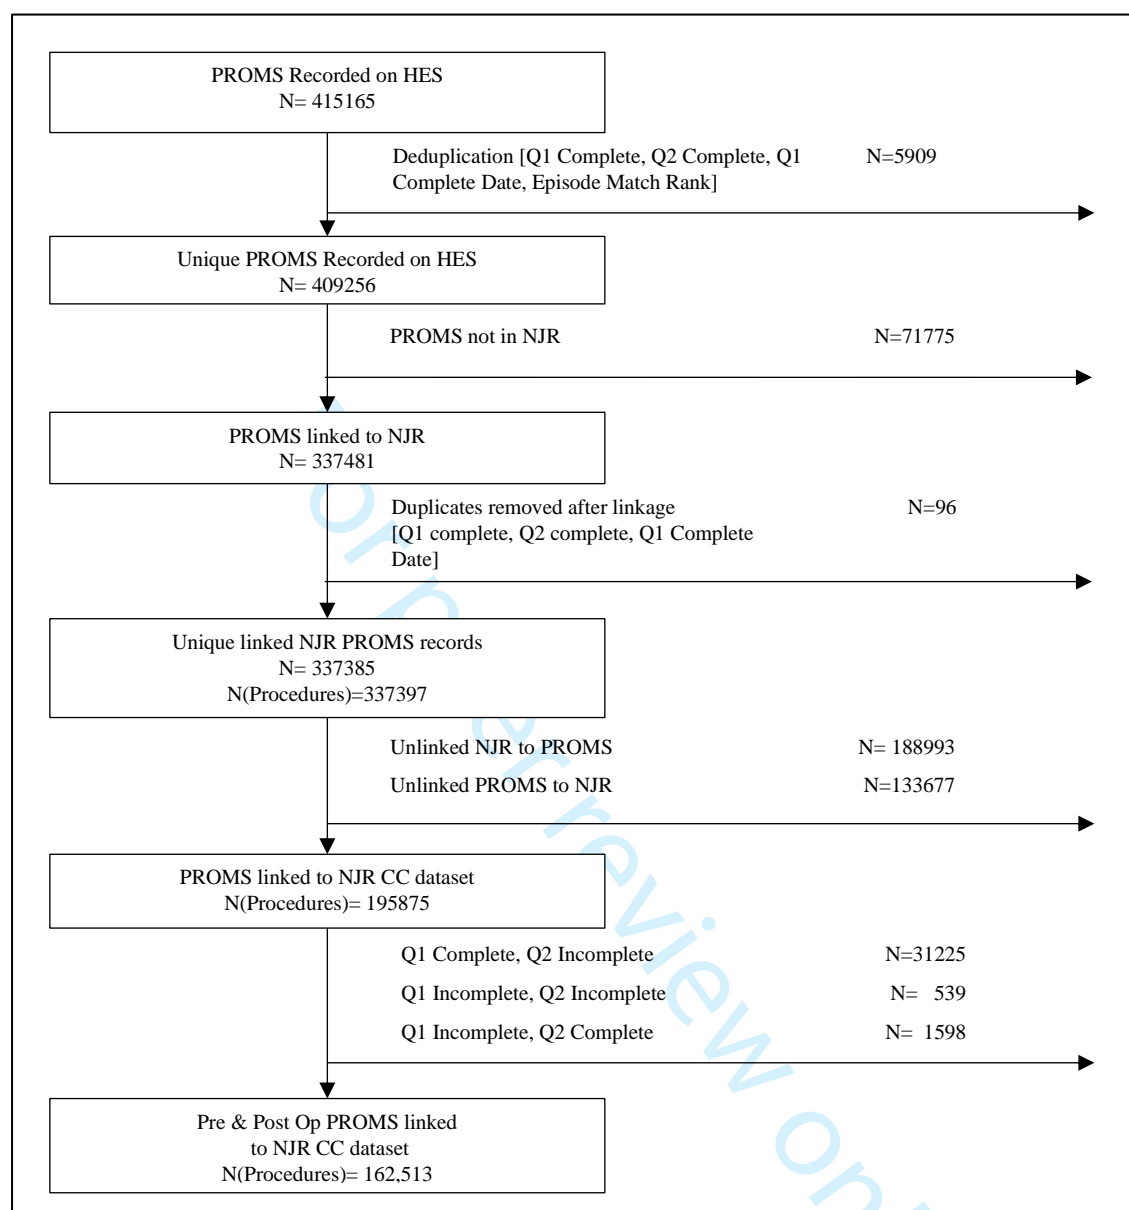

Supplementary.Figure 4: “Zip Plot” of the 1000 95% Confidence intervals for each method of analysis for DGP 1. The vertical axis is the centile of the two-sided p-value against  $H_0 : \beta_3=0$  associated with the confidence interval for MLM and ML Tobit models.

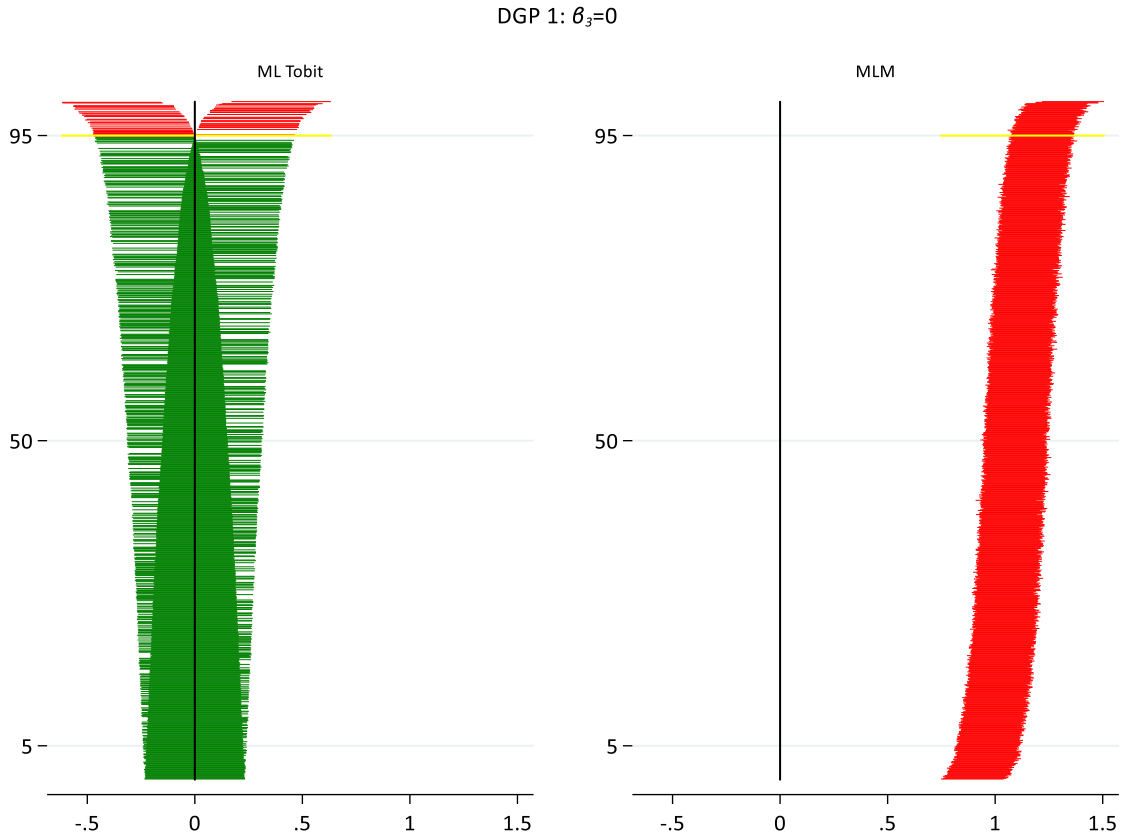

view only



Supplementary Figure 5: “Zip Plot” of the 1000 95% Confidence intervals for each method of analysis for DGP 1. The vertical axis is the centile of the two-sided p-value against  $H_0 : \beta_3=0$  associated with the confidence interval for ML Tobit models with varying constraints of  $\sigma_\varepsilon^2$

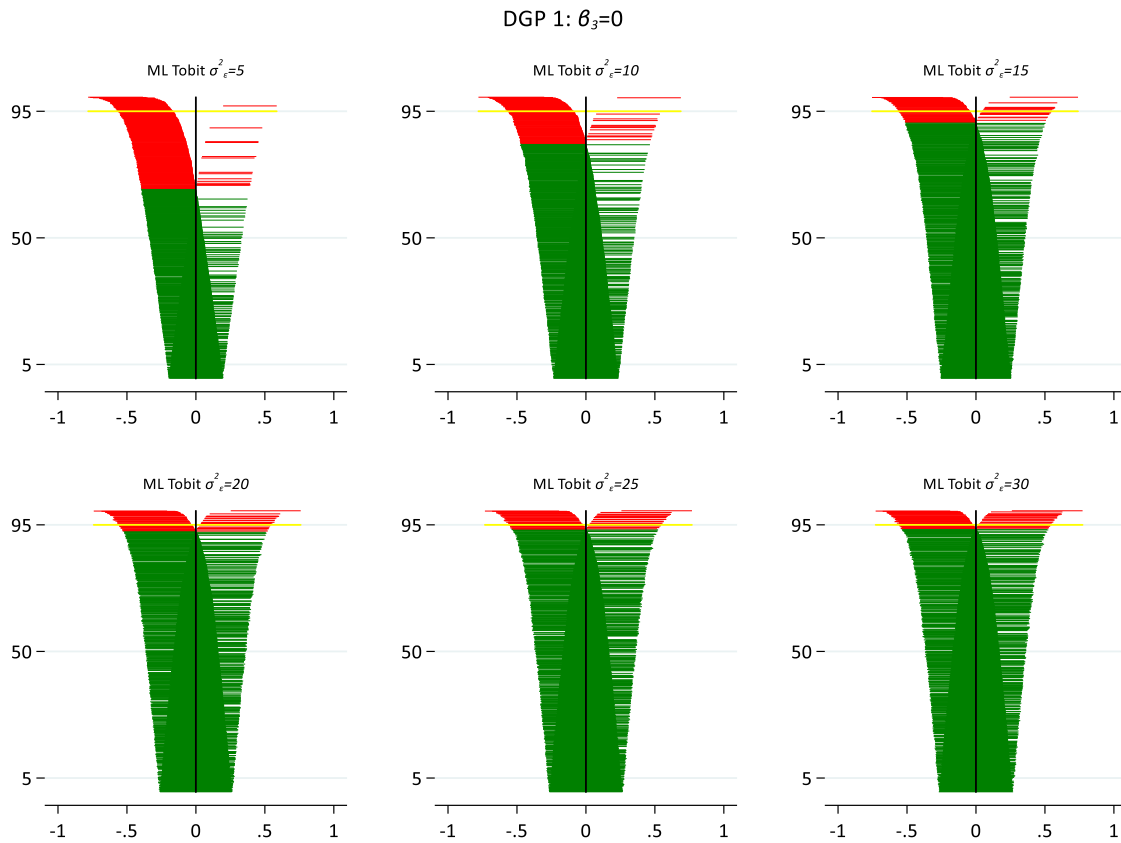

www only

Supplementary Figure 6: “Zip Plot” of the 1000 95% Confidence intervals for each method of analysis for DGP 1. The vertical axis is the centile of the two-sided p-value against  $H_0 : \beta_3=0$  associated with the confidence interval for Single level OLS and Tobit models.

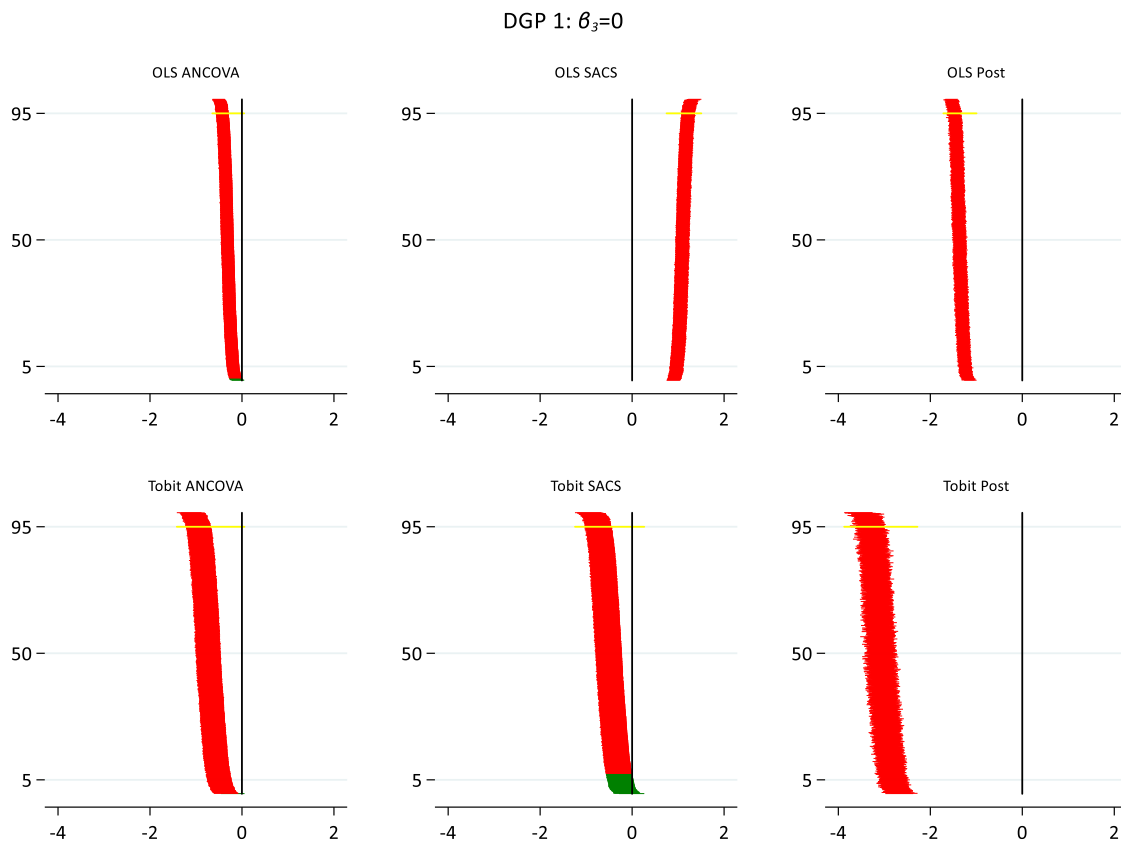

Supplementary.Figure 7: “Zip Plot” of the 1000 95% Confidence intervals for each method of analysis for DGP 2. The vertical axis is the centile of the two-sided p-value against  $H_0 : \beta_3=3$  associated with the confidence interval for MLM and ML Tobit models.

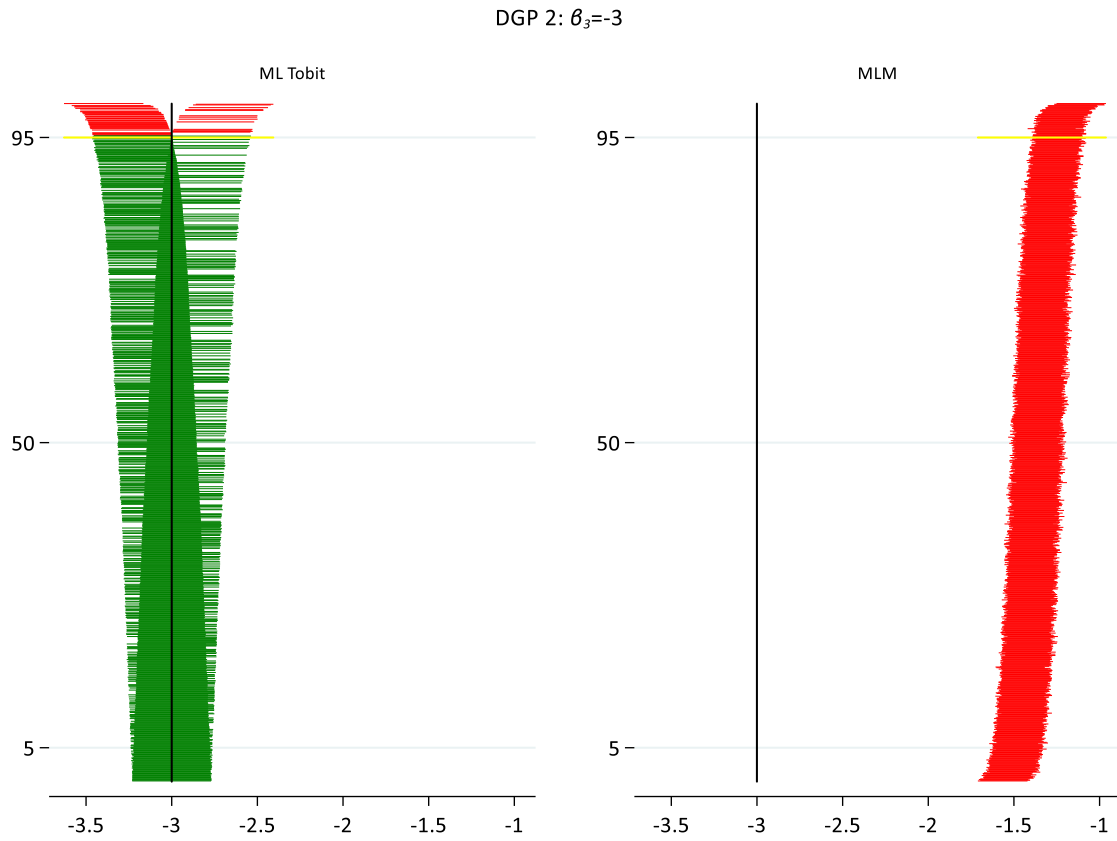

EW only

Supplementary Figure 8: “Zip Plot” of the 1000 95% Confidence intervals for each method of analysis for DGP 2. The vertical axis is the centile of the two-sided p-value against  $H_0 : \beta_3=3$  associated with the confidence interval for ML Tobit models with varying constraints of  $\sigma_\varepsilon^2$

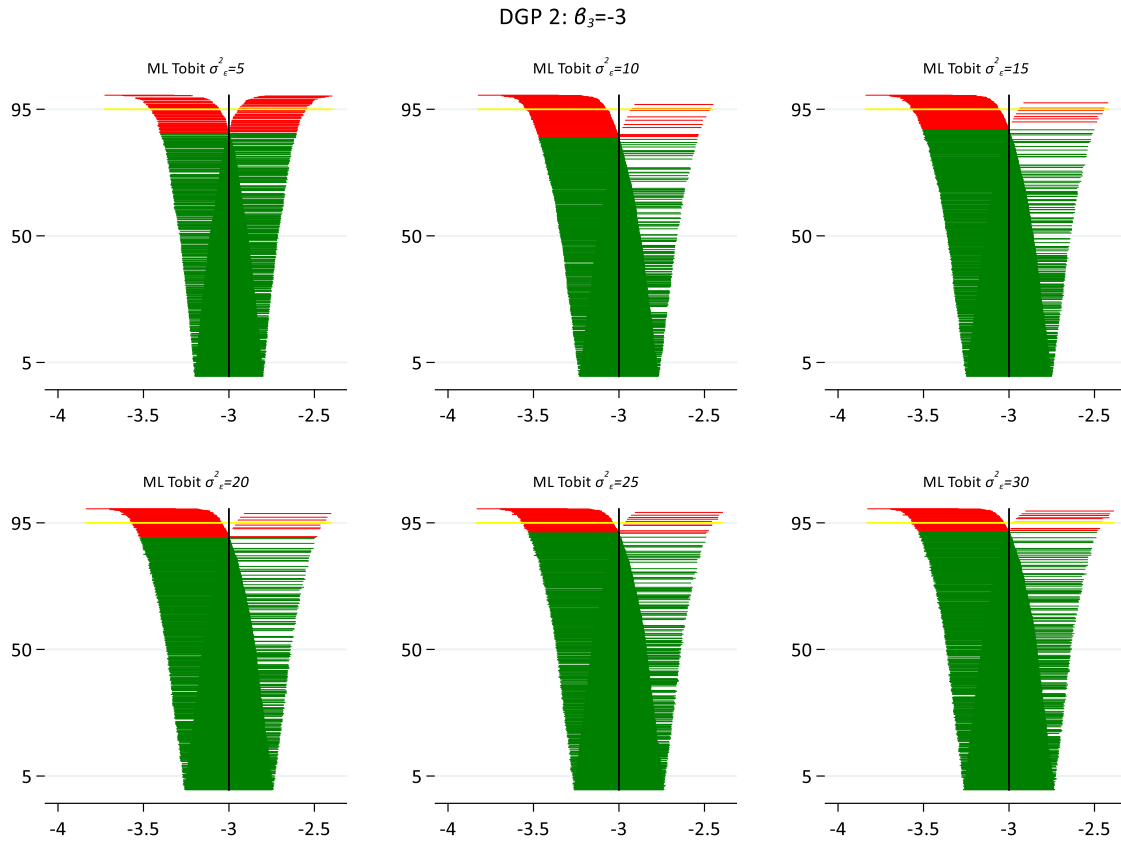

w only

Supplementary Figure 9: "Zip Plot" of the 1000 95% Confidence intervals for each method of analysis for DGP 2. The vertical axis is the centile of the two-sided p-value against  $H_0 : \beta_3=3$  associated with the confidence interval for Single level OLS and Tobit models.

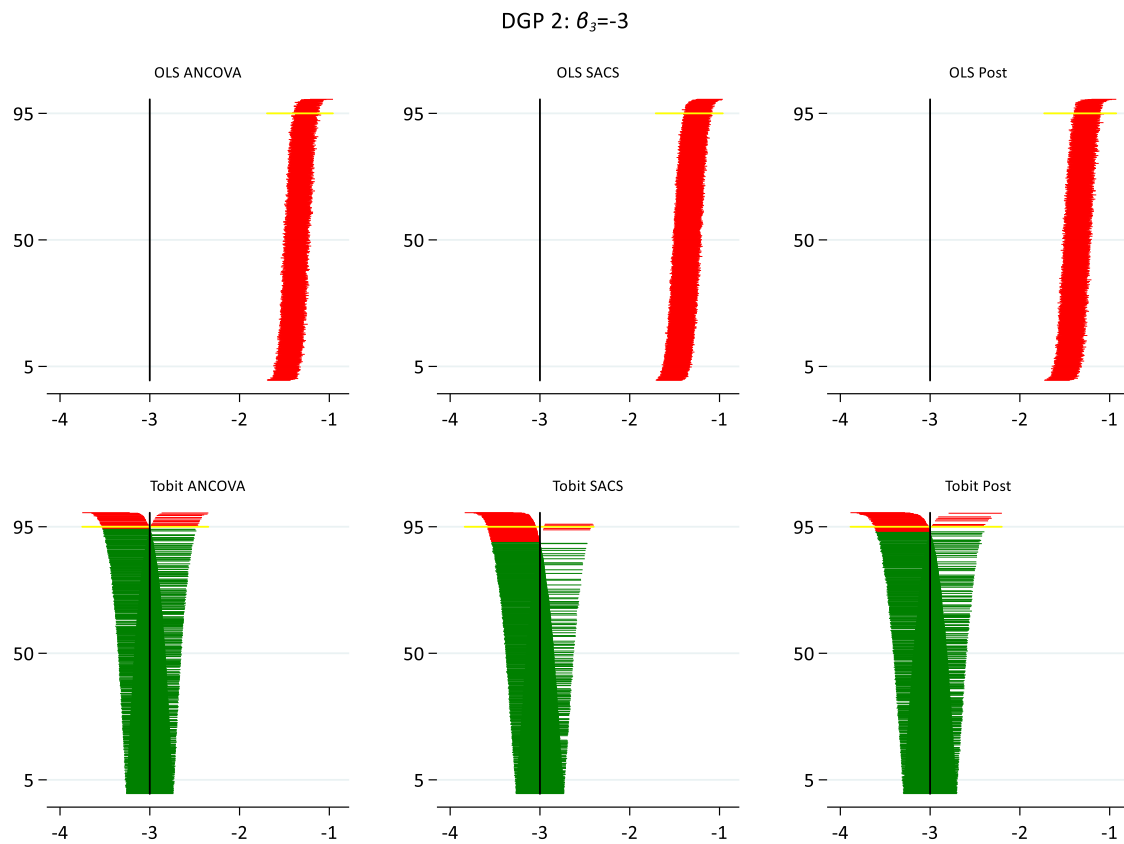

Supplementary Figure 10: “Zip Plot” of the 1000 95% Confidence intervals for each method of analysis for DGP 3. The vertical axis is the centile of the two-sided p-value against  $H_0 : \beta_3=3$  associated with the confidence interval for MLM and ML Tobit models.

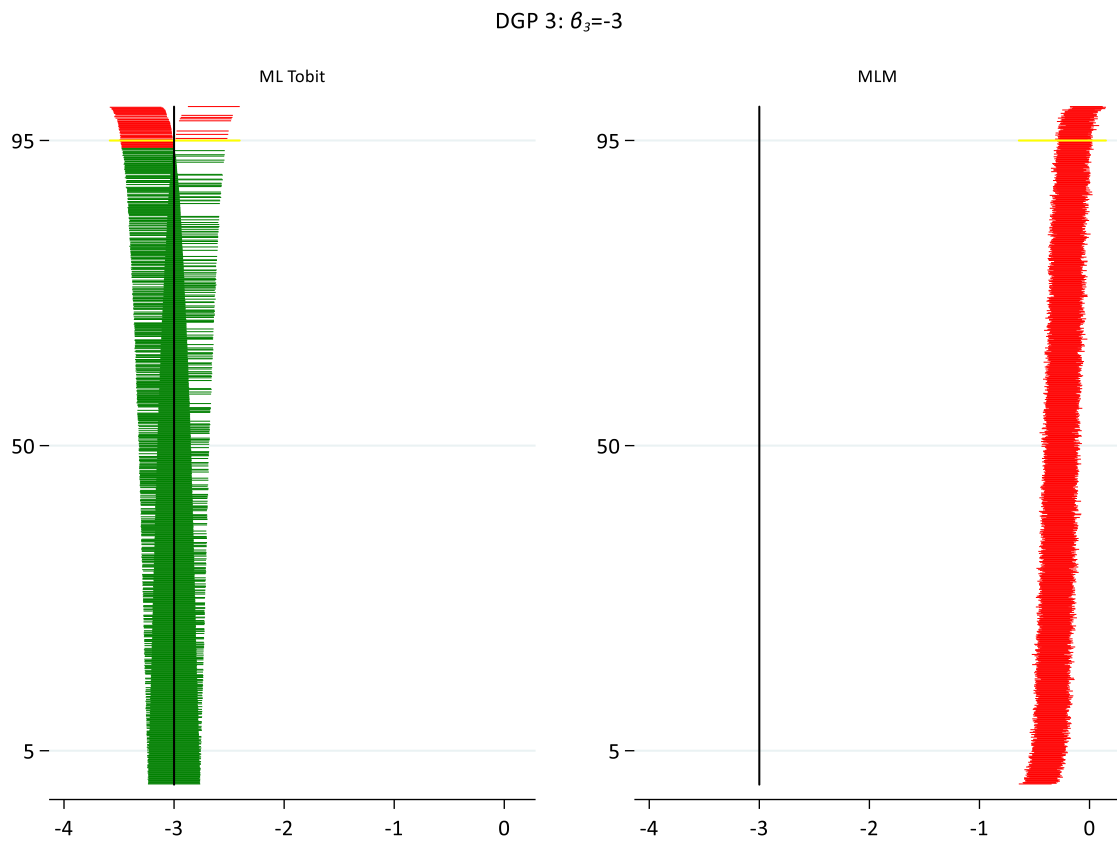

Peer Review Only

Supplementary Figure 11: “Zip Plot” of the 1000 95% Confidence intervals for each method of analysis for DGP 3. The vertical axis is the centile of the two-sided p-value against  $H_0 : \beta_3=3$  associated with the confidence interval for ML Tobit models with varying constraints of  $\sigma_\varepsilon^2$

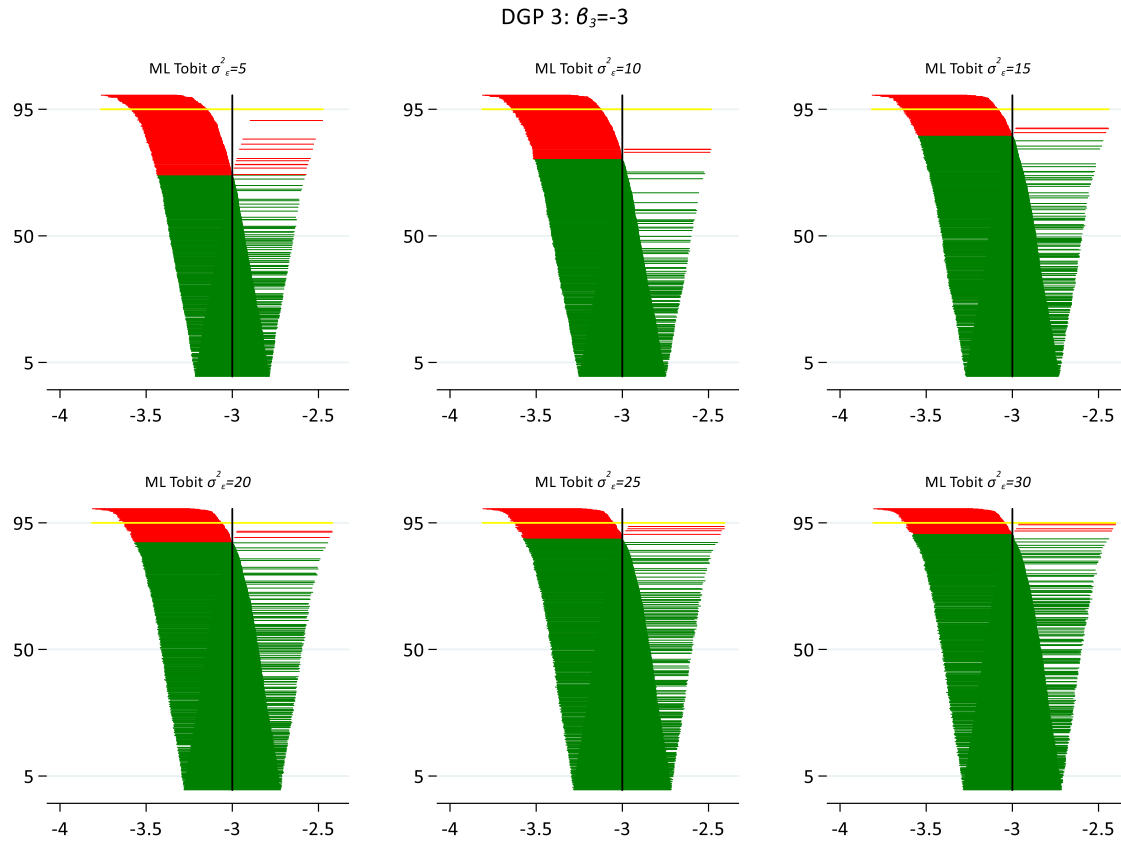

Supplementary.Figure 12: “Zip Plot” of the 1000 95% Confidence intervals for each method of analysis for DGP 3. The vertical axis is the centile of the two-sided p-value against  $H_0 : \beta_3=3$  associated with the confidence interval for Single level OLS and Tobit models.

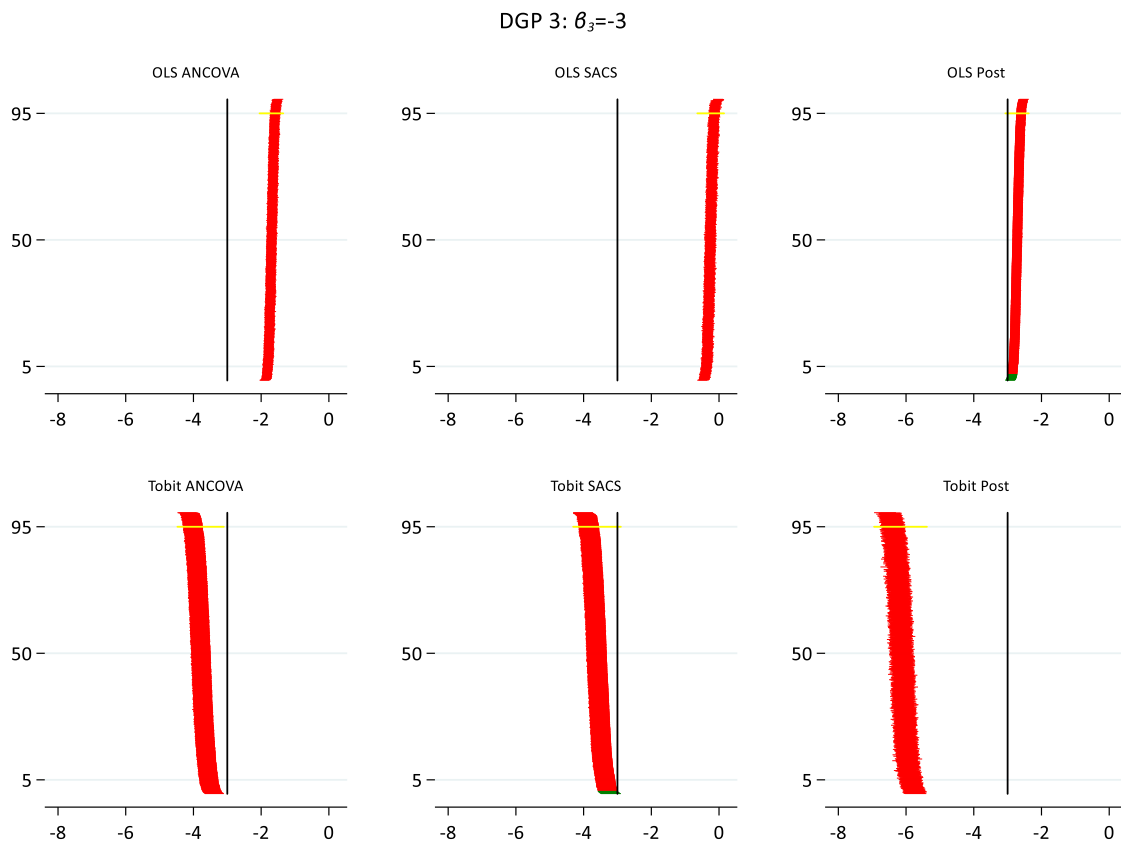

Peer Review Only



1  
2  
3  
4  
5  
6  
7  
8  
9  
10  
11  
12  
13  
14  
15  
16  
17  
18  
19  
20  
21  
22  
23  
24  
25  
26  
27  
28  
29  
30  
31  
32  
33  
34  
35  
36  
37  
38  
39  
40  
41  
42  
43  
44  
45  
46  
47  
48  
49  
50  
51  
52  
53  
54  
55  
56  
57  
58  
59  
60

Supplementary.Figure 13: “Zip Plot” of the 1000 95% Confidence intervals for each method of analysis for DGP 4. The vertical axis is the centile of the two-sided p-value against  $H_0 : \beta_3=0$  associated with the confidence interval for MLM and ML Tobit models.

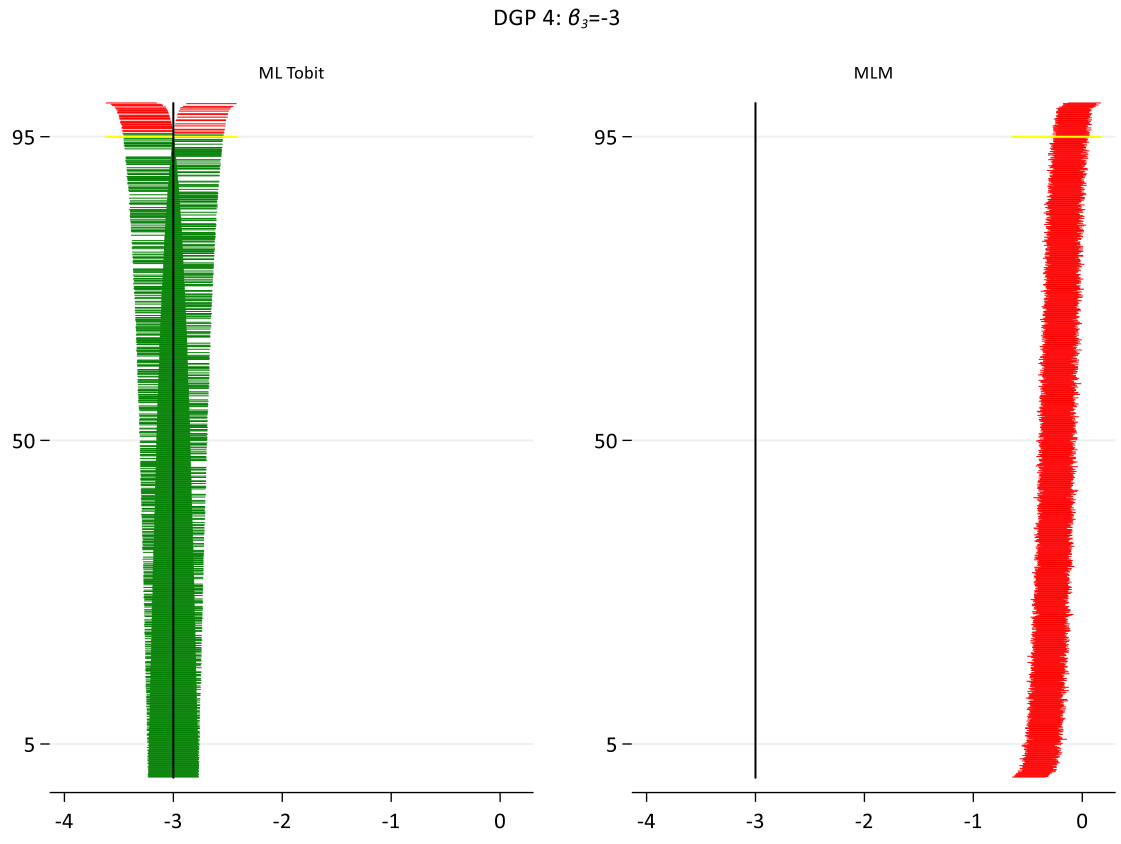

ew only

Supplementary Figure 14: “Zip Plot” of the 1000 95% Confidence intervals for each method of analysis for DGP 4. The vertical axis is the centile of the two-sided p-value against  $H_0 : \beta_3=0$  associated with the confidence interval for ML Tobit models with varying constraints of  $\sigma_\varepsilon^2$

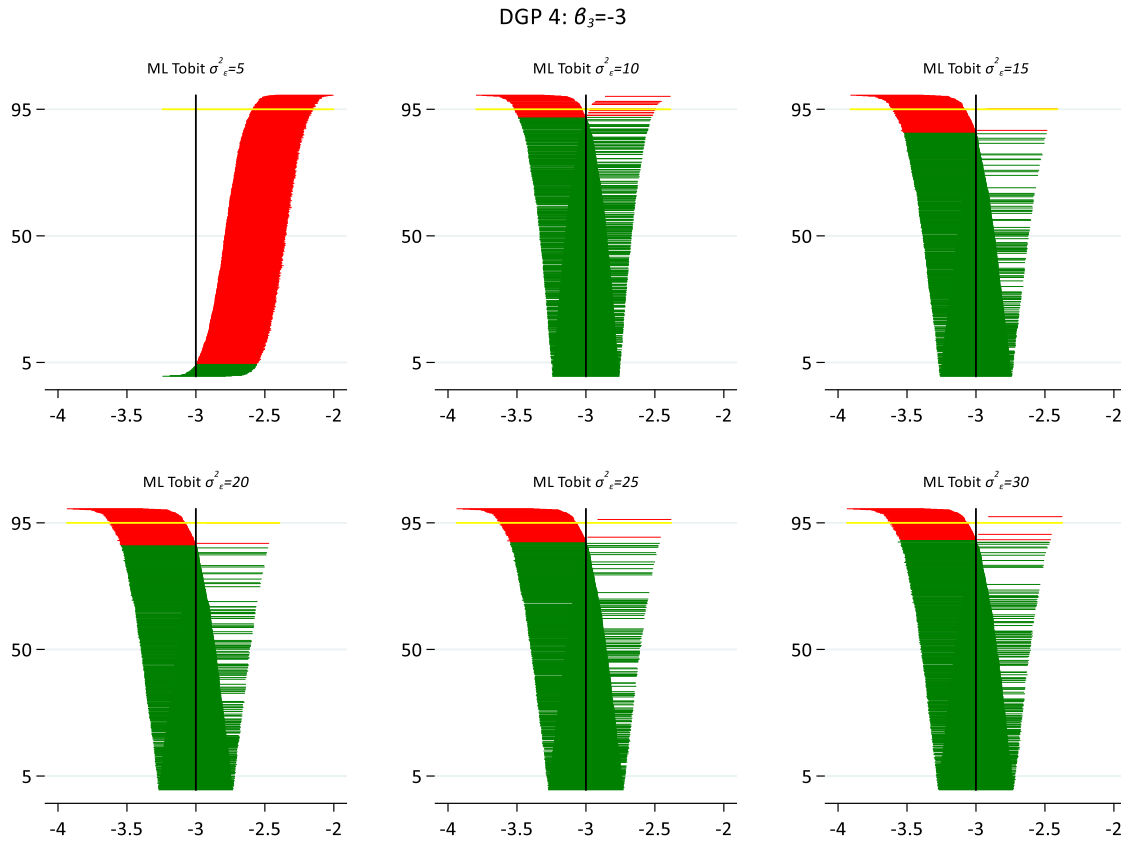

www only

Supplementary.Figure 15: “Zip Plot” of the 1000 95% Confidence intervals for each method of analysis for DGP 4. The vertical axis is the centile of the two-sided p-value against  $H_0 : \beta_3=0$  associated with the confidence interval for Single-level OLS and Tobit models.

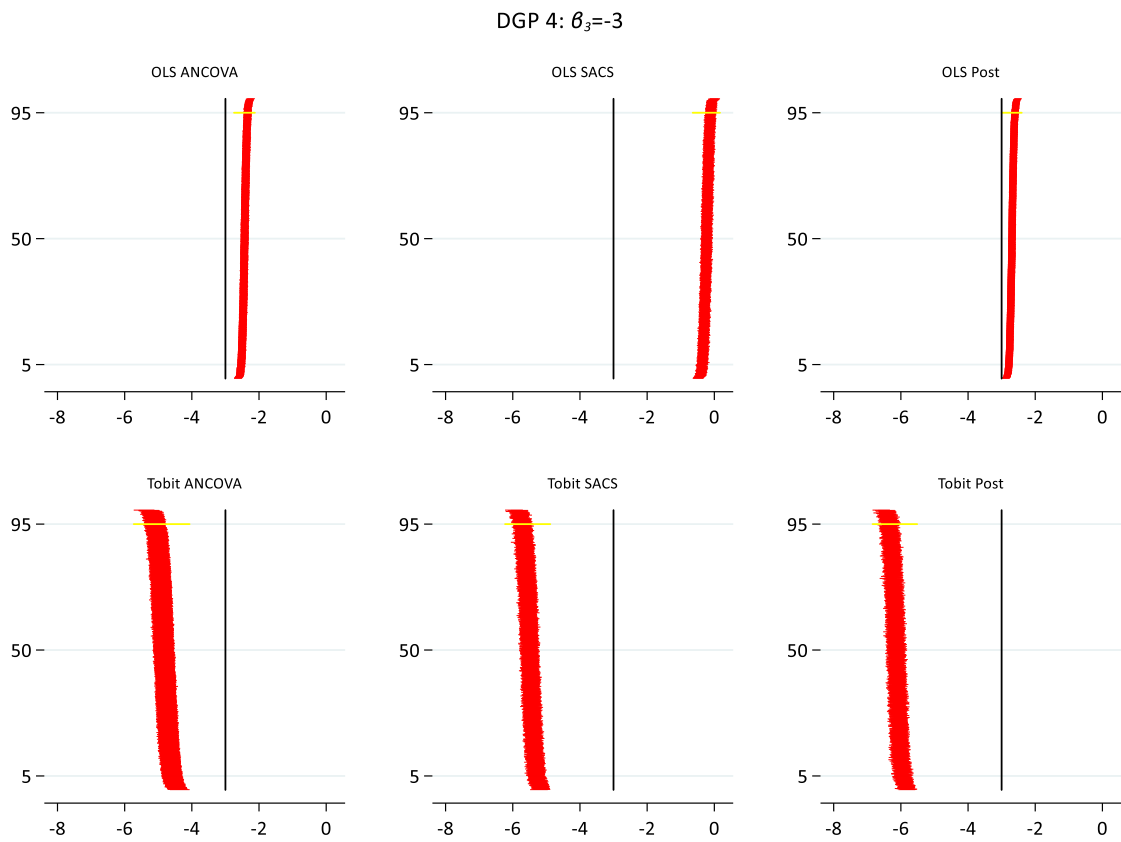

ew only

Supplementary.Figure 16: Marginal effect of level 1 error variance ( $\sigma_{\epsilon}^2$ ) constraint on level 2 variance components

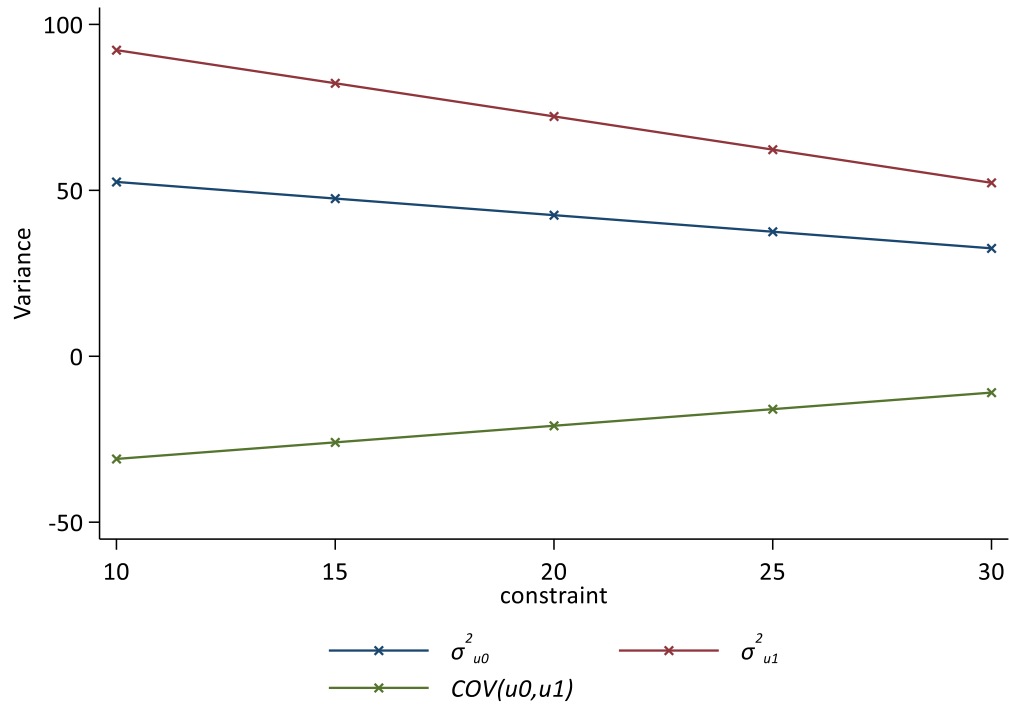

review only
