# Supplementary material for: Analysis of change in patient-reported outcome measures with floor and ceiling effects using the multilevel Tobit model: a simulation study and an example from a National Joint Register using body mass index and the Oxford Hip Score
Source: PubMed Central journal article supplement (PMC7454239; doi:10.1136/bmjopen-2019-033646), 2020-08-27
Supplement: bmjopen-2019-033646supp001.pdf [file bmjopen-2019-033646supp001.pdf]

## Supplementary Tables

Supplementary Table 1: Simulation estimates of performance characteristics (Monte Carlo Standard Error in parantheses)

| Model                              | DGP 1: $\beta_3=0$                 | DGP2 : $\beta_3=-3$ | DGP 3: $\beta_3=-3$ | DGP 4 : $\beta_3=-3$ |                |
|------------------------------------|------------------------------------|---------------------|---------------------|----------------------|----------------|
| Empirical SE                       | MLM                                | 0.075 (0.0017)      | 0.072 (0.0016)      | 0.075 (0.0017)       | 0.079 (0.0018) |
|                                    | ML Tobit                           | 0.12 (0.0027)       | 0.12 (0.0026)       | 0.12 (0.0026)        | 0.12 (0.0026)  |
|                                    | ML Tobit $\sigma_\varepsilon^2=5$  | 0.14 (0.0031)       | 0.13 (0.0029)       | 0.14 (0.0032)        | 0.12 (0.0027)  |
|                                    | ML Tobit $\sigma_\varepsilon^2=10$ | 0.14 (0.0031)       | 0.13 (0.003)        | 0.14 (0.0032)        | 0.13 (0.0029)  |
|                                    | ML Tobit $\sigma_\varepsilon^2=15$ | 0.14 (0.0031)       | 0.13 (0.003)        | 0.14 (0.0032)        | 0.14 (0.003)   |
|                                    | ML Tobit $\sigma_\varepsilon^2=20$ | 0.14 (0.0031)       | 0.13 (0.003)        | 0.14 (0.0032)        | 0.14 (0.0031)  |
|                                    | ML Tobit $\sigma_\varepsilon^2=25$ | 0.14 (0.0031)       | 0.13 (0.003)        | 0.14 (0.0032)        | 0.14 (0.0031)  |
|                                    | ML Tobit $\sigma_\varepsilon^2=30$ | 0.14 (0.0031)       | 0.13 (0.003)        | 0.14 (0.0032)        | 0.14 (0.0031)  |
|                                    | OLS SACS                           | 0.075 (0.0017)      | 0.072 (0.0016)      | 0.075 (0.0017)       | 0.079 (0.0018) |
|                                    | OLS ANCOVA                         | 0.07 (0.0016)       | 0.064 (0.0014)      | 0.068 (0.0015)       | 0.059 (0.0013) |
|                                    | OLS Post                           | 0.072 (0.0016)      | 0.07 (0.0016)       | 0.071 (0.0016)       | 0.056 (0.0013) |
|                                    | Tobit SACS                         | 0.14 (0.0031)       | 0.13 (0.0029)       | 0.14 (0.0031)        | 0.15 (0.0034)  |
|                                    | Tobit ANCOVA                       | 0.14 (0.0032)       | 0.13 (0.003)        | 0.14 (0.0032)        | 0.13 (0.003)   |
|                                    | Tobit Post                         | 0.16 (0.0035)       | 0.15 (0.0034)       | 0.16 (0.0035)        | 0.13 (0.0028)  |
|                                    | Mean Square Error                  | MLM                 | 1.21 (0.0052)       | 2.69 (0.0075)        | 7.54 (0.013)   |
| ML Tobit                           |                                    | 0.014 (0.0007)      | 0.014 (0.0006)      | 0.015 (0.0007)       | 0.014 (0.0006) |
| ML Tobit $\sigma_\varepsilon^2=5$  |                                    | 0.036 (0.0015)      | 0.017 (0.0008)      | 0.038 (0.0015)       | 0.2 (0.0033)   |
| ML Tobit $\sigma_\varepsilon^2=10$ |                                    | 0.028 (0.0012)      | 0.025 (0.0011)      | 0.041 (0.0015)       | 0.019 (0.0009) |
| ML Tobit $\sigma_\varepsilon^2=15$ |                                    | 0.023 (0.001)       | 0.026 (0.0011)      | 0.035 (0.0013)       | 0.032 (0.0014) |
| ML Tobit $\sigma_\varepsilon^2=20$ |                                    | 0.021 (0.0009)      | 0.024 (0.001)       | 0.032 (0.0013)       | 0.033 (0.0014) |
| ML Tobit $\sigma_\varepsilon^2=25$ |                                    | 0.02 (0.0009)       | 0.023 (0.001)       | 0.03 (0.0012)        | 0.032 (0.0014) |
| ML Tobit $\sigma_\varepsilon^2=30$ |                                    | 0.02 (0.0009)       | 0.022 (0.001)       | 0.029 (0.0012)       | 0.031 (0.0014) |
| OLS SACS                           |                                    | 1.21 (0.0052)       | 2.69 (0.0075)       | 7.54 (0.013)         | 7.66 (0.014)   |
| OLS ANCOVA                         |                                    | 0.1 (0.0014)        | 2.68 (0.0066)       | 1.71 (0.0056)        | 0.33 (0.0021)  |
| OLS Post                           |                                    | 1.86 (0.0062)       | 2.68 (0.0073)       | 0.085 (0.0013)       | 0.097 (0.0011) |
| Tobit SACS                         |                                    | 0.54 (0.0064)       | 0.018 (0.0008)      | 0.63 (0.0069)        | 3.37 (0.018)   |
| Tobit ANCOVA                       |                                    | 0.27 (0.0046)       | 0.027 (0.0011)      | 0.39 (0.0056)        | 6.25 (0.021)   |
| Tobit Post                         |                                    | 9.42 (0.03)         | 0.027 (0.0012)      | 9.81 (0.031)         | 9.88 (0.025)   |
| Relative Error                     |                                    | MLM                 | -1.31 (2.21)        | 1.98 (2.28)          | 2.74 (2.3)     |
|                                    | ML Tobit                           | -0.95 (2.22)        | 0.79 (2.25)         | 2.37 (2.29)          | 1.66 (2.27)    |
|                                    | ML Tobit $\sigma_\varepsilon^2=5$  | -28.5 (1.6)         | -22.8 (1.73)        | -23.8 (1.71)         | -7.01 (2.08)   |
|                                    | ML Tobit $\sigma_\varepsilon^2=10$ | -14.5 (1.91)        | -10.3 (2.01)        | -8.8 (2.04)          | -3.97 (2.15)   |
|                                    | ML Tobit $\sigma_\varepsilon^2=15$ | -7.35 (2.07)        | -3.54 (2.16)        | -2.41 (2.18)         | -2.46 (2.18)   |
|                                    | ML Tobit $\sigma_\varepsilon^2=20$ | -4.29 (2.14)        | -0.57 (2.22)        | 0.26 (2.24)          | -1.4 (2.21)    |
|                                    | ML Tobit $\sigma_\varepsilon^2=25$ | -3.04 (2.17)        | 0.65 (2.25)         | 1.35 (2.27)          | -0.8 (2.22)    |
|                                    | ML Tobit $\sigma_\varepsilon^2=30$ | -2.51 (2.18)        | 1.17 (2.26)         | 1.83 (2.28)          | -0.47 (2.23)   |
|                                    | OLS SACS                           | -1.3 (2.21)         | 1.99 (2.28)         | 2.75 (2.3)           | -0.3 (2.23)    |
|                                    | OLS ANCOVA                         | -0.5 (2.23)         | 1.51 (2.27)         | 6.84 (2.39)          | -0.54 (2.23)   |
|                                    | OLS Post                           | -1.96 (2.19)        | -0.086 (2.24)       | 1.46 (2.27)          | -1.25 (2.21)   |

|                    |                                      |               |              |              |               |
|--------------------|--------------------------------------|---------------|--------------|--------------|---------------|
|                    | Tobit SACS                           | -2.97 (2.17)  | 2.09 (2.28)  | 2.82 (2.3)   | -0.056 (2.24) |
|                    | Tobit ANCOVA                         | -0.19 (2.23)  | 2.21 (2.29)  | 4.01 (2.33)  | -1.35 (2.21)  |
|                    | Tobit Post                           | -2.82 (2.17)  | 1.27 (2.27)  | 2.74 (2.3)   | 0.83 (2.26)   |
| Relative Precision | MLM                                  | 247(14.1)     | 232.3 (13.9) | 275.4 (16.9) | 132.5 (6.66)  |
|                    | ML Tobit                             | 37.8 (4.36)   | 28.3 (4.07)  | 50.5 (5.64)  | 6.08 (3.13)   |
|                    | ML Tobit $\sigma_{\varepsilon}^2=5$  |               |              |              |               |
|                    | ML Tobit $\sigma_{\varepsilon}^2=10$ | -0.034 (0.97) | -0.92 (1.07) | 3.91 (1.24)  | -13.3 (1.5)   |
|                    | ML Tobit $\sigma_{\varepsilon}^2=15$ | 0.62 (1.22)   | -1.66 (1.37) | 3.24 (1.52)  | -22.5 (1.68)  |
|                    | ML Tobit $\sigma_{\varepsilon}^2=20$ | 1.22 (1.3)    | -1.7 (1.44)  | 2.57 (1.6)   | -26 (1.7)     |
|                    | ML Tobit $\sigma_{\varepsilon}^2=25$ | 1.67 (1.33)   | -1.52 (1.47) | 2.31 (1.62)  | -27.2 (1.7)   |
|                    | ML Tobit $\sigma_{\varepsilon}^2=30$ | 1.99 (1.34)   | -1.34 (1.47) | 2.29 (1.63)  | -27.5 (1.69)  |
|                    | OLS SACS                             | 247(14.1)     | 232.3 (13.9) | 275.4 (16.9) | 132.5 (6.66)  |
|                    | OLS ANCOVA                           | 297.2(16)     | 327.4 (14.8) | 357.6 (20.9) | 310.3 (18.8)  |
|                    | OLS Post                             | 281.7(15.5)   | 250 (14.8)   | 312.9 (19.2) | 360.1 (21.2)  |
|                    | Tobit SACS                           | 2.26 (1.94)   | 1.8 (1.89)   | 7.48 (2.72)  | -38.6 (2.12)  |
|                    | Tobit ANCOVA                         | -5.67 (3.07)  | -2.33 (1.55) | 1.52 (3.56)  | -19.1 (3.59)  |
|                    | Tobit Post                           | -19.5 (2.6)   | -22.5 (2.6)  | -15.9 (2.95) | -10.6 (4.08)  |
